# Supplementary material for: Systematic investigation of mouse models of Parkinson's disease by transcriptome mapping on a brain-specific genome-scale metabolic network
Source: Royal Society of Chemistry journal article supplement (doi:10.1039/d0mo00135j), 2021-03-09
Supplement: d0mo00135j2.xlsx [file d0mo00135j2.xlsx]

## Sheet: Sayfa1
Reaction Name	Associated Metabolic Pathway	Localization	Reaction	GPR Rules	EC Numbers
RA_gly1_c	Glycolysis	Astrocyte	Glucose_A[c] + ATP_A[c] -> Glucose-6-phosphate_A[c] + ADP_A[c]	Gck | Hkdc1 | Hk1 | Hk2 | Hk3 | Ltk	EC-2.7.1.2 | EC-2.7.1.1
RA_gly2_c	Glycolysis	Astrocyte	Glucose-6-phosphate_A[c] <-> Fructose-6-phosphate_A[c]	Gpi1	EC-5.3.1.9
RA_gly3_c	Glycolysis	Astrocyte	Fructose-6-phosphate_A[c] + ATP_A[c] -> Fructose-1-6-biphosphate_A[c] + ADP_A[c]	Pfkl & Pfkm & Pfkp	EC-2.7.1.11
RA_gly4_c	Glycolysis	Astrocyte	Fructose-1-6-biphosphate_A[c] <-> Glyceraldehyde-3-phosphate_A[c] + Dihydroxyacetone-phosphate_A[c]	Aldoart1 | Aldoart2 | Aldoc | Aldoa | Aldob	EC-4.1.2.13
RA_gly5_c	Glycolysis	Astrocyte	Dihydroxyacetone-phosphate_A[c] <-> Glyceraldehyde-3-phosphate_A[c]	Tpi1	EC-5.3.1.1
RA_gly6_c	Glycolysis	Astrocyte	Glyceraldehyde-3-phosphate_A[c] + NAD_A[c] <-> 1-3-biphosphoglycerate_A[c] + NADH_A[c]	Gm6498 | Gapdhs | Gapdh	EC-1.2.1.12
RA_gly7_c	Glycolysis	Astrocyte	1-3-biphosphoglycerate_A[c] + ADP_A[c] <-> 3-phosphoglycerate_A[c] + ATP_A[c]	Pgk1 | Pgk2	EC-2.7.2.3
RA_gly8_c	Glycolysis	Astrocyte	1-3-biphosphoglycerate_A[c] <-> 2-3-Disphospho-D-glycerate_A[c]	Bpgm	EC-5.4.2.4
RA_gly9_c	Glycolysis	Astrocyte	2-3-Disphospho-D-glycerate_A[c] -> 3-phosphoglycerate_A[c] + phosphate_A[c]	Pgam1 | Pgam2 | Bpgm	EC-3.1.3.13
RA_gly10_c	Glycolysis	Astrocyte	3-phosphoglycerate_A[c] <-> 2-phosphoglycerate_A[c]	Pgam1 | Pgam2	EC-5.4.2.1
RA_gly11_c	Glycolysis	Astrocyte	2-phosphoglycerate_A[c] <-> Phosphoenol-pyruvate_A[c]	Eno1 & Eno2 & Eno3 & 6430537H07Rik	EC-4.2.1.11
RA_gly12_c	Glycolysis	Astrocyte	Oxoloacetate_A[c] + GTP_A[c] -> Phosphoenol-pyruvate_A[c] + CO2_A[c] + GDP_A[c]	Pck1	EC-4.1.1.32
RA_gly13_m	Glycolysis	Astrocyte	Oxoloacetate_A[m] + GTP_A[m] -> Phosphoenol-pyruvate_A[m] + CO2_A[m] + GDP_A[m]	Pck2	EC-4.1.1.32
RA_gly14_c	Glycolysis	Astrocyte	Phosphoenol-pyruvate_A[c] + ADP_A[c] -> Pyruvate_A[c] + ATP_A[c]	Pkm | Pklr	EC-2.7.1.40
RA_gly15_c	Glycolysis	Astrocyte	Malate_A[c] + NADP_A[c] -> Pyruvate_A[c] + NADPH_A[c] + CO2_A[c]	Me1 | Me3 | Mod2	EC-1.1.1.40
RA_gly16_c	Glycolysis	Astrocyte	Pyruvate_A[c] + NADH_A[c] <-> Lactate_A[c] + NAD_A[c]	Ldhal6b | Ldha | Ldhb | Ldhc	EC-1.1.1.27
RAN_t1_c	ANLSH	Intercellular	Lactate_A[c] -> Lactate_N[c]
RA_gly17_m	Glycolysis	Astrocyte	Pyruvate_A[m] + ATP_A[m] + Bicarbonate_A[m] -> Oxoloacetate_A[m] + ADP_A[m] + phosphate_A[m]	Pcx	EC-6.4.1.1
RA_gly18_m	Glycolysis	Astrocyte	Pyruvate_A[m] + NAD_A[m] + CoenzymeA_A[m] -> Acetyl-CoA_A[m] + CO2_A[m] + NADH_A[m]	Dlat & Pdhb & ( Pdha1 | Pdha2 )	EC-1.2.4.1 | EC-2.3.1.12
RN_gly1_c	Glycolysis	Neuron	Glucose_N[c] + ATP_N[c] -> Glucose-6-phosphate_N[c] + ADP_N[c]	Gck | Hkdc1 | Hk1 | Hk2 | Hk3 | Ltk	EC-2.7.1.2 | EC-2.7.1.1
RN_gly2_c	Glycolysis	Neuron	Glucose-6-phosphate_N[c] <-> Fructose-6-phosphate_N[c]	Gpi1	EC-5.3.1.9
RN_gly3_c	Glycolysis	Neuron	Fructose-6-phosphate_N[c] + ATP_N[c] -> Fructose-1-6-biphosphate_N[c] + ADP_N[c]	Pfkl & Pfkm & Pfkp	EC-2.7.1.11
RN_gly4_c	Glycolysis	Neuron	Fructose-1-6-biphosphate_N[c] <-> Glyceraldehyde-3-phosphate_N[c] + Dihydroxyacetone-phosphate_N[c]	Aldoart1 | Aldoart2 | Aldoc | Aldoa | Aldob	EC-4.1.2.13
RN_gly5_c	Glycolysis	Neuron	Dihydroxyacetone-phosphate_N[c] <-> Glyceraldehyde-3-phosphate_N[c]	Tpi1	EC-5.3.1.1
RN_gly6_c	Glycolysis	Neuron	Glyceraldehyde-3-phosphate_N[c] + NAD_N[c] + phosphate_N[c] <-> 1-3-biphosphoglycerate_N[c] + NADH_N[c]	Gm6498 | Gapdhs | Gapdh	EC-1.2.1.12
RN_gly7_c	Glycolysis	Neuron	1-3-biphosphoglycerate_N[c] + ADP_N[c] <-> 3-phosphoglycerate_N[c] + ATP_N[c]	Pgk1 | Pgk2	EC-2.7.2.3
RN_gly8_c	Glycolysis	Neuron	1-3-biphosphoglycerate_N[c] <-> 2-3-Disphospho-D-glycerate_N[c]	Bpgm	EC-5.4.2.4
RN_gly9_c	Glycolysis	Neuron	2-3-Disphospho-D-glycerate_N[c] -> 3-phosphoglycerate_N[c] + phosphate_N[c]	Pgam1 | Pgam2 | Bpgm	EC-3.1.3.13
RN_gly10_c	Glycolysis	Neuron	3-phosphoglycerate_N[c] <-> 2-phosphoglycerate_N[c]	Pgam1 | Pgam2	EC-5.4.2.1
RN_gly11_c	Glycolysis	Neuron	2-phosphoglycerate_N[c] <-> Phosphoenol-pyruvate_N[c]	Eno1 & Eno2 & Eno3 & 6430537H07Rik	EC-4.2.1.11
RN_gly12_c	Glycolysis	Neuron	Oxoloacetate_N[c] + GTP_N[c] -> Phosphoenol-pyruvate_N[c] + CO2_N[c] + GDP_N[c]	Pck1	EC-4.1.1.32
RN_gly13_m	Glycolysis	Neuron	Oxoloacetate_N[m] + GTP_N[m] -> Phosphoenol-pyruvate_N[m] + CO2_N[m] + GDP_N[m]	Pck2	EC-4.1.1.32
RN_gly14_c	Glycolysis	Neuron	Phosphoenol-pyruvate_N[c] + ADP_N[c] -> Pyruvate_N[c] + ATP_N[c]	Pkm | Pklr	EC-2.7.1.40
RN_gly15_m	Glycolysis	Neuron	Malate_N[m] + NADP_N[m] -> Pyruvate_N[m] + NADPH_N[m] + CO2_N[m]	Me1 | Me3 | Mod2	EC-1.1.1.40
RN_gly16_c	Glycolysis	Neuron	Pyruvate_N[c] + NADH_N[c] <-> Lactate_N[c] + NAD_N[c]	Ldhal6b | Ldha | Ldhb | Ldhc	EC-1.1.1.27
RN_gly17_m	Glycolysis	Neuron	Pyruvate_N[m] + NAD_N[m] + CoenzymeA_N[m] -> Acetyl-CoA_N[m] + CO2_N[m] + NADH_N[m]	Dlat & Pdhb & ( Pdha1 | Pdha2 )	EC-1.2.4.1 | EC-2.3.1.12
RA_ppp1_c	Pentose Phosphate Pathway	Astrocyte	Glucose-6-phosphate_A[c] + NADP_A[c] <-> 6-phosphoglucone_A[c] + NADPH_A[c]	G6pd2 | G6pdx	EC-1.1.1.49
RA_ppp2_c	Pentose Phosphate Pathway	Astrocyte	6-phosphoglucone_A[c] -> 6-phosphogluconate_A[c]	Pgls | H6pd	EC-3.1.1.31
RA_ppp3_c	Pentose Phosphate Pathway	Astrocyte	6-phosphogluconate_A[c] + NADP_A[c] -> Ribulose-5-phosphate_A[c] + NADPH_A[c] + CO2_A[c]	Pgd	EC-1.1.1.44
RA_ppp4_c	Pentose Phosphate Pathway	Astrocyte	Ribulose-5-phosphate_A[c] <-> Xylulose-5-phosphate_A[c]	Rpe	EC-5.1.3.1
RA_ppp5_c	Pentose Phosphate Pathway	Astrocyte	Ribulose-5-phosphate_A[c] <-> Ribose-5-phosphate_A[c]	Rpia	EC-5.3.1.6
RA_ppp6_c	Pentose Phosphate Pathway	Astrocyte	Ribose-5-phosphate_A[c] + Xylulose-5-phosphate_A[c] <-> Sedoheptulose-7-phosphate_A[c] + Glyceraldehyde-3-phosphate_A[c]	Tktl1 | Tktl2 | Tkt	EC-2.2.1.1
RA_ppp7_c	Pentose Phosphate Pathway	Astrocyte	Sedoheptulose-7-phosphate_A[c] + Glyceraldehyde-3-phosphate_A[c] <-> Fructose-6-phosphate_A[c] + Erythrose-4-phosphate_A[c]	Taldo1	EC-2.2.1.2
RA_ppp8_c	Pentose Phosphate Pathway	Astrocyte	Xylulose-5-phosphate_A[c] + Erythrose-4-phosphate_A[c] <-> Fructose-6-phosphate_A[c] + Glyceraldehyde-3-phosphate_A[c]	Tktl1 | Tktl2 | Tkt	EC-2.2.1.1
RN_ppp1_c	Pentose Phosphate Pathway	Neuron	Glucose-6-phosphate_N[c] + NADP_N[c] <-> 6-phosphoglucone_N[c] + NADPH_N[c]	G6pd2 | G6pdx	EC-1.1.1.49
RN_ppp2_c	Pentose Phosphate Pathway	Neuron	6-phosphoglucone_N[c] -> 6-phosphogluconate_N[c]	Pgls | H6pd	EC-3.1.1.31
RN_ppp3_c	Pentose Phosphate Pathway	Neuron	6-phosphogluconate_N[c] + NADP_N[c] -> Ribulose-5-phosphate_N[c] + NADPH_N[c] + CO2_N[c]	Pgd	EC-1.1.1.44
RN_ppp4_c	Pentose Phosphate Pathway	Neuron	Ribulose-5-phosphate_N[c] <-> Xylulose-5-phosphate_N[c]	Rpe	EC-5.1.3.1
RN_ppp5_c	Pentose Phosphate Pathway	Neuron	Ribulose-5-phosphate_N[c] <-> Ribose-5-phosphate_N[c]	Rpia	EC-5.3.1.6
RN_ppp6_c	Pentose Phosphate Pathway	Neuron	Ribose-5-phosphate_N[c] + Xylulose-5-phosphate_N[c] <-> Sedoheptulose-7-phosphate_N[c] + Glyceraldehyde-3-phosphate_N[c]	Tktl1 | Tktl2 | Tkt	EC-2.2.1.1
RN_ppp7_c	Pentose Phosphate Pathway	Neuron	Sedoheptulose-7-phosphate_N[c] + Glyceraldehyde-3-phosphate_N[c] <-> Fructose-6-phosphate_N[c] + Erythrose-4-phosphate_N[c]	Taldo1	EC-2.2.1.2
RN_ppp8_c	Pentose Phosphate Pathway	Neuron	Xylulose-5-phosphate_N[c] + Erythrose-4-phosphate_N[c] <-> Fructose-6-phosphate_N[c] + Glyceraldehyde-3-phosphate_N[c]	Tktl1 | Tktl2 | Tkt	EC-2.2.1.1
RA_tca1_m	TCA Cycle	Astrocyte	Oxoloacetate_A[m] + Acetyl-CoA_A[m] -> Citrate_A[m] + CoenzymeA_A[m]	Csl | Cs	EC-2.3.3.1
RA_tca2_m	TCA Cycle	Astrocyte	Citrate_A[m] <-> Cis_aconitate_A[m]	Aco2 | Aco1	EC-4.2.1.3
RA_tca3_c	TCA Cycle	Astrocyte	Citrate_A[c] <-> Cis_aconitate_A[c]	Aco1	EC-4.2.1.3
RA_tca4_m	TCA Cycle	Astrocyte	Cis_aconitate_A[m] <-> Isocitrate_A[m]	Aco2 | Aco1	EC-4.2.1.3
RA_tca5_c	TCA Cycle	Astrocyte	Cis_aconitate_A[c] <-> Isocitrate_A[c]	Aco1	EC-4.2.1.3
RA_tca6_c	TCA Cycle	Astrocyte	ATP_A[c] + Citrate_A[c] + CoenzymeA_A[c] -> Oxoloacetate_A[c] + Acetyl-CoA_A[c] + ADP_A[c] + phosphate_A[c]	Acly	EC-2.3.3.8
RA_tca7_c	TCA Cycle	Astrocyte	3S-citramalyl-CoA_A[c] <-> Acetyl-CoA_A[c] + Pyruvate_A[c]	Clybl	EC-4.1.3.25
RA_tca8_m	TCA Cycle	Astrocyte	Isocitrate_A[m] + NAD_A[m] -> alpha-ketoglutarate_A[m] + NADH_A[m] + CO2_A[m]	Idh3a & Idh3b & Idh3g & 4933405O20Rik	EC-1.1.1.41
RA_tca9_m	TCA Cycle	Astrocyte	Isocitrate_A[m] + NADP_A[m] -> alpha-ketoglutarate_A[m] + NADPH_A[m] + CO2_A[m]	Idh1 | Idh2	EC-1.1.1.42
RA_tca10_c	TCA Cycle	Astrocyte	Isocitrate_A[c] + NADP_A[c] -> alpha-ketoglutarate_A[c] + NADPH_A[c] + CO2_A[c]	Idh1 | Idh2	EC-1.1.1.42
RA_tca11_m	TCA Cycle	Astrocyte	alpha-ketoglutarate_A[m] + NAD_A[m] + CoenzymeA_A[m] -> Succinyl-CoA_A[m] + NADH_A[m] + CO2_A[m]	Dlst & Dld & ( Dhtkd1 | Ogdh )	EC-2.3.1.61 | EC-1.8.1.4 | EC-1.2.4.2
RA_tca12_m	TCA Cycle	Astrocyte	Succinyl-CoA_A[m] + ADP_A[m] + phosphate_A[m] <-> Succinate_A[m] + ATP_A[m] + CoenzymeA_A[m]	Suclg1 & Sucla2	EC-6.2.1.5
RA_tca13_m	TCA Cycle	Astrocyte	Succinate_A[m] + FAD_A[m] <-> Fumarate_A[m] + FADH2_A[m]	Sdha & Sdhb & Sdhc & Sdhd	EC-1.3.5.1 | EC-1.3.99.1
RA_tca14_m	TCA Cycle	Astrocyte	Fumarate_A[m] <-> Malate_A[m]	Fh1	EC-4.2.1.2
RA_tca15_m	TCA Cycle	Astrocyte	Malate_A[m] + NAD_A[m] -> Oxoloacetate_A[m] + NADH_A[m]	Mdh2	EC-1.1.1.37
RA_tca16_c	TCA Cycle	Astrocyte	Malate_A[c] + NAD_A[c] -> Oxoloacetate_A[c] + NADH_A[c]	Mdh1b | Mdh2	EC-1.1.1.37
RA_tca17_m	TCA Cycle	Astrocyte	NADP_A[m] + NADH_A[m] -> NADPH_A[m] + NAD_A[m]	Nnt	EC-1.6.1.2
RN_tca1_m	TCA Cycle	Neuron	Oxoloacetate_N[m] + Acetyl-CoA_N[m] -> Citrate_N[m] + CoenzymeA_N[m]	Csl | Cs	EC-2.3.3.1
RN_tca2_m	TCA Cycle	Neuron	Citrate_N[m] <-> Cis_aconitate_N[m]	Aco2 | Aco1	EC-4.2.1.3
RN_tca3_c	TCA Cycle	Neuron	Citrate_N[c] <-> Cis_aconitate_N[c]	Aco1	EC-4.2.1.3
RN_tca4_m	TCA Cycle	Neuron	Cis_aconitate_N[m] <-> Isocitrate_N[m]	Aco2 | Aco1	EC-4.2.1.3
RN_tca5_c	TCA Cycle	Neuron	Cis_aconitate_N[c] <-> Isocitrate_N[c]	Aco1	EC-4.2.1.3
RN_tca6_c	TCA Cycle	Neuron	ATP_N[c] + Citrate_N[c] + CoenzymeA_N[c] -> Oxoloacetate_N[c] + Acetyl-CoA_N[c] + ADP_N[c] + phosphate_N[c]	Acly	EC-2.3.3.8
RN_tca7_m	TCA Cycle	Neuron	Isocitrate_N[m] + NAD_N[m] -> alpha-ketoglutarate_N[m] + NADH_N[m] + CO2_N[m]	Idh3a & Idh3b & Idh3g & 4933405O20Rik	EC-1.1.1.41
RN_tca8_m	TCA Cycle	Neuron	Isocitrate_N[m] + NADP_N[m] -> alpha-ketoglutarate_N[m] + NADPH_N[m] + CO2_N[m]	Idh1 | Idh2	EC-1.1.1.42
RN_tca9_c	TCA Cycle	Neuron	Isocitrate_N[c] + NADP_N[c] -> alpha-ketoglutarate_N[c] + NADPH_N[c] + CO2_N[c]	Idh1 | Idh2	EC-1.1.1.42
RN_tca10_m	TCA Cycle	Neuron	alpha-ketoglutarate_N[m] + NAD_N[m] + CoenzymeA_N[m] -> Succinyl-CoA_N[m] + NADH_N[m] + CO2_N[m]	Dlst & Dld & ( Dhtkd1 | Ogdh )	EC-2.3.1.61 | EC-1.8.1.4 | EC-1.2.4.2
RN_tca11_m	TCA Cycle	Neuron	Succinyl-CoA_N[m] + ADP_N[m] + phosphate_N[m] <-> Succinate_N[m] + ATP_N[m] + CoenzymeA_N[m]	Suclg1 & Sucla2	EC-6.2.1.5
RN_tca12_m	TCA Cycle	Neuron	Succinate_N[m] + FAD_N[m] <-> Fumarate_N[m] + FADH2_N[m]	Sdha & Sdhb & Sdhc & Sdhd	EC-1.3.5.1 | EC-1.3.99.1
RN_tca13_m	TCA Cycle	Neuron	Fumarate_N[m] <-> Malate_N[m]	Fh1	EC-4.2.1.2
RN_tca14_m	TCA Cycle	Neuron	Malate_N[m] + NAD_N[m] -> Oxoloacetate_N[m] + NADH_N[m]	Mdh2	EC-1.1.1.37
RN_tca15_c	TCA Cycle	Neuron	Oxoloacetate_N[c] + NADH_N[c] -> Malate_N[c] + NAD_N[c]	Mdh1b | Mdh2	EC-1.1.1.37
RN_tca16_m	TCA Cycle	Neuron	NADP_N[m] + NADH_N[m] -> NADPH_N[m] + NAD_N[m]	Nnt	EC-1.6.1.2
RA_oxd1_m	Oxidative Phosphorylation and ATPase	Astrocyte	NADH_A[m] + Ubiquinone_A[m] -> NAD_A[m] + Ubiquinol_A[m] + 4 Hc_A[m]	1700029P11Rik & Ndufa1 & Ndufa2 & Ndufa3 & Ndufa4 & Ndufa4l2 & Ndufa5 & Ndufa6 & Ndufa7 & Ndufa8 & Ndufa9 & Ndufa10 & Ndufa11 & Ndufa12 & Ndufa13 & Ndufab1 & Ndufaf1 & Ndufaf2 & Ndufaf3 & Ndufaf4 & Gm2695 & Ndufb2 & Ndufb3 & Ndufb4 & Ndufb5 & Ndufb6 & Ndufb7 & Ndufb8 & Ndufb9 & Ndufb10 & Ndufb11 & Ndufc1 & Ndufc2 & Ndufs1 & Ndufs2 & Ndufs3 & Ndufs4 & Ndufs5 & Ndufs6 & Ndufs7 & Ndufs8 & Ndufv1 & N…	EC-1.6.5.3
RA_oxd2_m	Oxidative Phosphorylation and ATPase	Astrocyte	Ubiquinol_A[m] + CytCox_A[m] -> Ubiquinone_A[m] + CytCred_A[m] + 4 Hc_A[m]	mt-Cytb & Uqcr10 & Cyc1 & Uqcrb & Uqcrc1 & Uqcrc2 & Uqcrh & Uqcrq & Uqcrfs1	EC-1.10.2.2
RA_oxd3_m	Oxidative Phosphorylation and ATPase	Astrocyte	CytCred_A[m] + 0.5 O2_A[m] -> CytCox_A[m] + 2 Hc_A[m]	mt-Co1 & mt-Co2 & mt-Co3 & Cox5a & Cox5b & Cox6c & Cox7c	EC-1.9.3.1
RA_oxd4_m	Oxidative Phosphorylation and ATPase	Astrocyte	FADH2_A[m] + Ubiquinone_A[m] -> FAD_A[m] + Ubiquinol_A[m]	Etfdh	EC-1.5.5.1
RA_oxd5_m	Oxidative Phosphorylation and ATPase	Astrocyte	ADP_A[m] + 4 Hc_A[m] + phosphate_A[m] -> ATP_A[m]	Atp5md & Atp5mpl & Atp5a1 & Atp5b & Atp5c1 & Atp5d & Atp5e & Atp5o & mt-Atp6 & mt-Atp8 & Atp5f1 & Atp5h & Atp5k & Atp5l	EC-3.6.3.14
RN_oxd1_m	Oxidative Phosphorylation and ATPase	Neuron	NADH_N[m] + Ubiquinone_N[m] -> NAD_N[m] + Ubiquinol_N[m] + 4 Hc_N[m]	1700029P11Rik & Ndufa1 & Ndufa2 & Ndufa3 & Ndufa4 & Ndufa4l2 & Ndufa5 & Ndufa6 & Ndufa7 & Ndufa8 & Ndufa9 & Ndufa10 & Ndufa11 & Ndufa12 & Ndufa13 & Ndufab1 & Ndufaf1 & Ndufaf2 & Ndufaf3 & Ndufaf4 & Gm2695 & Ndufb2 & Ndufb3 & Ndufb4 & Ndufb5 & Ndufb6 & Ndufb7 & Ndufb8 & Ndufb9 & Ndufb10 & Ndufb11 & Ndufc1 & Ndufc2 & Ndufs1 & Ndufs2 & Ndufs3 & Ndufs4 & Ndufs5 & Ndufs6 & Ndufs7 & Ndufs8 & Ndufv1 & N…	EC-1.6.5.3
RN_oxd2_m	Oxidative Phosphorylation and ATPase	Neuron	Ubiquinol_N[m] + CytCox_N[m] -> Ubiquinone_N[m] + CytCred_N[m] + 4 Hc_N[m]	mt-Cytb & Uqcr10 & Cyc1 & Uqcrb & Uqcrc1 & Uqcrc2 & Uqcrh & Uqcrq & Uqcrfs1	EC-1.10.2.2
RN_oxd3_m	Oxidative Phosphorylation and ATPase	Neuron	CytCred_N[m] + 0.5 O2_N[m] -> CytCox_N[m] + 2 Hc_N[m]	mt-Co1 & mt-Co2 & mt-Co3 & Cox5a & Cox5b & Cox6c & Cox7c	EC-1.9.3.1
RN_oxd4_m	Oxidative Phosphorylation and ATPase	Neuron	FADH2_N[m] + Ubiquinone_N[m] -> FAD_N[m] + Ubiquinol_N[m]	Etfdh	EC-1.5.5.1
RN_oxd5_m	Oxidative Phosphorylation and ATPase	Neuron	ADP_N[m] + 4 Hc_N[m] + phosphate_N[m] -> ATP_N[m]	Atp5md & Atp5mpl & Atp5a1 & Atp5b & Atp5c1 & Atp5d & Atp5e & Atp5o & mt-Atp6 & mt-Atp8 & Atp5f1 & Atp5h & Atp5k & Atp5l	EC-3.6.3.14
RA_ggc1_m	Glutamate-Glutamine Synthesis	Astrocyte	alpha-ketoglutarate_A[m] + NH4_A[m] + NADH_A[m] <-> Glutamate_A[m] + NAD_A[m]	Glud1 | Glud-ps	EC-1.4.1.3
RA_ggc2_m	Glutamate-Glutamine Synthesis	Astrocyte	alpha-ketoglutarate_A[m] + NH4_A[m] + NADPH_A[m] <-> Glutamate_A[m] + NADP_A[m]	Glud1 | Glud-ps	EC-1.4.1.3
RN_ggc1_m	Glutamate-Glutamine Synthesis	Neuron	alpha-ketoglutarate_N[m] + NH4_N[m] + NADH_N[m] <-> Glutamate_N[m] + NAD_N[m]	Glud1 | Glud-ps	EC-1.4.1.3
RN_ggc2_m	Glutamate-Glutamine Synthesis	Neuron	alpha-ketoglutarate_N[m] + NH4_N[m] + NADPH_N[m] <-> Glutamate_N[m] + NADP_N[m]	Glud1 | Glud-ps	EC-1.4.1.3
RA_ggc3_c	Glutamate-Glutamine Synthesis	Astrocyte	Glutamate_A[c] + NH4_A[c] + ATP_A[c] -> Glutamine_A[c] + ADP_A[c] + phosphate_A[c]	Lgsn | Glns-ps1 | Glul	EC-6.3.1.2
RAN_t2_c	Glutamate - Glutamine Cycle	Intercellular	Glutamate_N[c] + ATP_A[c] -> Glutamate_A[c] + ADP_A[c] + phosphate_A[c]	Slc1a4 | Slc1a5 | Slc38a7 | Slc38a8 | Slc38a1 | Slc38a2
RAN_t3_c	Glutamate - Glutamine Cycle	Intercellular	Glutamine_A[c] -> Glutamine_N[c]	Slc1a4 | Slc1a5 | Slc6a14 | Slc6a19 | Slc7a5 & Slc3a2 | Slc7a6 & Slc3a2 | Slc7a7 & Slc3a2 | Slc7a8 & Slc3a2 | Slc38a1 | Slc38a2 |Slc38a3 | Slc38a5 | Slc38a7 | Slc38a8
RN_ggc3_m	Glutamate - Glutamine Cycle	Neuron	Glutamine_N[m] -> Glutamate_N[m] + NH4_N[m]	Gls | Gls2	EC-3.5.1.2
RN_gaba1_c	GABA Cycle	Neuron	Glutamate_N[c] -> GABA_N[c] + CO2_N[c]	Gad1 | Gad2	EC-4.1.1.15
RAN_t4_c	GABA Cycle	Intercellular	GABA_N[c] <-> GABA_A[c]	Slc6a14 | Slc6a19 | Slc6a1 | Slc6a11 | Slc6a12 | Slc32a1
RA_gaba1_m	GABA Cycle	Astrocyte	GABA_A[m] + alpha-ketoglutarate_A[m] -> Glutamate_A[m] + SuccinateSAL_A[m]	Abat	EC-2.6.1.19
RA_gaba2_m	GABA Cycle	Astrocyte	SuccinateSAL_A[m] + NAD_A[m] -> NADH_A[m] + Succinate_A[m]	Aldh5a1	EC-1.2.1.24
RN_gaba2_m	GABA Cycle	Neuron	GABA_N[m] + alpha-ketoglutarate_N[m] -> Glutamate_N[m] + SuccinateSAL_N[m]	Abat	EC-2.6.1.19
RN_gaba3_m	GABA Cycle	Neuron	SuccinateSAL_N[m] + NAD_N[m] -> NADH_N[m] + Succinate_N[m]	Aldh5a1	EC-1.2.1.24
RA_asp1_m	Aspartate-Asparagine Metabolism	Astrocyte	Oxoloacetate_A[m] + Glutamate_A[m] <-> Aspartate_A[m] + alpha-ketoglutarate_A[m]	Got2	EC-2.6.1.1
RA_asp2_c	Aspartate-Asparagine Metabolism	Astrocyte	Oxoloacetate_A[c] + Glutamate_A[c] <-> Aspartate_A[c] + alpha-ketoglutarate_A[c]	Got1l1 | Got1	EC-2.6.1.1
RA_asp3_c	Aspartate-Asparagine Metabolism	Astrocyte	Glutamine_A[c] + Aspartate_A[c] + ATP_A[c] <-> Glutamate_A[c] + Asparagine_A[c] + AMP_A[c] + diphosphate_A[c]	Asnsd1 | Asns	EC-6.3.5.4
RN_asp1_m	Aspartate-Asparagine Metabolism	Neuron	Oxoloacetate_N[m] + Glutamate_N[m] <-> Aspartate_N[m] + alpha-ketoglutarate_N[m]	Got2	EC-2.6.1.1
RN_asp2_c	Aspartate-Asparagine Metabolism	Neuron	Oxoloacetate_N[c] + Glutamate_N[c] <-> Aspartate_N[c] + alpha-ketoglutarate_N[c]	Got1l1 | Got1	EC-2.6.1.1
RN_asp3_c	Aspartate-Asparagine Metabolism	Neuron	Glutamine_N[c] + Aspartate_N[c] + ATP_N[c] <-> Glutamate_N[c] + Asparagine_N[c] + AMP_N[c] + diphosphate_N[c]	Asnsd1 | Asns	EC-6.3.5.4
RAN_t5_c	Aspartate-Asparagine Metabolism	Intercellular	Aspartate_N[c] <-> Aspartate_A[c]
RA_hist1_c	Histamine Metabolism	Astrocyte	Histidine_A[c] <-> Histamine_A[c] + CO2_A[c]	Hdc	EC-4.1.1.22
RA_hist2_c	Histamine Metabolism	Astrocyte	Histamine_A[c] + S-adenosyl-L-methionine_A[c] -> S-adenosyl-L-homocysteine_A[c] + methylhistamine_A[c]	Hnmt	EC-2.1.1.8
RN_hist1_c	Histamine Metabolism	Neuron	Histidine_N[c] <-> Histamine_N[c] + CO2_N[c]	Hdc	EC-4.1.1.22
RN_hist2_c	Histamine Metabolism	Neuron	Histamine_N[c] + S-adenosyl-L-methionine_N[c] -> S-adenosyl-L-homocysteine_N[c] + methylhistamine_N[c]	Hnmt	EC-2.1.1.8
RA_ala1_c	Alanine Metabolism	Astrocyte	Pyruvate_A[c] + Glutamate_A[c] <-> alpha-ketoglutarate_A[c] + Alanine_A[c]	Gpt	EC-2.6.1.2
RA_ala2_m	Alanine Metabolism	Astrocyte	Pyruvate_A[m] + Glutamate_A[m] <-> alpha-ketoglutarate_A[m] + Alanine_A[m]	Gpt | Gpt2	EC-2.6.1.2
RN_ala1_c	Alanine Metabolism	Neuron	Pyruvate_N[c] + Glutamate_N[c] <-> alpha-ketoglutarate_N[c] + Alanine_N[c]	Gpt	EC-2.6.1.2
RN_ala2_m	Alanine Metabolism	Neuron	Pyruvate_N[m] + Glutamate_N[m] <-> alpha-ketoglutarate_N[m] + Alanine_N[m]	Gpt | Gpt2	EC-2.6.1.2
RAN_t6_c	Alanine Metabolism	Intercellular	Alanine_N[c] <-> Alanine_A[c]	Slc1a4 | Slc1a5 | Slc38a1 | Slc38a2 |Slc38a3 | Slc38a5 | Slc38a7 | Slc38a8
RA_gly-ser1_c	Glycine-Serine Metabolism	Astrocyte	3-phosphoglycerate_A[c] + NAD_A[c] <-> 3-phosphohydroxypyruvate_A[c] + NADH_A[c]	Phgdh	EC-1.1.1.95
RA_gly-ser2_c	Glycine-Serine Metabolism	Astrocyte	3-phosphohydroxypyruvate_A[c] + Glutamate_A[c] <-> 3_phospho_serine_A[c] + alpha-ketoglutarate_A[c]	Psat1	EC-2.6.1.52
RA_gly-ser3_c	Glycine-Serine Metabolism	Astrocyte	3_phospho_serine_A[c] -> Serine_A[c] + phosphate_A[c]	Psph | Vps29	EC-3.1.3.3
RA_gly-ser4_c	Glycine-Serine Metabolism	Astrocyte	Serine_A[c] -> Pyruvate_A[c] + NH4_A[c]	Sds | Sdsl	EC-4.3.1.17
RAN_t7_c	Glycine-Serine Metabolism	Intercellular	Serine_A[c] -> Serine_N[c]	Slc1a4 | Slc1a5 |Slc38a3 | Slc38a5 | Slc6a14 | Slc7a8 & Slc7a5 | Slc38a2 | Slc38a4
RN_gly-ser1_c	Glycine-Serine Metabolism	Neuron	Serine_N[c] + tetrahydrofolate_N[c] -> Glycine_N[c]	Shmt1	EC-2.1.2.1
RN_gly-ser2_m	Glycine-Serine Metabolism	Neuron	Serine_N[m] + tetrahydrofolate_N[m] -> Glycine_N[m]	Shmt2	EC-2.1.2.1
RAN_t8_c	Glycine-Serine Metabolism	Intercellular	Glycine_N[c] -> Glycine_A[c]	Slc6a14 | Slc6a19 | Slc36a2 | Slc16a8 | Slc38a5 | Slc36a1 | Slc36a2 | Slc38a1 | Slc38a4 | Slc7a10
RA_gly-ser5_m	Glycine-Serine Metabolism	Astrocyte	Glycine_A[m] + NAD_A[m] + tetrahydrofolate_A[m] -> CO2_A[m] + NH4_A[m] + NADH_A[m]	Gldc & Amt & Dld	EC-1.4.4.2 | EC-2.1.2.10 | EC-1.8.1.4
RA_gly-ser6_c	Glycine-Serine Metabolism	Astrocyte	Glycine_A[c] -> tetrahydrofolate_A[c] + Serine_A[c]	Shmt1	EC-2.1.2.1
RA_gly-ser7_m	Glycine-Serine Metabolism	Astrocyte	Glycine_A[m] -> tetrahydrofolate_A[m] + Serine_A[m]	Shmt2	EC-2.1.2.1
RA_leu1_m	Leucine Metabolism	Astrocyte	Leucine_A[m] + alpha-ketoglutarate_A[m] <-> alpha-ketoisocaproate_A[m] + Glutamate_A[m]	Bcat1 | Bcat2	EC-2.6.1.42
RA_leu2_c	Leucine Metabolism	Astrocyte	alpha-ketoisocaproate_A[c] + Glutamate_A[c] <-> Leucine_A[c] + alpha-ketoglutarate_A[c]	Bcat1	EC-2.6.1.42
RA_leu3_m	Leucine Metabolism	Astrocyte	alpha-ketoisocaproate_A[m] + NAD_A[m] + CoenzymeA_A[m] -> Isovaleryl-CoA_A[m] + CO2_A[m] + NADH_A[m]
RA_leu4_m	Leucine Metabolism	Astrocyte	Isovaleryl-CoA_A[m] + FAD_A[m] <-> 3_methylcrotonyl-Coa_A[m] + FADH2_A[m]	Ivd	EC-1.3.99.10
RA_leu5_m	Leucine Metabolism	Astrocyte	Bicarbonate_A[m] + 3_methylcrotonyl-Coa_A[m] + ATP_A[m] <-> ADP_A[m] + 3_methylglutaconyl-Coa_A[m] + phosphate_A[m]	Mccc1 & Mccc2	EC-6.4.1.4
RA_leu6_m	Leucine Metabolism	Astrocyte	3_methylglutaconyl-Coa_A[m] <-> 3_hydroxy_3_methylglutaryl-Coa_A[m]	Auh	EC-4.2.1.18
RA_leu7_m	Leucine Metabolism	Astrocyte	3_hydroxy_3_methylglutaryl-Coa_A[m] <-> Acetoacetate_A[m] + Acetyl-CoA_A[m]	Hmgcll1 | Hmgcll	EC-4.1.3.4
RAN_t9_c	Leucine Metabolism	Intercellular	alpha-ketoisocaproate_A[c] -> alpha-ketoisocaproate_N[c]
RN_leu1_m	Leucine Metabolism	Neuron	alpha-ketoisocaproate_N[m] + Glutamate_N[m] <-> Leucine_N[m] + alpha-ketoglutarate_N[m]	Bcat1 | Bcat2	EC-2.6.1.42
RN_leu2_c	Leucine Metabolism	Neuron	alpha-ketoisocaproate_N[c] + Glutamate_N[c] <-> Leucine_N[c] + alpha-ketoglutarate_N[c]	Bcat1	EC-2.6.1.42
RAN_t10_c	Leucine Metabolism	Intercellular	Leucine_N[c] -> Leucine_A[c]	Slc7a5 & Slc3a2 | Slc7a8 & Slc3a2 | Slc6a15 | Slc7a5 | Slc43a1 | Slc43a2 | Slc7a7 | Slc7a6
RA_val1_m	Valine Metabolism	Astrocyte	Valine_A[m] + alpha-ketoglutarate_A[m] <-> alpha-keto-isovalerate_A[m] + Glutamate_A[m]	Bcat1 | Bcat2	EC-2.6.1.42
RA_val2_c	Valine Metabolism	Astrocyte	alpha-keto-isovalerate_A[c] + Glutamate_A[c] <-> Valine_A[c] + alpha-ketoglutarate_A[c]	Bcat1	EC-2.6.1.42
RA_val3_m	Valine Metabolism	Astrocyte	alpha-keto-isovalerate_A[m] + NAD_A[m] + CoenzymeA_A[m] -> Isobutyryl-CoA_A[m] + CO2_A[m] + NADH_A[m]	Bckdha & Bckdhb & Dld & Dbt	EC-1.8.1.4 | EC-1.2.4.4 | EC-2.3.1.168 | EC-1.2.1.25
RA_val4_m	Valine Metabolism	Astrocyte	Isobutyryl-CoA_A[m] + FAD_A[m] -> FADH2_A[m] + methylacrylyl-CoA_A[m]	Acad8	EC-1.3.99.12
RA_val5_m	Valine Metabolism	Astrocyte	methylacrylyl-CoA_A[m] -> S-3-hydroxy-isobutyryl-CoA_A[m]	Ehhadh | Echs1	EC-4.2.1.17
RA_val6_m	Valine Metabolism	Astrocyte	S-3-hydroxy-isobutyryl-CoA_A[m] -> S-3-hydroxy-isobutyrate_A[m] + CoenzymeA_A[m]	Hibch	EC-3.1.2.4
RA_val7_m	Valine Metabolism	Astrocyte	S-3-hydroxy-isobutyrate_A[m] + NAD_A[m] -> S-methylmalonate-semialdehyde_A[m] + NADH_A[m]	Hibadh	EC-1.1.1.31
RA_val8_m	Valine Metabolism	Astrocyte	S-methylmalonate-semialdehyde_A[m] + NAD_A[m] + CoenzymeA_A[m] -> NADH_A[m] + Propionyl-CoA_A[m] + Bicarbonate_A[m]	Aldh6a1 | Mmsdh	EC-1.2.1.27
RA_val9_m	Valine Metabolism | Isoleucine Metabolism	Astrocyte	Propionyl-CoA_A[m] + Bicarbonate_A[m] + ATP_A[m] -> S-methylmalonyl-CoA_A[m] + ADP_A[m] + phosphate_A[m]	Pccb & Pcca	EC-6.4.1.3
RA_val10_m	Valine Metabolism | Isoleucine Metabolism	Astrocyte	S-methylmalonyl-CoA_A[m] -> R-methylmalonyl-CoA_A[m]	Mcee	EC-5.1.99.1
RA_val11_m	Valine Metabolism | Isoleucine Metabolism	Astrocyte	R-methylmalonyl-CoA_A[m] -> Succinyl-CoA_A[m]	Mut	EC-5.4.99.2
RAN_t11_c	Valine Metabolism	Intercellular	alpha-keto-isovalerate_A[c] -> alpha-keto-isovalerate_N[c]
RN_val1_m	Valine Metabolism	Neuron	alpha-keto-isovalerate_N[m] + Glutamate_N[m] <-> Valine_N[m] + alpha-ketoglutarate_N[m]	Bcat1 | Bcat2	EC-2.6.1.42
RN_val2_c	Valine Metabolism	Neuron	alpha-keto-isovalerate_N[c] + Glutamate_N[c] <-> Valine_N[c] + alpha-ketoglutarate_N[c]	Bcat1	EC-2.6.1.42
RAN_t12_c	Valine Metabolism	Intercellular	Valine_N[c] -> Valine_A[c]	Slc7a5 & Slc3a2 | Slc7a8 & Slc3a2 | Slc6a15 | Slc7a5 | Slc43a1 | Slc43a2
RA_ileu1_m	Isoleucine Metabolism	Astrocyte	Isoleucine_A[m] + alpha-ketoglutarate_A[m] <-> alpha-keto-methylvalerate_A[m] + Glutamate_A[m]	Bcat1 | Bcat2	EC-2.6.1.42
RA_ileu2_c	Isoleucine Metabolism	Astrocyte	alpha-keto-methylvalerate_A[c] + Glutamate_A[c] <-> Isoleucine_A[c] + alpha-ketoglutarate_A[c]	Bcat1	EC-2.6.1.42
RA_ileu3_m	Isoleucine Metabolism	Astrocyte	alpha-keto-methylvalerate_A[m] + NAD_A[m] + CoenzymeA_A[m] -> Methylbutyryl-CoA_A[m] + CO2_A[m] + NADH_A[m]	Bckdha & Bckdhb	EC-1.2.4.4
RA_ileu4_m	Isoleucine Metabolism	Astrocyte	Methylbutyryl-CoA_A[m] + FAD_A[m] -> FADH2_A[m] + E-2-methylcrotonoyl-CoA_A[m]	Acadsb	EC-1.3.99.12
RA_ileu5_m	Isoleucine Metabolism	Astrocyte	E-2-methylcrotonoyl-CoA_A[m] -> 2-methyl-3-hydroxybutyryl-CoA_A[m]	Ehhadh | Echs1	EC-4.2.1.17
RA_ileu6_m	Isoleucine Metabolism	Astrocyte	2-methyl-3-hydroxybutyryl-CoA_A[m] + NAD_A[m] -> NADH_A[m] + 2-methylacetoacetyl-CoA_A[m]	Hsd17b10	EC-1.1.1.178
RA_ileu7_m	Isoleucine Metabolism	Astrocyte	2-methylacetoacetyl-CoA_A[m] + CoenzymeA_A[m] <-> Propionyl-CoA_A[m] + Acetyl-CoA_A[m]	Acat1 | Acat2	EC-2.3.1.9
RAN_t13_c	Isoleucine Metabolism	Intercellular	alpha-keto-methylvalerate_A[c] -> alpha-keto-methylvalerate_N[c]
RN_ileu1_m	Isoleucine Metabolism	Neuron	alpha-keto-methylvalerate_N[m] + Glutamate_N[m] <-> Isoleucine_N[m] + alpha-ketoglutarate_N[m]	Bcat1 | Bcat2	EC-2.6.1.42
RN_ileu2_c	Isoleucine Metabolism	Neuron	alpha-keto-methylvalerate_N[c] + Glutamate_N[c] <-> Isoleucine_N[c] + alpha-ketoglutarate_N[c]	Bcat1	EC-2.6.1.42
RAN_t14_c	Isoleucine Metabolism	Intercellular	Isoleucine_N[c] -> Isoleucine_A[c]	Slc7a5 & Slc3a2 | Slc7a8 & Slc3a2 | Slc6a15 | Slc7a5 | Slc7a5 | Slc43a1 | Slc43a2
RA_lys1_m	Lysine Metabolism	Astrocyte	Lysine_A[m] + alpha-ketoglutarate_A[m] + NADPH_A[m] -> Saccharopine_A[m] + NADP_A[m]	Aass	EC-1.5.1.8
RA_lys2_m	Lysine Metabolism	Astrocyte	Saccharopine_A[m] + NAD_A[m] -> Glutamate_A[m] + NADH_A[m] + 2-aminoadipate_semialdehyde_A[m]	Sccpdh | Aass	EC-1.5.1.9
RA_lys3_m	Lysine Metabolism	Astrocyte	2-aminoadipate_semialdehyde_A[m] <-> S-2,3,4,5-tetrahydropiperidine-2-carboxylate_A[m]	Aasdh	EC-1.2.1.31
RA_lys4_m	Lysine Metabolism	Astrocyte	S-2,3,4,5-tetrahydropiperidine-2-carboxylate_A[m] + NAD_A[m] -> 2-aminoadipate_A[m] + NADH_A[m]	Aasdh	EC-1.2.1.31
RA_lys5_m	Lysine Metabolism	Astrocyte	2-aminoadipate_A[m] + alpha-ketoglutarate_A[m] -> alpha-ketoadipate_A[m] + Glutamate_A[m]	Aadat	EC-2.6.1.39
RA_lys6_m	Lysine Metabolism	Astrocyte	alpha-ketoadipate_A[m] + NAD_A[m] + CoenzymeA_A[m] -> CO2_A[m] + NADH_A[m] + glutaryl-CoA_A[m]	Ogdh
RA_lys7_c	Lysine Metabolism	Astrocyte	alpha-ketoadipate_A[c] + NAD_A[c] + CoenzymeA_A[c] -> CO2_A[c] + NADH_A[c] + glutaryl-CoA_A[c]	Ogdh
RA_lys8_m	Lysine Metabolism	Astrocyte	FAD_A[m] + glutaryl-CoA_A[m] -> glutaconyl-CoA_A[m] + FADH2_A[m]		EC-1.3.8-
RA_lys9_m	Lysine Metabolism	Astrocyte	glutaconyl-CoA_A[m] -> CO2_A[m] + crotonyl-CoA_A[m]
RA_lys10_m	Lysine Metabolism	Astrocyte	crotonyl-CoA_A[m] -> S-3-hydroxybutanoyl-CoA_A[m]	Echs1	EC-4.2.1.-
RA_lys11_m	Lysine Metabolism	Astrocyte	S-3-hydroxybutanoyl-CoA_A[m] + NAD_A[m] <-> Acetoacetyl-CoA_A[m] + NADH_A[m]	Hadh | Ehhadh | Hsd17b4 | Hsd17b10	EC-1.1.1.35
RN_lys1_m	Lysine Metabolism	Neuron	Lysine_N[m] + alpha-ketoglutarate_N[m] + NADPH_N[m] -> Saccharopine_N[m] + NADP_N[m]	Aass	EC-1.5.1.8
RN_lys2_m	Lysine Metabolism	Neuron	Saccharopine_N[m] + NAD_N[m] -> Glutamate_N[m] + NADH_N[m] + 2-aminoadipate_semialdehyde_N[m]	Sccpdh | Aass	EC-1.5.1.9
RN_lys3_m	Lysine Metabolism	Neuron	2-aminoadipate_semialdehyde_N[m] <-> S-2,3,4,5-tetrahydropiperidine-2-carboxylate_N[m]	Aasdh	EC-1.2.1.31
RN_lys4_m	Lysine Metabolism	Neuron	S-2,3,4,5-tetrahydropiperidine-2-carboxylate_N[m] + NAD_N[m] -> 2-aminoadipate_N[m] + NADH_N[m]	Aasdh	EC-1.2.1.31
RN_lys5_m	Lysine Metabolism	Neuron	2-aminoadipate_N[m] + alpha-ketoglutarate_N[m] -> alpha-ketoadipate_N[m] + Glutamate_N[m]	Aadat	EC-2.6.1.39
RN_lys6_m	Lysine Metabolism	Neuron	alpha-ketoadipate_N[m] + NAD_N[m] + CoenzymeA_N[m] -> CO2_N[m] + NADH_N[m] + glutaryl-CoA_N[m]	Ogdh	[]
RN_lys7_c	Lysine Metabolism	Neuron	alpha-ketoadipate_N[c] + NAD_N[c] + CoenzymeA_N[c] -> CO2_N[c] + NADH_N[c] + glutaryl-CoA_N[c]	Ogdh	[]
RN_lys8_m	Lysine Metabolism	Neuron	FAD_N[m] + glutaryl-CoA_N[m] -> glutaconyl-CoA_N[m] + FADH2_N[m]		EC-1.3.8-
RN_lys9_m	Lysine Metabolism	Neuron	glutaconyl-CoA_N[m] -> CO2_N[m] + crotonyl-CoA_N[m]		EC-4.1.1.70
RN_lys10_m	Lysine Metabolism	Neuron	crotonyl-CoA_N[m] -> S-3-hydroxybutanoyl-CoA_N[m]	Echs1	EC-4.2.1.-
RN_lys11_m	Lysine Metabolism	Neuron	S-3-hydroxybutanoyl-CoA_N[m] + NAD_N[m] -> Acetoacetyl-CoA_N[m] + NADH_N[m]	Hadh | Ehhadh | Hsd17b4 | Hsd17b10	EC-1.1.1.35
RA_phe-tyr1_c	Phenylalanine-Tyrosine Metabolism	Astrocyte	Phenylalanine_A[c] + Tetrahydrobiopterin_A[c] + O2_A[c] -> Tyrosine_A[c] + 4-alpha-hydroxy-tetrahydrobiopterin_A[c]	Paics | Pcbd1 | Pah	EC-1.14.16.1
RA_phe-tyr2_c	Phenylalanine-Tyrosine Metabolism	Astrocyte	4-alpha-hydroxy-tetrahydrobiopterin_A[c] -> Dihydrobiopterin_A[c]	Pcbd1 | Pcbd2	EC-4.2.1.96
RA_phe-tyr3_c	Phenylalanine-Tyrosine Metabolism	Astrocyte	Dihydrobiopterin_A[c] + NADH_A[c] -> Tetrahydrobiopterin_A[c] + NAD_A[c]	Qdpr	EC-1.5.1.34
RN_phe-tyr1_c	Phenylalanine-Tyrosine Metabolism	Neuron	Phenylalanine_N[c] + Tetrahydrobiopterin_N[c] + O2_N[c] -> Tyrosine_N[c] + 4-alpha-hydroxy-tetrahydrobiopterin_N[c]	Paics | Pcbd1 | Pah	EC-1.14.16.1
RN_phe-tyr2_c	Phenylalanine-Tyrosine Metabolism	Neuron	4-alpha-hydroxy-tetrahydrobiopterin_N[c] -> Dihydrobiopterin_N[c]	Pcbd1 | Pcbd2	EC-4.2.1.96
RN_phe-tyr3_c	Phenylalanine-Tyrosine Metabolism	Neuron	Dihydrobiopterin_N[c] + NADH_N[c] -> Tetrahydrobiopterin_N[c] + NAD_N[c]	Qdpr	EC-1.5.1.34
RN_phe-tyr4_c	Phenylalanine-Tyrosine Metabolism	Neuron	Tyrosine_N[c] + Tetrahydrobiopterin_N[c] + O2_N[c] -> L-DOPA_N[c] + 4-alpha-hydroxy-tetrahydrobiopterin_N[c]	Th	EC-1.14.16.2
RN_phe-tyr5_c	Phenylalanine-Tyrosine Metabolism	Neuron	L-DOPA_N[c] -> Dopamine_N[c] + CO2_N[c]	Ddc	EC-4.1.1.28
RN_phe-tyr6_c	Phenylalanine-Tyrosine Metabolism	Neuron	Dopamine_N[c] + O2_N[c] -> Norepinephrine_N[c]	Moxd1 | Moxd2 | Dbh	EC-1.14.17.1
RN_phe-tyr7_c	Phenylalanine-Tyrosine Metabolism	Neuron	Norepinephrine_N[c] + S-adenosyl-L-methionine_N[c] -> S-adenosyl-L-homocysteine_N[c] + Epinephrine_N[c]	Pnmt	EC-2.1.1.28
RAN_t15_c	Phenylalanine-Tyrosine Metabolism	Intercellular	Dopamine_N[c] -> Dopamine_A[c]
RA_phe-tyr4_c	Phenylalanine-Tyrosine Metabolism	Astrocyte	Dopamine_A[c] + O2_A[c] -> Norepinephrine_A[c]	Moxd1 | Moxd2 | Dbh	EC-1.14.17.1
RA_da1_c	Dopamine Degradation	Astrocyte	Dopamine_A[c] + O2_A[c] -> 3,4-Dihydroxyphenylacetaldehyde_A[c] + NH4_A[c] + H2O2_A[c]	Maoa | Maob	EC-1.4.3.4
RA_da2_c	Dopamine Degradation	Astrocyte	3,4-Dihydroxyphenylacetaldehyde_A[c] + NAD_A[c] -> 3,4-Dihydroxyphenylacetate_A[c] + NADH_A[c]	Aldh1a7 | Aldh2	EC-1.2.1.3
RA_da3_c	Dopamine Degradation	Astrocyte	S-adenosyl-L-methionine_A[c] + 3,4-Dihydroxyphenylacetate_A[c] -> S-adenosyl-L-homocysteine_A[c] + Homovanillate_A[c]	Tomt | Comt1	EC-2.1.1.6
RA_da4_c	Dopamine Degradation	Astrocyte	S-adenosyl-L-methionine_A[c] + Dopamine_A[c] -> S-adenosyl-L-homocysteine_A[c] + 3-Methoxytyramine_A[c]	Tomt | Comt1 | Comtd1	EC-2.1.1.6
RA_da5_c	Dopamine Degradation	Astrocyte	3-Methoxytyramine_A[c] + O2_A[c] <-> 3-Methoxy-4-hydroxyphenylacetaldehyde_A[c] + NH4_A[c] + H2O2_A[c]		EC-1.4.3.3
RA_da6_c	Dopamine Degradation	Astrocyte	3-Methoxy-4-hydroxyphenylacetaldehyde_A[c] + NAD_A[c] -> Homovanillate_A[c] + NADH_A[c]	Aldh3b1 | Aldh3a1 | Aldh1a3	EC-1.2.1.5
RN_da1_c	Dopamine Degradation	Neuron	Dopamine_N[c] + O2_N[c] -> 3,4-Dihydroxyphenylacetaldehyde_N[c] + NH4_N[c] + H2O2_N[c]	Maoa | Maob	EC-1.4.3.4
RN_da2_c	Dopamine Degradation	Neuron	3,4-Dihydroxyphenylacetaldehyde_N[c] + NAD_N[c] -> 3,4-Dihydroxyphenylacetate_N[c] + NADH_N[c]	Aldh1a7 | Aldh2	EC-1.2.1.3
RN_nm1_c	Neuromelanin Synthesis	Neuron	Tyrosine_N[c] + O2_A[c] -> Dopaquinone_N[c]	Tyr	EC-1.14.18.1
RN_nm2_c	Neuromelanin Synthesis	Neuron	2 L-DOPA_N[c] + O2_A[c] -> 2 Dopaquinone_N[c]
RN_nm3_c	Neuromelanin Synthesis	Neuron	Dopaquinone_N[c] + Cysteine_N[c] -> Cysteinyldopa_N[c]
RN_nm4_c	Neuromelanin Synthesis	Neuron	Cysteinyldopa_N[c] -> Phaeomelanin_N[c]
RN_nm5_c	Neuromelanin Synthesis	Neuron	Dopaquinone_N[c] -> Leucodopachrome_N[c]
RN_nm6_c	Neuromelanin Synthesis	Neuron	Dopaquinone_N[c] + Leucodopachrome_N[c] -> L-Dopachrome_N[c] + L-DOPA_N[c]
RN_nm7_c	Neuromelanin Synthesis	Neuron	L-Dopachrome_N[c] -> 5,6-Dihydroxyindole_N[c] + CO2_N[c]
RN_nm8_c	Neuromelanin Synthesis	Neuron	2 5,6-Dihydroxyindole_N[c] + O2_N[c] -> 2 Indole-5,6-quinone_N[c]
RN_nm9_c	Neuromelanin Synthesis	Neuron	Indole-5,6-quinone_N[c] + O2_N[c] -> Eumelanin_N[c]
RN_nm10_c	Neuromelanin Synthesis	Neuron	L-Dopachrome_N[c] -> 5,6-Dihydroxyindole-2-carboxylate_N[c]	Dct	EC-5.3.3.12
RN_nm11_c	Neuromelanin Synthesis	Neuron	2 5,6-Dihydroxyindole-2-carboxylate_N[c] + O2_N[c] -> 2 5,6-Indolequinone-2-carboxylic-acid_N[c]
RN_nm12_c	Neuromelanin Synthesis	Neuron	5,6-Indolequinone-2-carboxylic-acid_N[c] -> Eumelanin_N[c]
RN_nm13_c	Neuromelanin Synthesis	Neuron	10 Eumelanin_N[c] + 1 Phaeomelanin_N[c] -> Neuromelanin_N[c]
RA_tryp1_c	Tryptophan Metabolism	Astrocyte	Tryptophan_A[c] + Tetrahydrobiopterin_A[c] + O2_A[c] -> 5-hydroxytryptophan_A[c] + 4-alpha-hydroxy-tetrahydrobiopterin_A[c]	Tph1 | Tph2	EC-1.14.16.4
RA_tryp2_c	Tryptophan Metabolism	Astrocyte	5-hydroxytryptophan_A[c] -> Seratonin_A[c] + CO2_A[c]	Ddc	EC-4.1.1.28
RA_tryp3_c	Tryptophan Metabolism	Astrocyte	Seratonin_A[c] + Acetyl-CoA_A[c] -> N-acetyl-serotonin_A[c] + CoenzymeA_A[c]	Aanat	EC-2.3.1.87
RA_tryp4_c	Tryptophan Metabolism	Astrocyte	N-acetyl-serotonin_A[c] + S-adenosyl-L-methionine_A[c] -> S-adenosyl-L-homocysteine_A[c] + Melatonin_A[c]	Asmt	EC-2.1.1.4
RN_tryp1_c	Tryptophan Metabolism	Neuron	Tryptophan_N[c] + Tetrahydrobiopterin_N[c] + O2_N[c] -> 5-hydroxytryptophan_N[c] + 4-alpha-hydroxy-tetrahydrobiopterin_N[c]	Tph1 | Tph2	EC-1.14.16.4
RN_tryp2_c	Tryptophan Metabolism	Neuron	5-hydroxytryptophan_N[c] -> Seratonin_N[c] + CO2_N[c]	Ddc	EC-4.1.1.28
RN_tryp3_c	Tryptophan Metabolism	Neuron	Seratonin_N[c] + Acetyl-CoA_N[c] -> N-acetyl-serotonin_N[c] + CoenzymeA_N[c]	Aanat	EC-2.3.1.87
RN_tryp4_c	Tryptophan Metabolism	Neuron	N-acetyl-serotonin_N[c] + S-adenosyl-L-methionine_N[c] -> S-adenosyl-L-homocysteine_N[c] + Melatonin_N[c]	Asmt	EC-2.1.1.4
RN_acho1_c	Acetylcholine Metabolism	Neuron	Choline_N[c] + Acetyl-CoA_N[c] <-> Acetylcholine_N[c] + CoenzymeA_N[c]	Chat	EC-2.3.1.6
RA_pro1_m	Proline metabolism	Astrocyte	Ornithine_A[m] + alpha-ketoglutarate_A[m] <-> Glutamate_A[m] + Glutamate_semialdehyde_A[m]	Oat	EC-2.6.1.13
RA_pro2_m	Proline metabolism	Astrocyte	Glutamate_semialdehyde_A[m] <-> S-1-pyrroline-5-carboxylate_A[m]
RA_pro3_c	Proline metabolism	Astrocyte	S-1-pyrroline-5-carboxylate_A[c] + NADPH_A[c] -> proline_A[c] + NADP_A[c]	Pycrl	EC-1.5.1.2
RA_pro4_m	Proline metabolism	Astrocyte	S-1-pyrroline-5-carboxylate_A[m] + NADPH_A[m] -> proline_A[m] + NADP_A[m]	Pycr1 | Pycr2	EC-1.5.1.2
RA_pro5_m	Proline metabolism	Astrocyte	proline_A[m] + FAD_A[m] -> S-1-pyrroline-5-carboxylate_A[m] + FADH2_A[m]	Prodh | Prodh2	EC-1.5.99.8
RA_pro6_m	Proline metabolism	Astrocyte	S-1-pyrroline-5-carboxylate_A[m] + NAD_A[m] -> Glutamate_A[m] + NADH_A[m]	Aldh4a1	EC-1.5.1.12
RN_pro1_m	Proline metabolism	Neuron	Ornithine_N[m] + alpha-ketoglutarate_N[m] <-> Glutamate_N[m] + Glutamate_semialdehyde_N[m]	Oat	EC-2.6.1.13
RN_pro2_m	Proline metabolism	Neuron	Glutamate_semialdehyde_N[m] <-> S-1-pyrroline-5-carboxylate_N[m]
RN_pro3_c	Proline metabolism	Neuron	S-1-pyrroline-5-carboxylate_N[c] + NADPH_N[c] -> proline_N[c] + NADP_N[c]	Pycrl	EC-1.5.1.2
RN_pro4_m	Proline metabolism	Neuron	S-1-pyrroline-5-carboxylate_N[m] + NADPH_N[m] -> proline_N[m] + NADP_N[m]	Pycr1 | Pycr2	EC-1.5.1.2
RN_pro5_m	Proline metabolism	Neuron	proline_N[m] + FAD_N[m] -> S-1-pyrroline-5-carboxylate_N[m] + FADH2_N[m]	Prodh | Prodh2	EC-1.5.99.8
RN_pro6_m	Proline metabolism	Neuron	S-1-pyrroline-5-carboxylate_N[m] + NAD_N[m] -> Glutamate_N[m] + NADH_N[m]	Aldh4a1	EC-1.5.1.12
RA_meth1_c	Methionine Metabolism	Astrocyte	ATP_A[c] + methionine_A[c] -> S-adenosyl-L-methionine_A[c] + phosphate_A[c] + diphosphate_A[c]	Mat1a | Mat2a | Mat2b	EC-2.5.1.6
RA_meth2_c	Methionine Metabolism	Astrocyte	S-adenosyl-L-methionine_A[c] -> S-adenosyl-L-homocysteine_A[c]		EC-2.1.1
RA_meth3_c	Methionine Metabolism	Astrocyte	S-adenosyl-L-homocysteine_A[c] -> L-homocysteine_A[c] + adenosine_A[c]	Ahcy | Ahcyl1 | Ahcyl2	EC-3.3.1.1
RA_meth4_c	Methionine Metabolism	Astrocyte	L-homocysteine_A[c] -> methionine_A[c] + tetrahydrofolate_A[c]	Mtr	EC-2.1.1.13
RA_meth5_c	Methionine Metabolism	Astrocyte	L-homocysteine_A[c] + Serine_A[c] -> L-cystathionine_A[c]	Cbs	EC-4.2.1.22
RA_meth6_c	Methionine Metabolism	Astrocyte	L-cystathionine_A[c] -> NH4_A[c] + 2-oxobutanoate_A[c] + Cysteine_A[c]	Cth	EC-4.4.1.1
RN_meth1_c	Methionine Metabolism	Neuron	ATP_N[c] + methionine_N[c] -> S-adenosyl-L-methionine_N[c] + phosphate_N[c] + diphosphate_N[c]	Mat1a | Mat2a | Mat2b	EC-2.5.1.6
RN_meth2_c	Methionine Metabolism	Neuron	S-adenosyl-L-methionine_N[c] -> S-adenosyl-L-homocysteine_N[c]		EC-2.1.1
RN_meth3_c	Methionine Metabolism	Neuron	S-adenosyl-L-homocysteine_N[c] -> L-homocysteine_N[c] + adenosine_N[c]	Ahcy | Ahcyl1 | Ahcyl2	EC-3.3.1.1
RN_meth4_c	Methionine Metabolism	Neuron	L-homocysteine_N[c] -> methionine_N[c] + tetrahydrofolate_N[c]	Mtr	EC-2.1.1.13
RN_meth5_c	Methionine Metabolism	Neuron	L-homocysteine_N[c] + Serine_N[c] -> L-cystathionine_N[c]	Cbs	EC-4.2.1.22
RN_meth6_c	Methionine Metabolism	Neuron	L-cystathionine_N[c] -> NH4_N[c] + 2-oxobutanoate_N[c] + Cysteine_N[c]	Cth	EC-4.4.1.1
RA_thr1_m	Threonine Metabolism	Astrocyte	threonine_A[m] + NAD_A[m] -> 2-amino-3-oxobutanoate_A[m] + NADH_A[m]	Tdh	EC-1.1.1.103
RA_thr2_m	Threonine Metabolism	Astrocyte	2-amino-3-oxobutanoate_A[m] -> Glycine_A[m] + Acetyl-CoA_A[m]	Gcat	EC-2.3.1.29
RN_thr1_m	Threonine Metabolism	Neuron	threonine_N[m] + NAD_N[m] -> 2-amino-3-oxobutanoate_N[m] + NADH_N[m]	Tdh	EC-1.1.1.103
RN_thr2_m	Threonine Metabolism	Neuron	2-amino-3-oxobutanoate_N[m] -> Glycine_N[c] + Acetyl-CoA_N[m]	Gcat	EC-2.3.1.29
RA_tau1_c	Taurine Synthesis	Astrocyte	Cysteine_A[c] + O2_A[c] -> Cysteinesulfinic_acid_A[c]	Cdo1	EC-1.13.11.20
RA_tau2_c	Taurine Synthesis	Astrocyte	Cysteinesulfinic_acid_A[c] -> Hypotaurine_A[c] + CO2_A[c]	Csad	EC-4.1.1.29
RA_tau3_c	Taurine Synthesis	Astrocyte	Cysteine_A[c] + CoenzymeA_A[c] -> Cyteamine_A[c]
RA_tau4_c	Taurine Synthesis	Astrocyte	Cyteamine_A[c] + O2_A[c] -> Hypotaurine_A[c]	Ado	EC-1.13.11.19
RA_tau5_c	Taurine Synthesis	Astrocyte	Hypotaurine_A[c] + NAD_A[c] -> Taurine_A[c] + NADH_A[c]
RAN_t16_c	Taurine Synthesis	Intercellular	Hypotaurine_A[c] <-> Hypotaurine_N[c]
RN_tau1_c	Taurine Synthesis	Neuron	Cysteine_N[c] + O2_N[c] -> Cysteinesulfinic_acid_N[c]	Cdo1	EC-1.13.11.20
RN_tau2_c	Taurine Synthesis	Neuron	Cysteinesulfinic_acid_N[c] -> Hypotaurine_N[c] + CO2_N[c]	Csad	EC-4.1.1.29
RN_tau3_c	Taurine Synthesis	Neuron	Cysteine_N[c] + CoenzymeA_N[c] -> Cyteamine_N[c]
RN_tau4_c	Taurine Synthesis	Neuron	Cyteamine_N[c] + O2_N[c] -> Hypotaurine_N[c]	Ado	EC-1.13.11.19
RN_tau5_c	Taurine Synthesis	Neuron	Hypotaurine_N[c] + NAD_N[c] -> Taurine_N[c] + NADH_N[c]
RA_arg1_m	Arginine Metabolism	Astrocyte	Arginine_A[m] <-> Agmatine_A[m] + CO2_A[m]		EC-4.1.1.19
RA_arg2_c	Arginine Metabolism	Astrocyte	Arginine_A[c] <-> Agmatine_A[c] + CO2_A[c]		EC-4.1.1.19
RA_arg3_c	Arginine Metabolism	Astrocyte	Arginine_A[c] -> Ornithine_A[c] + Urea_A[c]	Arg1	EC-3.5.3.1
RA_arg4_m	Arginine Metabolism	Astrocyte	Arginine_A[m] -> Ornithine_A[m] + Urea_A[m]	Arg2	EC-3.5.3.1
RAN_t17_c	Arginine Metabolism	Intercellular	Arginine_A[c] -> Arginine_N[c]	Slc6a14 | Slc7a9 | Slc7a7 | Slc38a7 | Slc38a8
RN_arg1_c	Arginine Metabolism	Neuron	2 Arginine_N[c] + 3 NADPH_N[c] + 4 O2_N[c] <-> 2 Citrulline_N[c] + 3 NADP_N[c]	Nos1 | Nos1ap | Nos2 | Nos3 | Nosip	EC-1.14.13.39
RN_arg2_c	Arginine Metabolism	Neuron	Aspartate_N[c] + Citrulline_N[c] + ATP_N[c] -> L_Arginino_Succinate_N[c] + AMP_N[c] + diphosphate_N[c]	Ass1	EC-6.3.4.5
RN_arg3_c	Arginine Metabolism	Neuron	L_Arginino_Succinate_N[c] -> Arginine_N[c] + Fumarate_N[c]	Asl	EC-4.3.2.1
RN_arg4_m	Arginine Metabolism	Neuron	Arginine_N[m] <-> Agmatine_N[m] + CO2_N[m]		EC-4.1.1.19
RN_arg5_c	Arginine Metabolism	Neuron	Arginine_N[c] <-> Agmatine_N[c] + CO2_N[c]		EC-4.1.1.19
RN_arg6_m	Arginine Metabolism	Neuron	Agmatine_N[m] <-> Putrescine_N[m] + Urea_N[m]	Agmat	EC-3.5.3.11
RN_arg7_c	Arginine Metabolism	Neuron	Arginine_N[c] -> Ornithine_N[c] + Urea_N[c]	Arg1	EC-3.5.3.1
RN_arg8_m	Arginine Metabolism	Neuron	Arginine_N[m] -> Ornithine_N[m] + Urea_N[m]	Arg2	EC-3.5.3.1
RN_arg9_c	Arginine Metabolism	Neuron	Ornithine_N[c] <-> CO2_N[c] + Putrescine_N[c]	D12Nds11 | Adc | Azin1 | Oaz1 | Oaz2 | Oaz3 | Odc1	EC-4.1.1.17
RAN_t18_c	Arginine Metabolism	Intercellular	Putrescine_N[c] -> Putrescine_A[c]
RA_pa1_c	Polyamine Metabolism	Astrocyte	Putrescine_A[c] + Acetyl-CoA_A[c] -> N-acetylputrescine_A[c] + CoenzymeA_A[c]	Sat1 | Sat2 | Satl1	EC-2.3.1.57
RA_pa2_c	Polyamine Metabolism	Astrocyte	N-acetylputrescine_A[c] + O2_A[c] -> Acetamidobutanal_A[c] + NH4_A[c] + H2O2_A[c]	Maoa	EC-1.4.3.4
RA_pa3_m	Polyamine Metabolism	Astrocyte	N-acetylputrescine_A[m] + O2_A[m] -> Acetamidobutanal_A[m] + NH4_A[m] + H2O2_A[m]	Maoa | Maob	EC-1.4.3.4
RA_pa4_c	Polyamine Metabolism	Astrocyte	Acetamidobutanal_A[c] + NAD_A[c] -> Acetamidobutanoate_A[c] + NADH_A[c]	Aldh1a7 | Aldh7a1 | Aldh3a2 | Aldh9a1	EC-1.2.1.3
RA_pa5_m	Polyamine Metabolism	Astrocyte	Acetamidobutanal_A[m] + NAD_A[m] -> Acetamidobutanoate_A[m] + NADH_A[m]	Aldh1a7 | Aldh7a1 | Aldh3a2 | Aldh2 | Aldh9a1	EC-1.2.1.3
RA_pa6_c	Polyamine Metabolism	Astrocyte	Acetamidobutanoate_A[c] -> GABA_A[c]		EC-3.5.1-
RA_pa7_c	Polyamine Metabolism	Astrocyte	S-adenosyl-L-methionine_A[c] -> S-adenosyl-L-methioninamine_A[c] + CO2_A[c]	Amd1 | Amd2	EC-4.1.1.50
RN_pa1_c	Polyamine Metabolism	Neuron	S-adenosyl-L-methionine_N[c] -> S-adenosyl-L-methioninamine_N[c] + CO2_N[c]	Amd1 | Amd2	EC-4.1.1.50
RN_pa2_c	Polyamine Metabolism	Neuron	Putrescine_N[c] + S-adenosyl-L-methioninamine_N[c] -> Spermidine_N[c] + S-methyl-5-thioadenosine_N[c]	Srm	EC-2.5.1.16
RN_pa3_c	Polyamine Metabolism	Neuron	Spermidine_N[c] + S-adenosyl-L-methioninamine_N[c] -> Spermine_N[c] + S-methyl-5-thioadenosine_N[c]	Sms	EC-2.5.1.22
RN_pa4_c	Polyamine Metabolism	Neuron	Spermine_N[c] + Acetyl-CoA_N[c] -> N_1_Acetylspermine_N[c] + CoenzymeA_N[c]	Sat1 | Sat2 | Satl1	EC-2.3.1.57
RN_pa5_c	Polyamine Metabolism	Neuron	N_1_Acetylspermine_N[c] + O2_N[c] -> H2O2_N[c] + Spermidine_N[c] + 3-acetamidopropanal_N[c]	Paox	EC-1.5.3.13
RN_pa6_c	Polyamine Metabolism	Neuron	Spermine_N[c] + O2_N[c] -> H2O2_N[c] + Spermidine_N[c]	Paox	EC-1.5.3.16
RN_pa7_c	Polyamine Metabolism	Neuron	Spermidine_N[c] + Acetyl-CoA_N[c] -> N_1_Acetylspermidine_N[c] + CoenzymeA_N[c]	Sat1 | Sat2 | Satl1	EC-2.3.1.57
RN_pa8_c	Polyamine Metabolism	Neuron	N_1_Acetylspermidine_N[c] + O2_N[c] -> H2O2_N[c] + Putrescine_N[c] + 3-acetamidopropanal_N[c]	Paox	EC-1.5.3.13
RA_chol1_c	Cholesterol Synthesis	Astrocyte	Acetyl-CoA_A[c] + Acetoacetyl-CoA_A[c] -> s3_hydroxy_3_methylglutaryl-Coa_A[c] + CoenzymeA_A[c]	Hmgcs1	EC-2.3.3.10
RA_chol2_m	Cholesterol Synthesis	Astrocyte	Acetyl-CoA_A[m] + Acetoacetyl-CoA_A[m] -> s3_hydroxy_3_methylglutaryl-Coa_A[m] + CoenzymeA_A[m]	Hmgcs2	EC-2.3.3.10
RA_chol3_c	Cholesterol Synthesis	Astrocyte	s3_hydroxy_3_methylglutaryl-Coa_A[c] + 2 NADPH_A[c] -> R-mevalonate_A[c] + 2 NADP_A[c] + CoenzymeA_A[c]	Hmgcs1 | Hmgcr	EC-1.1.1.34
RA_chol4_c	Cholesterol Synthesis	Astrocyte	R-mevalonate_A[c] + ATP_A[c] -> mevalonate-5-phosphate_A[c] + ADP_A[c]	Mvk	EC-2.7.1.36
RA_chol5_c	Cholesterol Synthesis	Astrocyte	mevalonate-5-phosphate_A[c] + ATP_A[c] <-> mevalonate-diphosphate_A[c] + ADP_A[c]	Pmvk	EC-2.7.4.2
RA_chol6_c	Cholesterol Synthesis	Astrocyte	mevalonate-diphosphate_A[c] + ATP_A[c] -> isopentenyl_diphosphate_A[c] + CO2_A[c] + ADP_A[c] + phosphate_A[c]	Mvd	EC-4.1.1.33
RA_chol7_c	Cholesterol Synthesis	Astrocyte	isopentenyl_diphosphate_A[c] -> dimethylallyl_diphosphate_A[c]	Idi1 | Idi2 | Nudt12	EC-5.3.3.2
RA_chol8_c	Cholesterol Synthesis	Astrocyte	dimethylallyl_diphosphate_A[c] + isopentenyl_diphosphate_A[c] -> geranyl_diphosphate_A[c] + diphosphate_A[c]	Ggps1 | Fdps	EC-2.5.1.1
RA_chol9_c	Cholesterol Synthesis	Astrocyte	isopentenyl_diphosphate_A[c] + geranyl_diphosphate_A[c] -> 2E_6E_farnesyl_diphosphate_A[c] + diphosphate_A[c]	Ggps1 | Fdps	EC-2.5.1.10
RA_chol10_c	Cholesterol Synthesis	Astrocyte	2 2E_6E_farnesyl_diphosphate_A[c] -> presqualene_diphosphate_A[c] + diphosphate_A[c]	Fdft1	EC-2.5.1.21
RA_chol11_c	Cholesterol Synthesis	Astrocyte	presqualene_diphosphate_A[c] + NADPH_A[c] -> squalene_A[c] + NADP_A[c] + diphosphate_A[c]	Fdft1	EC-2.5.1.21
RA_chol12_c	Cholesterol Synthesis	Astrocyte	squalene_A[c] + NADPH_A[c] + O2_A[c] -> S_2_3_epoxysqualene_A[c] + NADP_A[c]	Sqle	EC-1.14.99.7
RA_chol13_c	Cholesterol Synthesis	Astrocyte	S_2_3_epoxysqualene_A[c] -> lanosterol_A[c]	Lss	EC-5.4.99.7
RA_chol14_c	Cholesterol Synthesis (Bloch pathway)	Astrocyte	lanosterol_A[c] + NADPH_A[c] + O2_A[c] -> 4-4-dimethyl-14alpha-hydroxymethyl-5alpha-cholesta-8-24-dien-3beta-ol_A[c] + NADP_A[c]	Cyp51	EC-1.14.13.70
RA_chol15_c	Cholesterol Synthesis (Bloch pathway)	Astrocyte	4-4-dimethyl-14alpha-hydroxymethyl-5alpha-cholesta-8-24-dien-3beta-ol_A[c] + NADPH_A[c] + O2_A[c] -> 4-4-dimethyl-14alpha-formyl-5alpha-cholesta-8-24-dien-3beta-ol_A[c] + NADP_A[c]	Cyp51	EC-1.14.13.70
RA_chol16_c	Cholesterol Synthesis (Bloch pathway)	Astrocyte	4-4-dimethyl-14alpha-formyl-5alpha-cholesta-8-24-dien-3beta-ol_A[c] + NADPH_A[c] + O2_A[c] -> 4-4-dimethyl-5-alpha-cholesta-8-14-24-trien-3-beta-ol_A[c] + NADP_A[c] + formate_A[c]	Cyp51	EC-1.14.13.70
RA_chol17_c	Cholesterol Synthesis (Bloch pathway)	Astrocyte	4-4-dimethyl-5-alpha-cholesta-8-14-24-trien-3-beta-ol_A[c] + NADPH_A[c] -> 4_4-dimethylzymosterol_A[c] + NADP_A[c]	Tm7sf2	EC-1.3.1.70
RA_chol18_c	Cholesterol Synthesis (Bloch pathway)	Astrocyte	4_4-dimethylzymosterol_A[c] + NADPH_A[c] + O2_A[c] -> 4alpha-hydroxymethyl-4beta-methyl-5alpha-cholesta-8-24-dien-3beta-ol_A[c] + NADP_A[c]	Msmo1	EC-1.14.13.72
RA_chol19_c	Cholesterol Synthesis (Bloch pathway)	Astrocyte	4alpha-hydroxymethyl-4beta-methyl-5alpha-cholesta-8-24-dien-3beta-ol_A[c] + NADPH_A[c] + O2_A[c] -> 4alpha-formyl-4beta-methyl-5alpha-cholesta-8-24-dien-3beta-ol_A[c] + NADP_A[c]	Msmo1	EC-1.14.13.72
RA_chol20_c	Cholesterol Synthesis (Bloch pathway)	Astrocyte	4alpha-formyl-4beta-methyl-5alpha-cholesta-8-24-dien-3beta-ol_A[c] + NADPH_A[c] + O2_A[c] -> 4alpha-carboxy-4beta-methyl-5alpha-cholesta-8-24-dien-3beta-ol_A[c] + NADP_A[c]	Msmo1	EC-1.14.13.72
RA_chol21_c	Cholesterol Synthesis (Bloch pathway)	Astrocyte	4alpha-carboxy-4beta-methyl-5alpha-cholesta-8-24-dien-3beta-ol_A[c] + NADP_A[c] -> 3-keto-4-methylzymosterol_A[c] + NADPH_A[c] + CO2_A[c]	Nsdhl	EC-1.1.1.170
RA_chol22_c	Cholesterol Synthesis (Bloch pathway)	Astrocyte	3-keto-4-methylzymosterol_A[c] + NADPH_A[c] -> 4alpha-methyl-zymosterol_A[c] + NADP_A[c]	Hsd17b7	EC-1.1.1.270
RA_chol23_c	Cholesterol Synthesis (Bloch pathway)	Astrocyte	4alpha-methyl-zymosterol_A[c] + NADPH_A[c] + O2_A[c] -> 4alpha-hydroxymethyl-5alpha-cholesta-8-24-dien-3beta-ol_A[c] + NADP_A[c]	Msmo1	EC-1.14.13.72
RA_chol24_c	Cholesterol Synthesis (Bloch pathway)	Astrocyte	4alpha-hydroxymethyl-5alpha-cholesta-8-24-dien-3beta-ol_A[c] + NADPH_A[c] + O2_A[c] -> 4alpha-formyl-5alpha-cholesta-8-24-dien-3beta-ol_A[c] + NADP_A[c]	Msmo1	EC-1.14.13.72
RA_chol25_c	Cholesterol Synthesis (Bloch pathway)	Astrocyte	4alpha-formyl-5alpha-cholesta-8-24-dien-3beta-ol_A[c] + NADPH_A[c] + O2_A[c] -> 4alpha-carboxy-5alpha-cholesta-8-24-dien-3beta-ol_A[c] + NADP_A[c]	Msmo1	EC-1.14.13.72
RA_chol26_c	Cholesterol Synthesis (Bloch pathway)	Astrocyte	4alpha-carboxy-5alpha-cholesta-8-24-dien-3beta-ol_A[c] + NADP_A[c] -> 5alpha-cholesta-8-24-dien-3-one_A[c] + NADPH_A[c] + CO2_A[c]	Nsdhl	EC-1.1.1.170
RA_chol27_c	Cholesterol Synthesis (Bloch pathway)	Astrocyte	5alpha-cholesta-8-24-dien-3-one_A[c] + NADPH_A[c] -> zymosterol_A[c] + NADP_A[c]	Hsd17b7	EC-1.1.1.270
RA_chol28_c	Cholesterol Synthesis (Bloch pathway)	Astrocyte	zymosterol_A[c] -> 5alpha-cholesta-7-24-dien-3beta-ol_A[c]	Ebp	EC-5.3.3.5
RA_chol29_c	Cholesterol Synthesis (Bloch pathway)	Astrocyte	5alpha-cholesta-7-24-dien-3beta-ol_A[c] + NADPH_A[c] + O2_A[c] -> 7-dehydrodesmosterol_A[c] + NADP_A[c]	Sc5d	EC-1.14.21.6
RA_chol30_c	Cholesterol Synthesis (Bloch pathway)	Astrocyte	7-dehydrodesmosterol_A[c] + NADPH_A[c] -> desmosterol_A[c] + NADP_A[c]	Dhcr7	EC-1.3.1.21
RA_chol31_c	Cholesterol Synthesis (Bloch pathway)	Astrocyte	desmosterol_A[c] + NADPH_A[c] -> Cholesterol_A[c] + NADP_A[c]	Dhcr24	EC-1.3.1.72
RAN_t19_c	Cholesterol Synthesis	Intercellular	Cholesterol_A[c] -> Cholesterol_N[c]
RN_chol1_c	Cholesterol Synthesis	Neuron	Acetyl-CoA_N[c] + Acetoacetyl-CoA_N[c] -> s3_hydroxy_3_methylglutaryl-Coa_N[c] + CoenzymeA_N[c]	Hmgcs1	EC-2.3.3.10
RN_chol2_m	Cholesterol Synthesis	Neuron	Acetyl-CoA_N[m] + Acetoacetyl-CoA_N[m] -> s3_hydroxy_3_methylglutaryl-Coa_N[m] + CoenzymeA_N[m]	Hmgcs2	EC-2.3.3.10
RN_chol3_c	Cholesterol Synthesis	Neuron	s3_hydroxy_3_methylglutaryl-Coa_N[c] + 2 NADPH_N[c] -> R-mevalonate_N[c] + 2 NADP_N[c] + CoenzymeA_N[c]	Hmgcs1 | Hmgcr	EC-1.1.1.34
RN_chol4_c	Cholesterol Synthesis	Neuron	R-mevalonate_N[c] + ATP_N[c] -> mevalonate-5-phosphate_N[c] + ADP_N[c]	Mvk	EC-2.7.1.36
RN_chol5_c	Cholesterol Synthesis	Neuron	mevalonate-5-phosphate_N[c] + ATP_N[c] <-> mevalonate-diphosphate_N[c] + ADP_N[c]	Pmvk	EC-2.7.4.2
RN_chol6_c	Cholesterol Synthesis	Neuron	mevalonate-diphosphate_N[c] + ATP_N[c] -> isopentenyl_diphosphate_N[c] + CO2_N[c] + ADP_N[c] + phosphate_N[c]	Mvd	EC-4.1.1.33
RN_chol7_c	Cholesterol Synthesis	Neuron	isopentenyl_diphosphate_N[c] -> dimethylallyl_diphosphate_N[c]	Idi1 | Idi2 | Nudt12	EC-5.3.3.2
RN_chol8_c	Cholesterol Synthesis	Neuron	dimethylallyl_diphosphate_N[c] + isopentenyl_diphosphate_N[c] -> geranyl_diphosphate_N[c] + diphosphate_N[c]	Ggps1 | Fdps	EC-2.5.1.1
RN_chol9_c	Cholesterol Synthesis	Neuron	isopentenyl_diphosphate_N[c] + geranyl_diphosphate_N[c] -> 2E_6E_farnesyl_diphosphate_N[c] + diphosphate_N[c]	Ggps1 | Fdps	EC-2.5.1.10
RN_chol10_c	Cholesterol Synthesis	Neuron	2 2E_6E_farnesyl_diphosphate_N[c] -> presqualene_diphosphate_N[c] + diphosphate_N[c]	Fdft1	EC-2.5.1.21
RN_chol11_c	Cholesterol Synthesis	Neuron	presqualene_diphosphate_N[c] + NADPH_N[c] -> squalene_N[c] + NADP_N[c] + diphosphate_N[c]	Fdft1	EC-2.5.1.21
RN_chol12_c	Cholesterol Synthesis	Neuron	squalene_N[c] + NADPH_N[c] + O2_N[c] -> S_2_3_epoxysqualene_N[c] + NADP_N[c]	Sqle	EC-1.14.99.7
RN_chol13_c	Cholesterol Synthesis	Neuron	S_2_3_epoxysqualene_N[c] -> lanosterol_N[c]	Lss	EC-5.4.99.7
RN_chol14_c	Cholesterol Synthesis (Kandustch-Russell pathway)	Neuron	lanosterol_N[c] + NADPH_N[c] -> 24-25-dihydrolanosterol_N[c] + NADP_N[c]	Dhcr24	EC-1.3.1.72
RN_chol15_c	Cholesterol Synthesis (Kandustch-Russell pathway)	Neuron	24-25-dihydrolanosterol_N[c] + NADPH_N[c] + O2_N[c] -> 4-4-dimethyl-14alpha-hydroxymethyl-5alpha-cholesta-8-en-3beta-ol_N[c] + NADP_N[c]	Cyp51	EC-1.14.13.70
RN_chol16_c	Cholesterol Synthesis (Kandustch-Russell pathway)	Neuron	4-4-dimethyl-14alpha-hydroxymethyl-5alpha-cholesta-8-en-3beta-ol_N[c] + NADPH_N[c] + O2_N[c] -> 4-4-dimethyl-14alpha-formyl-5alpha-cholesta-8-en-3beta-ol_N[c] + NADP_N[c]	Cyp51	EC-1.14.13.70
RN_chol17_c	Cholesterol Synthesis (Kandustch-Russell pathway)	Neuron	4-4-dimethyl-14alpha-formyl-5alpha-cholesta-8-en-3beta-ol_N[c] + NADPH_N[c] + O2_N[c] -> 4-4-dimethyl-5-alpha-cholesta-8-14-dien-3-beta-ol_N[c] + NADP_N[c] + formate_N[c]	Cyp51	EC-1.14.13.70
RN_chol18_c	Cholesterol Synthesis (Kandustch-Russell pathway)	Neuron	4-4-dimethyl-5-alpha-cholesta-8-14-dien-3-beta-ol_N[c] + NADPH_N[c] -> 4-4-dimethyl-5alpha-cholesta-8-en-3-beta-ol_N[c] + NADP_N[c]	Cyp51	EC-1.14.13.70
RN_chol19_c	Cholesterol Synthesis (Kandustch-Russell pathway)	Neuron	4-4-dimethyl-5alpha-cholesta-8-en-3-beta-ol_N[c] + NADPH_N[c] + O2_N[c] -> 4alpha-hydroxymethyl-4beta-methyl-5alpha-cholesta-8-en-3beta-ol_N[c] + NADP_N[c]	Msmo1	EC-1.14.13.72
RN_chol20_c	Cholesterol Synthesis (Kandustch-Russell pathway)	Neuron	4alpha-hydroxymethyl-4beta-methyl-5alpha-cholesta-8-en-3beta-ol_N[c] + NADPH_N[c] + O2_N[c] -> 4alpha-formyl-4beta-methyl-5alpha-cholesta-8-en-3beta-ol_N[c] + NADP_N[c]	Msmo1	EC-1.14.13.72
RN_chol21_c	Cholesterol Synthesis (Kandustch-Russell pathway)	Neuron	4alpha-formyl-4beta-methyl-5alpha-cholesta-8-en-3beta-ol_N[c] + NADPH_N[c] + O2_N[c] -> 4alpha-carboxy-4beta-methyl-5alpha-cholesta-8-en-3beta-ol_N[c] + NADP_N[c]	Msmo1	EC-1.14.13.72
RN_chol22_c	Cholesterol Synthesis (Kandustch-Russell pathway)	Neuron	4alpha-carboxy-4beta-methyl-5alpha-cholesta-8-en-3beta-ol_N[c] + NADP_N[c] -> 4alpha-methyl-5alpha-cholesta-8-en-3-one_N[c] + NADPH_N[c] + CO2_N[c]	Nsdhl	EC-1.1.1.170
RN_chol23_c	Cholesterol Synthesis (Kandustch-Russell pathway)	Neuron	4alpha-methyl-5alpha-cholesta-8-en-3-one_N[c] + NADPH_N[c] -> 4alpha-methyl-cholesta-8-enol_N[c] + NADP_N[c]	Hsd17b7	EC-1.1.1.270
RN_chol24_c	Cholesterol Synthesis (Kandustch-Russell pathway)	Neuron	4alpha-methyl-cholesta-8-enol_N[c] + NADPH_N[c] + O2_N[c] -> 4alpha-hydroxymethyl-5alpha-cholesta-8-en-3beta-ol_N[c] + NADP_N[c]	Msmo1	EC-1.14.13.72
RN_chol25_c	Cholesterol Synthesis (Kandustch-Russell pathway)	Neuron	4alpha-hydroxymethyl-5alpha-cholesta-8-en-3beta-ol_N[c] + NADPH_N[c] + O2_N[c] -> 4alpha-formyl-5alpha-cholesta-8-en-3beta-ol_N[c] + NADP_N[c]	Msmo1	EC-1.14.13.72
RN_chol26_c	Cholesterol Synthesis (Kandustch-Russell pathway)	Neuron	4alpha-formyl-5alpha-cholesta-8-en-3beta-ol_N[c] + NADPH_N[c] + O2_N[c] -> 4alpha-carboxy-5alpha-cholesta-8-en-3beta-ol_N[c] + NADP_N[c]	Msmo1	EC-1.14.13.72
RN_chol27_c	Cholesterol Synthesis (Kandustch-Russell pathway)	Neuron	4alpha-carboxy-5alpha-cholesta-8-en-3beta-ol_N[c] + NADP_N[c] -> 5alpha-cholesta-8-en-3-one_N[c] + CO2_N[c] + NADPH_N[c]	Nsdhl	EC-1.1.1.170
RN_chol28_c	Cholesterol Synthesis (Kandustch-Russell pathway)	Neuron	5alpha-cholesta-8-en-3-one_N[c] + NADPH_N[c] -> zymostenol_N[c] + NADP_N[c]	Hsd17b7	EC-1.1.1.270
RN_chol29_c	Cholesterol Synthesis (Kandustch-Russell pathway)	Neuron	zymostenol_N[c] -> lathosterol_N[c]	Ebp	EC-5.3.3.5
RN_chol30_c	Cholesterol Synthesis (Kandustch-Russell pathway)	Neuron	5alpha-cholesta-7-24-dien-3beta-ol_N[c] + NADPH_N[c] -> lathosterol_N[c] + NADP_N[c]	Dhcr24	EC-1.3.1.72
RN_chol31_c	Cholesterol Synthesis (Kandustch-Russell pathway)	Neuron	lathosterol_N[c] + NADPH_N[c] + O2_N[c] -> 7-dehydro-cholesterol_N[c] + NADP_N[c]	Sc5d	EC-1.14.21.6
RN_chol32_c	Cholesterol Synthesis (Kandustch-Russell pathway)	Neuron	7-dehydro-cholesterol_N[c] + NADPH_N[c] -> Cholesterol_N[c] + NADP_N[c]	Dhcr7	EC-1.3.1.21
RN_chol33_c	Cholesterol Synthesis (Kandustch-Russell pathway)	Neuron	NADPH_N[c] + O2_N[c] + Cholesterol_N[c] -> 24-hydroxycholesterol_N[c] + NADP_N[c]	Cyp46a1	EC-1.14.13.98
RA_fat1_m	Fatty Acid Synthesis	Astrocyte	Acetyl-CoA_A[m] + CO2_A[m] <-> Malonyl-CoA_A[m]	Mlycd	EC-4.1.1.9
RA_fat2_c	Fatty Acid Synthesis	Astrocyte	Acetyl-CoA_A[c] + CO2_A[c] <-> Malonyl-CoA_A[c]	Mlycd	EC-4.1.1.9
RA_fat3_m	Fatty Acid Synthesis	Astrocyte	Acetyl-CoA_A[m] + ATP_A[m] + Bicarbonate_A[m] -> Malonyl-CoA_A[m] + ADP_A[m] + phosphate_A[m]	Acaca | Acacb	EC-6.4.1.2
RA_fat4_c	Fatty Acid Synthesis	Astrocyte	Acetyl-CoA_A[c] + ATP_A[c] + Bicarbonate_A[c] -> Malonyl-CoA_A[c] + ADP_A[c] + phosphate_A[c]	Acaca	EC-6.4.1.2
RA_fat5_c	Fatty Acid Synthesis	Astrocyte	Acetyl-CoA_A[c] <-> Acetyl-acp_A[c] + CoenzymeA_A[c]	Fasn	EC-2.3.1.38
RA_fat6_m	Fatty Acid Synthesis	Astrocyte	Malonyl-CoA_A[m] <-> Malonyl-acp_A[m] + CoenzymeA_A[m]	Mcat | Fasn	EC-2.3.1.39
RA_fat7_m	Fatty Acid Synthesis	Astrocyte	Malonyl-acp_A[m] + Acetyl-acp_A[m] <-> Acetoacetyl-acp_A[m] + CO2_A[m]	Oxsm	EC-2.3.1.41
RA_fat8_c	Fatty Acid Synthesis	Astrocyte	Malonyl-acp_A[c] + Acetyl-acp_A[c] <-> Acetoacetyl-acp_A[c] + CO2_A[c]	Oxsm | Fasn	EC-2.3.1.41
RA_fat9_m	Fatty Acid Synthesis	Astrocyte	Bicarbonate_A[m] <-> CO2_A[m]	Car5b | Car15 | Car14 | Car13 | Car12 | Car4	EC-4.2.1.1
RA_fat10_c	Fatty Acid Synthesis	Astrocyte	Bicarbonate_A[c] <-> CO2_A[c]	Car15 | Car14 | Car13 | Car12 | Car4	EC-4.2.1.1
RA_fat11_c	Fatty Acid Synthesis	Astrocyte	Acetoacetyl-acp_A[c] + NADPH_A[c] -> R-3-hydroxybutanoyl-acp_A[c] + NADP_A[c]	Cbr4 | Fasn	EC-1.1.1.100 | EC-2.3.1.85
RA_fat12_c	Fatty Acid Synthesis	Astrocyte	R-3-hydroxybutanoyl-acp_A[c] -> Crotonyl-acp_A[c]	Fasn	EC-4.2.1.59 | EC-2.3.1.85
RA_fat13_c	Fatty Acid Synthesis	Astrocyte	Crotonyl-acp_A[c] + NADPH_A[c] -> Butyryl-acp_A[c] + NADP_A[c]	Fasn	EC-1.3.1.39 | EC-2.3.1.85
RA_fat14_c	Fatty Acid Synthesis	Astrocyte	Butyryl-acp_A[c] + Malonyl-CoA_A[c] -> 3-oxo-hexanoyl-acp_A[c] + CO2_A[c] + CoenzymeA_A[c]	Fasn	EC-2.3.1.41 | EC-2.3.1.85
RA_fat15_c	Fatty Acid Synthesis	Astrocyte	3-oxo-hexanoyl-acp_A[c] + NADPH_A[c] -> R-3-hydroxyhexanoyl-acp_A[c] + NADP_A[c]	Cbr4 | Fasn	EC-1.1.1.100 | EC-2.3.1.85
RA_fat16_c	Fatty Acid Synthesis	Astrocyte	R-3-hydroxyhexanoyl-acp_A[c] -> trans_hex-2-enoyl-acp_A[c]	Fasn	EC-4.2.1.59 | EC-2.3.1.85
RA_fat17_c	Fatty Acid Synthesis	Astrocyte	trans_hex-2-enoyl-acp_A[c] + NADPH_A[c] -> Hexanoyl-acp_A[c] + NADP_A[c]	Fasn	EC-1.3.1.39 | EC-2.3.1.85
RA_fat18_c	Fatty Acid Synthesis	Astrocyte	Hexanoyl-acp_A[c] + Malonyl-CoA_A[c] -> 3-oxo-octanoyl-acp_A[c] + CO2_A[c] + CoenzymeA_A[c]	Fasn	EC-2.3.1.41 | EC-2.3.1.85
RA_fat19_c	Fatty Acid Synthesis	Astrocyte	3-oxo-octanoyl-acp_A[c] + NADPH_A[c] -> R-3-hydroxyoctanoyl-acp_A[c] + NADP_A[c]	Cbr4 | Fasn	EC-1.1.1.100 | EC-2.3.1.85
RA_fat20_c	Fatty Acid Synthesis	Astrocyte	R-3-hydroxyoctanoyl-acp_A[c] -> trans_oct-2-enoyl-acp_A[c]	Fasn	EC-4.2.1.59 | EC-2.3.1.85
RA_fat21_c	Fatty Acid Synthesis	Astrocyte	trans_oct-2-enoyl-acp_A[c] + NADPH_A[c] -> Octanoyl-acp_A[c] + NADP_A[c]	Fasn	EC-1.3.1.39 | EC-2.3.1.85
RA_fat22_c	Fatty Acid Synthesis	Astrocyte	Octanoyl-acp_A[c] + Malonyl-CoA_A[c] -> 3-oxo-decanoyl-acp_A[c] + CO2_A[c] + CoenzymeA_A[c]	Fasn	EC-2.3.1.41 | EC-2.3.1.85
RA_fat23_c	Fatty Acid Synthesis	Astrocyte	3-oxo-decanoyl-acp_A[c] + NADPH_A[c] -> R-3-hydroxydecanoyl-acp_A[c] + NADP_A[c]	Cbr4 | Fasn	EC-1.1.1.100 | EC-2.3.1.85
RA_fat24_c	Fatty Acid Synthesis	Astrocyte	R-3-hydroxydecanoyl-acp_A[c] -> trans-delta2-decenoyl-acp_A[c]	Fasn	EC-4.2.1.59 | EC-2.3.1.85
RA_fat25_c	Fatty Acid Synthesis	Astrocyte	trans-delta2-decenoyl-acp_A[c] + NADPH_A[c] -> Decanoyl-acp_A[c] + NADP_A[c]	Fasn	EC-1.3.1.39 | EC-2.3.1.85
RA_fat26_c	Fatty Acid Synthesis	Astrocyte	Decanoyl-acp_A[c] + Malonyl-CoA_A[c] -> 3-oxo-dodecanoyl-acp_A[c] + CO2_A[c] + CoenzymeA_A[c]	Fasn	EC-2.3.1.41| EC-2.3.1.85
RA_fat27_c	Fatty Acid Synthesis	Astrocyte	3-oxo-dodecanoyl-acp_A[c] + NADPH_A[c] -> R-3-hydroxydodecanoyl-acp_A[c] + NADP_A[c]	Fasn	EC-1.1.1.100 | EC-2.3.1.85
RA_fat28_c	Fatty Acid Synthesis	Astrocyte	R-3-hydroxydodecanoyl-acp_A[c] -> trans_dodec-2-enoyl-acp_A[c]	Fasn	EC-4.2.1.59 | EC-2.3.1.85
RA_fat29_c	Fatty Acid Synthesis	Astrocyte	trans_dodec-2-enoyl-acp_A[c] + NADPH_A[c] -> Dodecanoyl-acp_A[c] + NADP_A[c]	Fasn	EC-1.3.1.39 | EC-2.3.1.85
RA_fat30_c	Fatty Acid Synthesis	Astrocyte	Dodecanoyl-acp_A[c] -> Laurate_A[c]	Fasn	EC-3.1.2.21| EC-2.3.1.85
RA_fat31_c	Fatty Acid Synthesis	Astrocyte	Dodecanoyl-acp_A[c] + Malonyl-CoA_A[c] -> 3-oxo-myristoyl-acp_A[c] + CO2_A[c] + CoenzymeA_A[c]	Fasn	EC-2.3.1.41| EC-2.3.1.85
RA_fat32_c	Fatty Acid Synthesis	Astrocyte	3-oxo-myristoyl-acp_A[c] + NADPH_A[c] -> 3R-3-hydroxymyristoyl-acp_A[c] + NADP_A[c]	Cbr4 | Fasn	EC-1.1.1.100 | EC-2.3.1.85
RA_fat33_c	Fatty Acid Synthesis	Astrocyte	3R-3-hydroxymyristoyl-acp_A[c] -> trans_tetradec-2-enoyl-acp_A[c]	Fasn	EC-4.2.1.59 | EC-2.3.1.85
RA_fat34_c	Fatty Acid Synthesis	Astrocyte	trans_tetradec-2-enoyl-acp_A[c] + NADPH_A[c] -> Myristoyl-acp_A[c] + NADP_A[c]	Fasn	EC-1.3.1.39 | EC-2.3.1.85
RA_fat35_c	Fatty Acid Synthesis	Astrocyte	Myristoyl-acp_A[c] + Malonyl-CoA_A[c] -> 3-oxo-palmitoyl-acp_A[c] + CO2_A[c] + CoenzymeA_A[c]	Fasn	EC-2.3.1.41| EC-2.3.1.85
RA_fat36_c	Fatty Acid Synthesis	Astrocyte	3-oxo-palmitoyl-acp_A[c] + NADPH_A[c] -> R-3-hydroxypalmitoyl-acp_A[c] + NADP_A[c]	Cbr4 | Fasn	EC-1.1.1.100 | EC-2.3.1.85
RA_fat37_c	Fatty Acid Synthesis	Astrocyte	R-3-hydroxypalmitoyl-acp_A[c] -> trans_hexadecenoyl-acp_A[c]	Fasn	EC-4.2.1.61| EC-2.3.1.85
RA_fat38_c	Fatty Acid Synthesis	Astrocyte	trans_hexadecenoyl-acp_A[c] + NADPH_A[c] -> Palmitoyl-acp_A[c] + NADP_A[c]	Fasn	EC-1.3.1.39 | EC-2.3.1.85
RA_fat39_c	Fatty Acid Synthesis	Astrocyte	Palmitoyl-acp_A[c] <-> Palmitate_A[c]	Fasn	EC-3.1.2.14| EC-2.3.1.85
RA_fat40_c	Fatty Acid Synthesis	Astrocyte	Palmitate_A[c] + ATP_A[c] + CoenzymeA_A[c] -> Palmitoyl-CoA_A[c] + AMP_A[c] + diphosphate_A[c]	Acsbg2 | Acsbg1 | Slc27a2 | Slc27a5 | Slc27a6 | Acsl3 | Acsl4 | Acsl5 | Acsl6 | Acsm1 | Acsm2 | Acsm3 | Acsm4 | Acsm5	EC-6.2.1.3
RA_fat41_c	Fatty Acid Synthesis	Astrocyte	Palmitoyl-CoA_A[c] + Malonyl-CoA_A[c] -> 3-oxo-stearoyl-CoA_A[c] + CO2_A[c] + CoenzymeA_A[c]		EC-2.3.1-
RA_fat42_c	Fatty Acid Synthesis	Astrocyte	3-oxo-stearoyl-CoA_A[c] + NADPH_A[c] -> 3-hydroxy-stearoyl-CoA_A[c] + NADP_A[c]		EC-1.1.1.36
RA_fat43_c	Fatty Acid Synthesis	Astrocyte	3-hydroxy-stearoyl-CoA_A[c] -> trans-2-3-stearoyl-CoA_A[c]	Ehhadh | Echs1	EC-4.2.1.119
RA_fat44_c	Fatty Acid Synthesis	Astrocyte	trans-2-3-stearoyl-CoA_A[c] + NADPH_A[c] -> Stearoyl-CoA_A[c] + NADP_A[c]	Pecr | Mecr	EC-1.3.1-
RA_fat45_c	Fatty Acid Synthesis	Astrocyte	Stearoyl-CoA_A[c] -> Stearate_A[c] + CoenzymeA_A[c]	Acot1 | Acot2 | Acot3 | Acot4 | Acot5 | Acot7 | Acot8 | Acot9 | Acot10 | Olah	EC-3.1.2.2
RA_fat46_c	Fatty Acid Synthesis	Astrocyte	Stearoyl-CoA_A[c] + O2_A[c] -> Oleoyl-CoA_A[c]	Fads1 | Fads3 | Fads2 | Scd4 | Scd1 | Scd2 | Cyb5	EC-1.14.19.1
RA_fat47_c	Fatty Acid Synthesis	Astrocyte	Oleoyl-CoA_A[c] -> Oleate_A[c] + CoenzymeA_A[c]	Acot1 | Acot2 | Acot3 | Acot4 | Acot5 | Acot7 | Acot8 | Acot9 | Acot10 | Olah	EC-3.1.2
RA_fat48_c	Fatty Acid Synthesis	Astrocyte	Linoleate_A[c] + ATP_A[c] + CoenzymeA_A[c] -> Linoleoyl-CoA_A[c] + AMP_A[c] + diphosphate_A[c]	Acsm1 | Acsm3 | Acsm5 | Acsm4 | Acsbg1 | Acsbg2 | Acsl3 | Acsl4 | Acsl5 | Acsl6 | Slc27a2	EC-6.2.1.3
RA_fat49_c	Fatty Acid Synthesis	Astrocyte	Linoleoyl-CoA_A[c] + O2_A[c] -> gamma-Linoleoyl-CoA_A[c]	Fads2	EC-1.14.19.3
RA_fat50_c	Fatty Acid Synthesis	Astrocyte	gamma-Linoleoyl-CoA_A[c] + Malonyl-CoA_A[c] -> 3-oxodihomo-gamma-Linolenoyl-CoA_A[c] + CO2_A[c] + CoenzymeA_A[c]	Elovl7 | Elovl5	EC-2.3.1.-
RA_fat51_c	Fatty Acid Synthesis	Astrocyte	3-oxodihomo-gamma-Linolenoyl-CoA_A[c] + NADPH_A[c] -> 3R-hydroxydihomo-gamma-Linolenoyl-CoA_A[c] + NADP_A[c]	Hsd17b12	EC-1.1.1.330
RA_fat52_c	Fatty Acid Synthesis	Astrocyte	3R-hydroxydihomo-gamma-Linolenoyl-CoA_A[c] -> dihomo-gamma-Linolenoyl-2-enoyl-CoA_A[c]		EC-4.2.1.134
RA_fat53_c	Fatty Acid Synthesis	Astrocyte	dihomo-gamma-Linolenoyl-2-enoyl-CoA_A[c] + NADH_A[c] -> dihomo-gamma-Linolenoyl-CoA_A[c] + NAD_A[c]		EC-1.3.1.93
RA_fat54_c	Fatty Acid Synthesis	Astrocyte	dihomo-gamma-Linolenoyl-CoA_A[c] + O2_A[c] -> Arachidonoyl-CoA_A[c]	Fads1	EC-1.14.19.44
RA_fat55_c	Fatty Acid Synthesis	Astrocyte	Arachidonoyl-CoA_A[c] -> Arachidonate_A[c] + CoenzymeA_A[c]
RA_fat56_c	Fatty Acid Synthesis	Astrocyte	Linolenate_A[c] + ATP_A[c] + CoenzymeA_A[c] -> alpha-linolenoyl-CoA_A[c] + AMP_A[c] + diphosphate_A[c]	Acsl1 | Acsm3 | Acsm5 | Acsm4 | Acsm1 | Acsl3 | Acsl4 | Acsl5 | Acsl6	EC-6.2.1.3
RA_fat57_c	Fatty Acid Synthesis	Astrocyte	alpha-linolenoyl-CoA_A[c] + O2_A[c] -> stearidonoyl-CoA_A[c]	Fads2	EC-1.14.19.3
RA_fat58_c	Fatty Acid Synthesis	Astrocyte	stearidonoyl-CoA_A[c] + Malonyl-CoA_A[c] -> (8Z,11Z,14Z,17Z)-3-oxoicosatetraenoyl-CoA_A[c] + CO2_A[c] + CoenzymeA_A[c]	Elovl5	EC-2.3.1.-
RA_fat59_c	Fatty Acid Synthesis	Astrocyte	(8Z,11Z,14Z,17Z)-3-oxoicosatetraenoyl-CoA_A[c] + NADPH_A[c] -> (3R,8Z,11Z,14Z,17Z)-3-hydroxyicosatetraenoyl-CoA_A[c] + NADP_A[c]		EC-1.1.1.330
RA_fat60_c	Fatty Acid Synthesis	Astrocyte	(3R,8Z,11Z,14Z,17Z)-3-hydroxyicosatetraenoyl-CoA_A[c] -> (2E,8Z,11Z,14Z,17Z)-icosapentaenoyl-CoA_A[c]		EC-4.2.1.134
RA_fat61_c	Fatty Acid Synthesis	Astrocyte	(2E,8Z,11Z,14Z,17Z)-icosapentaenoyl-CoA_A[c] + NADPH_A[c] -> (8Z,11Z,14Z,17Z)-icosatetraenoyl-CoA + NADP_A[c]		EC-1.3.1.93
RA_fat62_c	Fatty Acid Synthesis	Astrocyte	(8Z,11Z,14Z,17Z)-icosatetraenoyl-CoA + O2_A[c] -> (5Z,8Z,11Z,14Z,17Z)-icosapentaenoyl-CoA_A[c]	Fads1	EC-1.14.19.44
RA_fat63_c	Fatty Acid Synthesis	Astrocyte	(5Z,8Z,11Z,14Z,17Z)-icosapentaenoyl-CoA_A[c] + Malonyl-CoA_A[c] -> (5Z,8Z,11Z,14Z,17Z)-3-oxodocosapentaenoyl-CoA_A[c] + CoenzymeA_A[c] + CO2_A[c]	Elovl2 | Elovl5	EC-2.3.1.-
RA_fat64_c	Fatty Acid Synthesis	Astrocyte	(5Z,8Z,11Z,14Z,17Z)-3-oxodocosapentaenoyl-CoA_A[c] + NADPH_A[c] -> (3R,5Z,8Z,11Z,14Z,17Z)-3-hydroxydocosapentaenoyl-CoA_A[c] + NADP_A[c]	Hsd17b12	EC-1.1.1.330
RA_fat65_c	Fatty Acid Synthesis	Astrocyte	(3R,5Z,8Z,11Z,14Z,17Z)-3-hydroxydocosapentaenoyl-CoA_A[c] -> (2E,7Z,10Z,13Z,16Z,19Z)-docosahexaenoyl-CoA_A[c]		EC-4.2.1.134
RA_fat66_c	Fatty Acid Synthesis	Astrocyte	(2E,7Z,10Z,13Z,16Z,19Z)-docosahexaenoyl-CoA_A[c] + NADPH_A[c] -> (7Z,10Z,13Z,16Z,19Z)-docosapentaenoyl-CoA_A[c] + NADP_A[c]		EC-1.3.1.93
RA_fat67_c	Fatty Acid Synthesis	Astrocyte	(7Z,10Z,13Z,16Z,19Z)-docosapentaenoyl-CoA_A[c] + Malonyl-CoA_A[c] -> (9Z,12Z,15Z,18Z,21Z)-3-oxotetracosapentaenoyl-CoA_A[c] + CoenzymeA_A[c] + CO2_A[c]	Elovl2	EC-2.3.1.-
RA_fat68_c	Fatty Acid Synthesis	Astrocyte	(9Z,12Z,15Z,18Z,21Z)-3-oxotetracosapentaenoyl-CoA_A[c] + NADPH_A[c] -> (3R,9Z,12Z,15Z,18Z,21Z)-3-hydroxytetracosapentaenoyl-CoA_A[c] + NADP_A[c]	Hadh	EC-1.1.1.330
RA_fat69_c	Fatty Acid Synthesis	Astrocyte	(3R,9Z,12Z,15Z,18Z,21Z)-3-hydroxytetracosapentaenoyl-CoA_A[c] -> (2E,9Z,12Z,15Z,18Z,21Z)-tetracosahexaenoyl-CoA_A[c]	Hsd17b4	EC-4.2.1.134
RA_fat70_c	Fatty Acid Synthesis	Astrocyte	(2E,9Z,12Z,15Z,18Z,21Z)-tetracosahexaenoyl-CoA_A[c] + NADPH_A[c] -> (9Z,12Z,15Z,18Z,21Z)-tetracosapentaenoyl-CoA_A[c] + NADP_A[c]		EC-1.3.1.93
RA_fat71_c	Fatty Acid Synthesis	Astrocyte	(9Z,12Z,15Z,18Z,21Z)-tetracosapentaenoyl-CoA_A[c] + O2_A[c] -> (6Z,9Z,12Z,15Z,18Z,21Z)-tetracosahexaenoyl-CoA_A[c]	Fads2	EC-1.14.19.3
RA_fat72_c	Fatty Acid Synthesis	Astrocyte	(6Z,9Z,12Z,15Z,18Z,21Z)-tetracosahexaenoyl-CoA_A[c] + O2_A[c] -> (2E,6Z,9Z,12Z,15Z,18Z,21Z)-tetracosaheptaenoyl-CoA_A[c] + H2O2_A[c]		EC-1.3.3.6
RA_fat73_c	Fatty Acid Synthesis	Astrocyte	(2E,6Z,9Z,12Z,15Z,18Z,21Z)-tetracosaheptaenoyl-CoA_A[c] -> (3S,6Z,9Z,12Z,15Z,18Z,21Z)-3-hydroxytetracosahexaenoyl-CoA_A[c]	Ehhadh | Echs1	EC-4.2.1.17
RA_fat74_c	Fatty Acid Synthesis	Astrocyte	(3S,6Z,9Z,12Z,15Z,18Z,21Z)-3-hydroxytetracosahexaenoyl-CoA_A[c] + NAD_A[c] -> (6Z,9Z,12Z,15Z,18Z,21Z)-3-oxotetracosahexaenoyl-CoA_A[c] + NADH_A[c]	Ehhadh | Hadh | Hsd17b10	EC-1.1.1.-
RA_fat75_c	Fatty Acid Synthesis	Astrocyte	(6Z,9Z,12Z,15Z,18Z,21Z)-3-oxotetracosahexaenoyl-CoA_A[c] + CoenzymeA_A[c] -> (4Z,7Z,10Z,13Z,16Z,19Z)-docosahexaenoyl-CoA_A[c] + Acetyl-CoA_A[c]		EC-2.3.1.16
RA_fat76_c	Fatty Acid Synthesis	Astrocyte	(4Z,7Z,10Z,13Z,16Z,19Z)-docosahexaenoyl-CoA_A[c] -> Decosahexenoate_A[c] + CoenzymeA_A[c]
RN_fat1_m	Fatty Acid Synthesis	Neuron	Acetyl-CoA_N[m] + CO2_N[m] <-> Malonyl-CoA_N[m]	Mlycd	EC-4.1.1.9
RN_fat2_c	Fatty Acid Synthesis	Neuron	Acetyl-CoA_N[c] + CO2_N[c] <-> Malonyl-CoA_N[c]	Mlycd	EC-4.1.1.9
RN_fat3_m	Fatty Acid Synthesis	Neuron	Acetyl-CoA_N[m] + ATP_N[m] + Bicarbonate_N[m] -> Malonyl-CoA_N[m] + ADP_N[m] + phosphate_N[m]	Acaca | Acacb	EC-6.4.1.2
RN_fat4_c	Fatty Acid Synthesis	Neuron	Acetyl-CoA_N[c] + ATP_N[c] + Bicarbonate_N[c] -> Malonyl-CoA_N[c] + ADP_N[c] + phosphate_N[c]	Acaca	EC-6.4.1.2
RN_fat5_c	Fatty Acid Synthesis	Neuron	Acetyl-CoA_N[c] <-> Acetyl-acp_N[c] + CoenzymeA_N[c]	Fasn	EC-2.3.1.38
RN_fat6_m	Fatty Acid Synthesis	Neuron	Malonyl-CoA_N[m] <-> Malonyl-acp_N[m] + CoenzymeA_N[m]	Mcat | Fasn	EC-2.3.1.39
RN_fat7_m	Fatty Acid Synthesis	Neuron	Malonyl-acp_N[m] + Acetyl-acp_N[m] <-> Acetoacetyl-acp_N[m] + CO2_N[m]	Oxsm	EC-2.3.1.41
RN_fat8_c	Fatty Acid Synthesis	Neuron	Malonyl-acp_N[c] + Acetyl-acp_N[c] <-> Acetoacetyl-acp_N[c] + CO2_N[c]	Oxsm | Fasn	EC-2.3.1.41
RN_fat9_c	Fatty Acid Synthesis	Neuron	Acetoacetyl-acp_N[c] + NADPH_N[c] -> R-3-hydroxybutanoyl-acp_N[c] + NADP_N[c]	Cbr4 | Fasn	EC-1.1.1.100
RN_fat10_c	Fatty Acid Synthesis	Neuron	R-3-hydroxybutanoyl-acp_N[c] -> Crotonyl-acp_N[c]	Fasn	EC-4.2.1.58
RN_fat11_c	Fatty Acid Synthesis	Neuron	Crotonyl-acp_N[c] + NADPH_N[c] -> Butyryl-acp_N[c] + NADP_N[c]	Fasn	EC-1.3.1.39
RN_fat12_c	Fatty Acid Synthesis	Neuron	Butyryl-acp_N[c] + Malonyl-CoA_N[c] -> 3-oxo-hexanoyl-acp_N[c] + CO2_N[c] + CoenzymeA_N[c]	Fasn	EC-2.3.1.41
RN_fat13_c	Fatty Acid Synthesis	Neuron	3-oxo-hexanoyl-acp_N[c] + NADPH_N[c] -> R-3-hydroxyhexanoyl-acp_N[c] + NADP_N[c]	Cbr4 | Fasn	EC-1.1.1.100
RN_fat14_c	Fatty Acid Synthesis	Neuron	R-3-hydroxyhexanoyl-acp_N[c] -> trans_hex-2-enoyl-acp_N[c]	Fasn	EC-4.2.1.59
RN_fat15_c	Fatty Acid Synthesis	Neuron	trans_hex-2-enoyl-acp_N[c] + NADPH_N[c] -> Hexanoyl-acp_N[c] + NADP_N[c]	Fasn	EC-1.3.1.39
RN_fat16_c	Fatty Acid Synthesis	Neuron	Hexanoyl-acp_N[c] + Malonyl-CoA_N[c] -> 3-oxo-octanoyl-acp_N[c] + CO2_N[c] + CoenzymeA_N[c]	Fasn	EC-2.3.1.41
RN_fat17_c	Fatty Acid Synthesis	Neuron	3-oxo-octanoyl-acp_N[c] + NADPH_N[c] -> R-3-hydroxyoctanoyl-acp_N[c] + NADP_N[c]	Cbr4 | Fasn	EC-1.1.1.100
RN_fat18_c	Fatty Acid Synthesis	Neuron	R-3-hydroxyoctanoyl-acp_N[c] -> trans_oct-2-enoyl-acp_N[c]	Fasn	EC-4.2.1.59
RN_fat19_c	Fatty Acid Synthesis	Neuron	trans_oct-2-enoyl-acp_N[c] + NADPH_N[c] -> Octanoyl-acp_N[c] + NADP_N[c]	Fasn	EC-1.3.1.39
RN_fat20_c	Fatty Acid Synthesis	Neuron	Octanoyl-acp_N[c] + Malonyl-CoA_N[c] -> 3-oxo-decanoyl-acp_N[c] + CO2_N[c] + CoenzymeA_N[c]	Fasn	EC-2.3.1.41
RN_fat21_c	Fatty Acid Synthesis	Neuron	3-oxo-decanoyl-acp_N[c] + NADPH_N[c] -> R-3-hydroxydecanoyl-acp_N[c] + NADP_N[c]	Cbr4 | Fasn	EC-1.1.1.100
RN_fat22_c	Fatty Acid Synthesis	Neuron	R-3-hydroxydecanoyl-acp_N[c] -> trans-delta2-decenoyl-acp_N[c]	Fasn	EC-4.2.1.59
RN_fat23_c	Fatty Acid Synthesis	Neuron	trans-delta2-decenoyl-acp_N[c] + NADPH_N[c] -> Decanoyl-acp_N[c] + NADP_N[c]	Fasn	EC-1.3.1.39
RN_fat24_c	Fatty Acid Synthesis	Neuron	Decanoyl-acp_N[c] + Malonyl-CoA_N[c] -> 3-oxo-dodecanoyl-acp_N[c] + CO2_N[c] + CoenzymeA_N[c]	Fasn	EC-2.3.1.41
RN_fat25_c	Fatty Acid Synthesis	Neuron	3-oxo-dodecanoyl-acp_N[c] + NADPH_N[c] -> R-3-hydroxydodecanoyl-acp_N[c] + NADP_N[c]	Fasn	EC-1.1.1.100
RN_fat26_c	Fatty Acid Synthesis	Neuron	R-3-hydroxydodecanoyl-acp_N[c] -> trans_dodec-2-enoyl-acp_N[c]	Fasn	EC-4.2.1.59
RN_fat27_c	Fatty Acid Synthesis	Neuron	trans_dodec-2-enoyl-acp_N[c] + NADPH_N[c] -> Dodecanoyl-acp_N[c] + NADP_N[c]	Fasn	EC-1.3.1.39
RN_fat28_c	Fatty Acid Synthesis	Neuron	Dodecanoyl-acp_N[c] -> Laurate_N[c]	Fasn	EC-3.1.2.21
RN_fat29_c	Fatty Acid Synthesis	Neuron	Dodecanoyl-acp_N[c] + Malonyl-CoA_N[c] -> 3-oxo-myristoyl-acp_N[c] + CO2_N[c] + CoenzymeA_N[c]	Fasn	EC-2.3.1.41
RN_fat30_c	Fatty Acid Synthesis	Neuron	3-oxo-myristoyl-acp_N[c] + NADPH_N[c] -> 3R-3-hydroxymyristoyl-acp_N[c] + NADP_N[c]	Cbr4 | Fasn	EC-1.1.1.100
RN_fat31_c	Fatty Acid Synthesis	Neuron	3R-3-hydroxymyristoyl-acp_N[c] -> trans_tetradec-2-enoyl-acp_N[c]	Fasn	EC-4.2.1.59
RN_fat32_c	Fatty Acid Synthesis	Neuron	trans_tetradec-2-enoyl-acp_N[c] + NADPH_N[c] -> Myristoyl-acp_N[c] + NADP_N[c]	Fasn	EC-1.3.1.39
RN_fat33_c	Fatty Acid Synthesis	Neuron	Myristoyl-acp_N[c] + Malonyl-CoA_N[c] -> 3-oxo-palmitoyl-acp_N[c] + CO2_N[c] + CoenzymeA_N[c]	Fasn	EC-2.3.1.41
RN_fat34_c	Fatty Acid Synthesis	Neuron	3-oxo-palmitoyl-acp_N[c] + NADPH_N[c] -> R-3-hydroxypalmitoyl-acp_N[c] + NADP_N[c]	Cbr4 | Fasn	EC-1.1.1.100
RN_fat35_c	Fatty Acid Synthesis	Neuron	R-3-hydroxypalmitoyl-acp_N[c] -> trans_hexadecenoyl-acp_N[c]	Fasn	EC-4.2.1.61
RN_fat36_c	Fatty Acid Synthesis	Neuron	trans_hexadecenoyl-acp_N[c] + NADPH_N[c] -> Palmitoyl-acp_N[c] + NADP_N[c]	Fasn	EC-1.3.1.39
RN_fat37_c	Fatty Acid Synthesis	Neuron	Palmitoyl-acp_N[c] <-> Palmitate_N[c]	Fasn	EC-3.1.2.14
RN_fat38_c	Fatty Acid Synthesis	Neuron	Palmitate_N[c] + ATP_N[c] + CoenzymeA_N[c] -> Palmitoyl-CoA_N[c] + AMP_N[c] + diphosphate_N[c]	Acsbg2 | Acsbg1 | Slc27a2 | Slc27a5 | Slc27a6 | Acsl3 | Acsl4 | Acsl5 | Acsl6 | Acsm1 | Acsm2 | Acsm3 | Acsm4 | Acsm5	EC-6.2.1.3
RN_fat39_c	Fatty Acid Synthesis	Neuron	Palmitoyl-CoA_N[c] + Malonyl-CoA_N[c] -> 3-oxo-stearoyl-CoA_N[c] + CO2_N[c] + CoenzymeA_N[c]		EC-2.3.1-
RN_fat40_c	Fatty Acid Synthesis	Neuron	3-oxo-stearoyl-CoA_N[c] + NADPH_N[c] -> 3-hydroxy-stearoyl-CoA_N[c] + NADP_N[c]		EC-1.1.1.36
RN_fat41_c	Fatty Acid Synthesis	Neuron	3-hydroxy-stearoyl-CoA_N[c] -> trans-2-3-stearoyl-CoA_N[c]	Ehhadh | Echs1	EC-4.2.1.119
RN_fat42_c	Fatty Acid Synthesis	Neuron	trans-2-3-stearoyl-CoA_N[c] + NADPH_N[c] -> Stearoyl-CoA_N[c] + NADP_N[c]	Pecr | Mecr	EC-1.3.1-
RN_fat43_c	Fatty Acid Synthesis	Neuron	Stearoyl-CoA_N[c] -> Stearate_N[c] + CoenzymeA_N[c]	Acot1 | Acot2 | Acot3 | Acot4 | Acot5 | Acot7 | Acot8 | Acot9 | Acot10 | Olah	EC-3.1.2.2
RN_fat44_c	Fatty Acid Synthesis	Neuron	Stearoyl-CoA_N[c] + O2_N[c] -> Oleoyl-CoA_N[c]	Fads1 | Fads3 | Fads2 | Scd4 | Scd1 | Scd2	EC-1.14.19.1
RN_fat45_c	Fatty Acid Synthesis	Neuron	Oleoyl-CoA_N[c] -> Oleate_N[c] + CoenzymeA_N[c]	Acot1 | Acot2 | Acot3 | Acot4 | Acot5 | Acot7 | Acot8 | Acot9 | Acot10 | Olah	EC-3.1.2
RAN_t20_c	Fatty Acid Synthesis	Intercellular	Arachidonate_A[c] -> Arachidonate_N[c]
RAN_t21_c	Fatty Acid Synthesis	Intercellular	Decosahexenoate_A[c] -> Decosahexenoate_N[c]
RA_fat77_c	Fatty Acid Synthesis	Astrocyte	0.243 Palmitate_A[c] + 0.249 Stearate_A[c] + 0.224 Oleate_A[c] + 0.098 Arachidonate_A[c] + 0.186 Decosahexenoate_A[c] -> 1 FattyAcid_A[c]
RN_fat46_c	Fatty Acid Synthesis	Neuron	0.243 Palmitate_N[c] + 0.249 Stearate_N[c] + 0.224 Oleate_N[c] + 0.098 Arachidonate_N[c] + 0.186 Decosahexenoate_N[c] -> 1 FattyAcid_N[c]
RA_pe1_c	Phosphatidylethanolamine Metabolism	Astrocyte	ATP_A[c] + Ethanolamine_A[c] -> Phosphoryl-ethanolamine_A[c] + ADP_A[c]	Etnk1 | Etnk2 | Chka | Chkb	EC-2.7.1.82
RA_pe2_c	Phosphatidylethanolamine Metabolism	Astrocyte	Phosphoryl-ethanolamine_A[c] + CTP_A[c] -> CDP-ethanolamine_A[c] + diphosphate_A[c]	Pcyt2	EC-2.7.7.14
RA_pe3_c	Phosphatidylethanolamine Metabolism	Astrocyte	1_2-diacylglycerol_A[c] + CDP-ethanolamine_A[c] -> Phosphatidyl-ethanolamine_A[c] + CMP_A[c]	Ept1 | Cept1 | Pigf	EC-2.7.8.1
RA_pe4_c	Phosphatidylethanolamine Metabolism | Phosphatidylcholine Metabolism	Astrocyte	Phosphatidyl-ethanolamine_A[c] -> Phosphatidyl-choline_A[c]	Pemt	EC-2.1.1.17
RA_pe5_c	Phosphatidylethanolamine Metabolism	Astrocyte	Phosphatidyl-ethanolamine_A[c] + Serine_A[c] -> Ethanolamine_A[c] + Phosphatidyl-serine_A[c]	Ptdss2	EC-2.7.8.29
RA_pe6_c	Phosphatidylethanolamine Metabolism	Astrocyte	Phosphatidyl-serine_A[c] -> Phosphatidyl-ethanolamine_A[c] + CO2_A[c]	Pisd-ps2 | Pisd-ps3 | Pisd	EC-4.1.1.65
RN_pe1_c	Phosphatidylethanolamine Metabolism	Neuron	ATP_N[c] + Ethanolamine_N[c] -> Phosphoryl-ethanolamine_N[c] + ADP_N[c]	Etnk1 | Etnk2 | Chka | Chkb	EC-2.7.1.82
RN_pe2_c	Phosphatidylethanolamine Metabolism	Neuron	Phosphoryl-ethanolamine_N[c] + CTP_N[c] -> CDP-ethanolamine_N[c] + diphosphate_N[c]	Pcyt2	EC-2.7.7.14
RN_pe3_c	Phosphatidylethanolamine Metabolism	Neuron	1_2-diacylglycerol_N[c] + CDP-ethanolamine_N[c] -> Phosphatidyl-ethanolamine_N[c] + CMP_N[c]	Ept1 | Cept1 | Pigf	EC-2.7.8.1
RN_pe4_c	Phosphatidylethanolamine Metabolism | Phosphatidylcholine Metabolism	Neuron	Phosphatidyl-ethanolamine_N[c] -> Phosphatidyl-choline_N[c]	Pemt	EC-2.1.1.17
RN_pe5_c	Phosphatidylethanolamine Metabolism	Neuron	Phosphatidyl-ethanolamine_N[c] + Serine_N[c] -> Ethanolamine_N[c] + Phosphatidyl-serine_N[c]	Ptdss2	EC-2.7.8.29
RN_pe6_c	Phosphatidylethanolamine Metabolism	Neuron	Phosphatidyl-serine_N[c] -> Phosphatidyl-ethanolamine_N[c] + CO2_N[c]	Pisd-ps2 | Pisd-ps3 | Pisd	EC-4.1.1.65
RA_pc1_c	Phosphatidylcholine Metabolism	Astrocyte	Choline_A[c] + ATP_A[c] -> Phosphoryl-choline_A[c] + ADP_A[c]	Chka | Chkb	EC-2.7.1.32
RA_pc2_c	Phosphatidylcholine Metabolism	Astrocyte	Phosphoryl-choline_A[c] + CTP_A[c] -> CDP-choline_A[c] + diphosphate_A[c]	Pcyt1b | Pcyt1a	EC-2.7.7.15
RA_pc3_c	Phosphatidylcholine Metabolism	Astrocyte	1_2-diacylglycerol_A[c] + CDP-choline_A[c] -> Phosphatidyl-choline_A[c] + CMP_A[c]	Chpt1 | Cept1	EC-2.7.8.2
RN_pc1_c	Phosphatidylcholine Metabolism	Neuron	Choline_N[c] + ATP_N[c] -> Phosphoryl-choline_N[c] + ADP_N[c]	Chka | Chkb	EC-2.7.1.32
RN_pc2_c	Phosphatidylcholine Metabolism	Neuron	Phosphoryl-choline_N[c] + CTP_N[c] -> CDP-choline_N[c] + diphosphate_N[c]	Pcyt1b | Pcyt1a	EC-2.7.7.15
RN_pc3_c	Phosphatidylcholine Metabolism	Neuron	1_2-diacylglycerol_N[c] + CDP-choline_N[c] -> Phosphatidyl-choline_N[c] + CMP_N[c]	Chpt1 | Cept1	EC-2.7.8.2
RA_card1_m	Cardiolipin Metabolism	Astrocyte	CDP-diacylglycerol_A[m] + Glycerol-3-phosphate_A[m] -> CMP_A[m] + phosphatidylglycerol-phosphate_A[m]	Pgs1	EC-2.7.8.5
RA_card2_c	Cardiolipin Metabolism	Astrocyte	CDP-diacylglycerol_A[c] + Glycerol-3-phosphate_A[c] -> CMP_A[c] + phosphatidylglycerol-phosphate_A[c]	Pgs1	EC-2.7.8.5
RA_card3_m	Cardiolipin Metabolism	Astrocyte	phosphatidylglycerol-phosphate_A[m] -> phosphatidyl-glycerol_A[m] + phosphate_A[m]		EC-3.1.3.27
RA_card4_m	Cardiolipin Metabolism	Astrocyte	phosphatidyl-glycerol_A[m] + CDP-diacylglycerol_A[m] -> cardiolipin_A[m] + CMP_A[m] + diphosphate_A[m]
RN_card1_m	Cardiolipin Metabolism	Neuron	CDP-diacylglycerol_N[m] + Glycerol-3-phosphate_N[m] -> CMP_N[m] + phosphatidylglycerol-phosphate_N[m]	Pgs1	EC-2.7.8.5
RN_card2_c	Cardiolipin Metabolism	Neuron	CDP-diacylglycerol_N[c] + Glycerol-3-phosphate_N[c] -> CMP_N[c] + phosphatidylglycerol-phosphate_N[c]	Pgs1	EC-2.7.8.5
RN_card3_m	Cardiolipin Metabolism	Neuron	phosphatidylglycerol-phosphate_N[m] -> phosphatidyl-glycerol_N[m] + phosphate_N[m]		EC-3.1.3.27
RN_card4_m	Cardiolipin Metabolism	Neuron	phosphatidyl-glycerol_N[m] + CDP-diacylglycerol_N[m] -> cardiolipin_N[m] + CMP_N[m] + diphosphate_N[m]		[]
RA_sph1_c	Sphingomyelin Metabolism	Astrocyte	Serine_A[c] + Palmitoyl-CoA_A[c] -> CO2_A[c] + 3-dehydrosphinganine_A[c] + CoenzymeA_A[c]	Sptlc1 | Sptlc2 | Sptlc3	EC-2.3.1.50
RA_sph2_c	Sphingomyelin Metabolism	Astrocyte	3-dehydrosphinganine_A[c] + NADPH_A[c] <-> sphinganine_A[c] + NADP_A[c]	Kdsr	EC-1.1.1.102
RA_sph3_c	Sphingomyelin Metabolism	Astrocyte	sphinganine_A[c] + FattyAcid_A[c] <-> dihydroceramide_A[c]	Cers1 | Cers2 | Cers3 | Cers4 | Cers5 | Cers6
RA_sph4_c	Sphingomyelin Metabolism	Astrocyte	dihydroceramide_A[c] <-> ceramide_A[c]	Degs2	[]
RA_sph5_c	Sphingomyelin Metabolism	Astrocyte	ceramide_A[c] + Phosphatidyl-choline_A[c] <-> 1_2-diacylglycerol_A[c] + sphingomyelin_A[c]	Sgms1 | Sgms2	EC-2.7.8.27
RA_sph6_c	Sphingomyelin Metabolism	Astrocyte	sphingomyelin_A[c] -> ceramide_A[c] + Phosphoryl-choline_A[c]	Enpp4 | Smpd4 | Enpp7 | Smpd2 | Smpd3 | Smpd1	EC-3.1.4.12
RN_sph1_c	Sphingomyelin Metabolism	Neuron	Serine_N[c] + Palmitoyl-CoA_N[c] -> CO2_N[c] + 3-dehydrosphinganine_N[c] + CoenzymeA_N[c]	Sptlc1 | Sptlc2 | Sptlc3	EC-2.3.1.50
RN_sph2_c	Sphingomyelin Metabolism	Neuron	3-dehydrosphinganine_N[c] + NADPH_N[c] <-> sphinganine_N[c] + NADP_N[c]	Kdsr	EC-1.1.1.102
RN_sph3_c	Sphingomyelin Metabolism	Neuron	sphinganine_N[c] + FattyAcid_N[c] <-> dihydroceramide_N[c]	Cers1 | Cers2 | Cers3 | Cers4 | Cers5 | Cers6	EC-2.3.1
RN_sph4_c	Sphingomyelin Metabolism	Neuron	dihydroceramide_N[c] <-> ceramide_N[c]	Degs2	[]
RN_sph5_c	Sphingomyelin Metabolism	Neuron	ceramide_N[c] + Phosphatidyl-choline_N[c] <-> 1_2-diacylglycerol_N[c] + sphingomyelin_N[c]	Sgms1 | Sgms2	EC-2.7.8.27
RN_sph6_c	Sphingomyelin Metabolism	Neuron	sphingomyelin_N[c] -> ceramide_N[c] + Phosphoryl-choline_N[c]	Enpp4 | Smpd4 | Enpp7 | Smpd2 | Smpd3 | Smpd1	EC-3.1.4.12
RA_cdp-dag1_c	CDP-Diacylglycerol Biosynthesis	Astrocyte	Glycerol-3-phosphate_A[c] + FattyAcid_A[c] -> 1-acyl-sn-glycerol-3-phosphate_A[c]	Gpam | Gpat2	EC-2.3.1.15
RA_cdp-dag2_c	CDP-Diacylglycerol Biosynthesis	Astrocyte	1-acyl-sn-glycerol-3-phosphate_A[c] + FattyAcid_A[c] -> Phosphatidate_A[c]	Lclat1 | Agpat9 | Agpat1 | Agpat4 | Agpat3 | Agpat5 | Agpat6 | Agpat2 | Lpcat4	EC-2.3.1.51
RA_cdp-dag3_c	CDP-Diacylglycerol Biosynthesis	Astrocyte	CTP_A[c] + Phosphatidate_A[c] -> CDP-diacylglycerol_A[c] + diphosphate_A[c]	Cds1 | Cds2	EC-2.7.7.41
RN_cdp-dag1_c	CDP-Diacylglycerol Biosynthesis	Neuron	Glycerol-3-phosphate_N[c] + FattyAcid_N[c] -> 1-acyl-sn-glycerol-3-phosphate_N[c]	Gpam | Gpat2	EC-2.3.1.15
RN_cdp-dag2_c	CDP-Diacylglycerol Biosynthesis	Neuron	1-acyl-sn-glycerol-3-phosphate_N[c] + FattyAcid_N[c] -> Phosphatidate_N[c]	Lclat1 | Agpat9 | Agpat1 | Agpat4 | Agpat3 | Agpat5 | Agpat6 | Agpat2 | Lpcat4	EC-2.3.1.51
RN_cdp-dag3_c	CDP-Diacylglycerol Biosynthesis	Neuron	CTP_N[c] + Phosphatidate_N[c] -> CDP-diacylglycerol_N[c] + diphosphate_N[c]	Cds1 | Cds2	EC-2.7.7.41
RA_inos1_c	Inositol Metabolism	Astrocyte	myo-inositol_A[c] + CDP-diacylglycerol_A[c] -> phosphatidyl-inositol_A[c] + CMP_A[c]	Cdipt	EC-2.7.8.11
RA_inos2_c	Inositol Metabolism	Astrocyte	phosphatidyl-inositol_A[c] + ATP_A[c] -> phosphatidyl-1D-myo-inositol-4-phosphate_A[c] + ADP_A[c]	Pi4ka | Pi4k2a | Pi4k2b | Pi4kb	EC-2.7.1.67
RA_inos3_c	Inositol Metabolism	Astrocyte	phosphatidyl-1D-myo-inositol-4-phosphate_A[c] + ATP_A[c] <-> phosphatidyl-1D-myo-inositol-4-5-bisphosphate_A[c] + ADP_A[c]	Pip5k1b | Pip5k1c | Pip5k1a	EC-2.7.1.68
RA_inos4_c	Inositol Metabolism	Astrocyte	phosphatidyl-1D-myo-inositol-4-5-bisphosphate_A[c] -> 1_2-diacylglycerol_A[c] + myo-inositol-(1-4-5)-trisphosphate_A[c]	Plcz1 | Plcg2 | Plcd3 | Plch1 | Plch2 | Plcd4 | Plcb3 | Plce1 | Plcd1 | Plcb1 | Plcb2 | Plcg1	EC-3.1.4.11
RA_inos5_c	Inositol Metabolism	Astrocyte	myo-inositol-(1-4-5)-trisphosphate_A[c] -> myo-inositol-(1-4)-bisphosphate_A[c] + phosphate_A[c]	Inpp5a | Inpp5b | Inpp5d | Inpp5f | Inpp5j | Inpp5k	EC-3.1.3.56
RA_inos6_c	Inositol Metabolism	Astrocyte	myo-inositol-(1-4)-bisphosphate_A[c] <-> myo-inositol-4-monophosphate_A[c] + phosphate_A[c]	Inpp1	EC-3.1.3.57
RA_inos7_c	Inositol Metabolism	Astrocyte	myo-inositol-4-monophosphate_A[c] <-> myo-inositol_A[c] + phosphate_A[c]	Impa1 | Impa2 | Impad1	EC-3.1.3.25
RA_inos8_c	Inositol Metabolism	Astrocyte	ATP_A[c] + 1_2-diacylglycerol_A[c] -> Phosphatidate_A[c] + ADP_A[c]	Dgkh | Dgki | Dgkd | Dgkg | Dgkb | Dgke | Dgka | Agk | Dgkq | Dgkz	EC-2.7.1.107
RA_inos9_c	Inositol Metabolism	Astrocyte	myo-inositol-(1-4-5)-trisphosphate_A[c] + ATP_A[c] -> myo-inositol-(1-3-4-5)-tetrakisphosphate_A[c] + ADP_A[c]	Itpka | Itpkb | Itpkc	EC-2.7.1.127
RA_inos10_c	Inositol Metabolism	Astrocyte	myo-inositol-(1-3-4-5)-tetrakisphosphate_A[c] <-> myo-inositol-(1-3-4)-trisphosphate_A[c] + phosphate_A[c]	Inpp5j	EC-3.1.3.56
RA_inos11_c	Inositol Metabolism	Astrocyte	myo-inositol-(1-3-4)-trisphosphate_A[c] -> myo-inositol-(3-4)-bisphosphate_A[c] + phosphate_A[c]	Inpp1	EC-3.1.3.57
RA_inos12_c	Inositol Metabolism	Astrocyte	myo-inositol-(3-4)-bisphosphate_A[c] -> myo-inositol-3-monophosphate_A[c] + phosphate_A[c]	Inpp4b | Inpp4a	EC-3.1.3.66
RA_inos13_c	Inositol Metabolism	Astrocyte	myo-inositol-3-monophosphate_A[c] <-> myo-inositol_A[c] + phosphate_A[c]	Impa1 | Impa2 | Impad1	EC-3.1.3.25
RN_inos1_c	Inositol Metabolism	Neuron	myo-inositol_N[c] + CDP-diacylglycerol_N[c] -> phosphatidyl-inositol_N[c] + CMP_N[c]	Cdipt	EC-2.7.8.11
RN_inos2_c	Inositol Metabolism	Neuron	phosphatidyl-inositol_N[c] + ATP_N[c] -> phosphatidyl-1D-myo-inositol-4-phosphate_N[c] + ADP_N[c]	Pi4ka | Pi4k2a | Pi4k2b | Pi4kb	EC-2.7.1.67
RN_inos3_c	Inositol Metabolism	Neuron	phosphatidyl-1D-myo-inositol-4-phosphate_N[c] + ATP_N[c] <-> phosphatidyl-1D-myo-inositol-4-5-bisphosphate_N[c] + ADP_N[c]	Pip5k1b | Pip5k1c | Pip5k1a	EC-2.7.1.68
RN_inos4_c	Inositol Metabolism	Neuron	phosphatidyl-1D-myo-inositol-4-5-bisphosphate_N[c] -> 1_2-diacylglycerol_N[c] + myo-inositol-(1-4-5)-trisphosphate_N[c]	Plcz1 | Plcg2 | Plcd3 | Plch1 | Plch2 | Plcd4 | Plcb3 | Plce1 | Plcd1 | Plcb1 | Plcb2 | Plcg1	EC-3.1.4.11
RN_inos5_c	Inositol Metabolism	Neuron	myo-inositol-(1-4-5)-trisphosphate_N[c] -> myo-inositol-(1-4)-bisphosphate_N[c] + phosphate_N[c]	Inpp5a | Inpp5b | Inpp5d | Inpp5f | Inpp5j | Inpp5k	EC-3.1.3.56
RN_inos6_c	Inositol Metabolism	Neuron	myo-inositol-(1-4)-bisphosphate_N[c] <-> myo-inositol-4-monophosphate_N[c] + phosphate_N[c]	Inpp1	EC-3.1.3.57
RN_inos7_c	Inositol Metabolism	Neuron	myo-inositol-4-monophosphate_N[c] <-> myo-inositol_N[c] + phosphate_N[c]	Impa1 | Impa2 | Impad1	EC-3.1.3.25
RN_inos8_c	Inositol Metabolism	Neuron	ATP_N[c] + 1_2-diacylglycerol_N[c] -> Phosphatidate_N[c] + ADP_N[c]	Dgkh | Dgki | Dgkd | Dgkg | Dgkb | Dgke | Dgka | Agk | Dgkq | Dgkz	EC-2.7.1.107
RN_inos9_c	Inositol Metabolism	Neuron	myo-inositol-(1-4-5)-trisphosphate_N[c] + ATP_N[c] -> myo-inositol-(1-3-4-5)-tetrakisphosphate_N[c] + ADP_N[c]	Itpka | Itpkb | Itpkc	EC-2.7.1.127
RN_inos10_c	Inositol Metabolism	Neuron	myo-inositol-(1-3-4-5)-tetrakisphosphate_N[c] <-> myo-inositol-(1-3-4)-trisphosphate_N[c] + phosphate_N[c]	Inpp5j	EC-3.1.3.56
RN_inos11_c	Inositol Metabolism	Neuron	myo-inositol-(1-3-4)-trisphosphate_N[c] -> myo-inositol-(3-4)-bisphosphate_N[c] + phosphate_N[c]	Inpp1	EC-3.1.3.57
RN_inos12_c	Inositol Metabolism	Neuron	myo-inositol-(3-4)-bisphosphate_N[c] -> myo-inositol-3-monophosphate_N[c] + phosphate_N[c]	Inpp4b | Inpp4a	EC-3.1.3.66
RN_inos13_c	Inositol Metabolism	Neuron	myo-inositol-3-monophosphate_N[c] <-> myo-inositol_N[c] + phosphate_N[c]	Impa1 | Impa2 | Impad1	EC-3.1.3.25
RA_ros1_c	Reactive Oxygen Species Pathway	Astrocyte	Cystine_A[c] + NADH_A[c] -> 2 Cysteine_A[c] + NAD_A[c]		EC-1.8.1.6
RA_ros2_c	Reactive Oxygen Species Pathway	Astrocyte	Cysteine_A[c] + Glutamate_A[c] + ATP_A[c] -> L-gamma-glutamylcysteine_A[c] + ADP_A[c] + phosphate_A[c]	Gclc & Gclm	EC-6.3.2.2
RA_ros3_c	Reactive Oxygen Species Pathway	Astrocyte	L-gamma-glutamylcysteine_A[c] + Glycine_A[c] + ATP_A[c] -> ReducedGlutathione_A[c] + ADP_A[c] + phosphate_A[c]	Gss	EC-6.3.2.3
RA_ros4_c	Reactive Oxygen Species Pathway	Astrocyte	O2_A[c] -> H2O2_A[c]
RA_ros5_m	Reactive Oxygen Species Pathway	Astrocyte	O2_A[m] -> H2O2_A[m]
RA_ros6_c	Reactive Oxygen Species Pathway	Astrocyte	2 ReducedGlutathione_A[c] + H2O2_A[c] -> OxidizedGlutathione_A[c]	Gpx1 | Gpx2 | Gpx3 | Gpx4 | Gpx5 | Gpx6 | Gpx7 | Gpx8	EC-1.11.1.9
RA_ros7_c	Reactive Oxygen Species Pathway	Astrocyte	OxidizedGlutathione_A[c] + NADPH_A[c] -> 2 ReducedGlutathione_A[c] + NADP_A[c]	Gsr	EC-1.8.1.7
RA_ros8_m	Reactive Oxygen Species Pathway	Astrocyte	OxidizedGlutathione_A[m] + NADPH_A[m] -> 2 ReducedGlutathione_A[m] + NADP_A[m]	Gsr	EC-1.8.1.8
RA_ros9_m	Reactive Oxygen Species Pathway	Astrocyte	2 H2O2_A[m] -> O2_A[m]	Cat	EC-1.11.1.6
RA_ros10_c	Reactive Oxygen Species Pathway	Astrocyte	2 H2O2_A[c] -> O2_A[c]	Cat	EC-1.11.1.6
RA_ros11_c	Reactive Oxygen Species Pathway	Astrocyte	ReducedGlutathione_A[c] -> Glutamate_A[c] + CysteinylGlycine_A[c]	Ggt1 | Ggt5 | Ggt6	EC-3.4.19.13
RAN_t22_c	Reactive Oxygen Species Pathway	Intercellular	CysteinylGlycine_A[c] -> CysteinylGlycine_N[c]
RN_ros1_c	Reactive Oxygen Species Pathway	Neuron	CysteinylGlycine_N[c] -> Cysteine_N[c] + Glycine_N[c]	Anpep | Cndp2 | Pepc	EC-3.4.11.2 | EC-3.4.13.18
RN_ros2_c	Reactive Oxygen Species Pathway	Neuron	Cysteine_N[c] + Glutamate_N[c] + ATP_N[c] -> L-gamma-glutamylcysteine_N[c] + ADP_N[c] + phosphate_N[c]	Gclc & Gclm	EC-6.3.2.2
RN_ros3_c	Reactive Oxygen Species Pathway	Neuron	L-gamma-glutamylcysteine_N[c] + Glycine_N[c] + ATP_N[c] -> ReducedGlutathione_N[c] + ADP_N[c] + phosphate_N[c]	Gss	EC-6.3.2.3
RN_ros4_c	Reactive Oxygen Species Pathway	Neuron	O2_N[c] -> H2O2_N[c]
RN_ros5_m	Reactive Oxygen Species Pathway	Neuron	O2_N[m] -> H2O2_N[m]
RN_ros6_c	Reactive Oxygen Species Pathway	Neuron	2 ReducedGlutathione_N[c] + H2O2_N[c] -> OxidizedGlutathione_N[c]	Gpx1 | Gpx2 | Gpx3 | Gpx4 | Gpx5 | Gpx6 | Gpx7 | Gpx8	EC-1.11.1.9
RN_ros7_c	Reactive Oxygen Species Pathway	Neuron	OxidizedGlutathione_N[c] + NADPH_N[c] -> 2 ReducedGlutathione_N[c] + NADP_N[c]	Gsr	EC-1.8.1.7
RN_ros8_m	Reactive Oxygen Species Pathway	Neuron	OxidizedGlutathione_N[m] + NADPH_N[m] -> 2 ReducedGlutathione_N[m] + NADP_N[m]	Gsr	EC-1.8.1.8
RN_ros9_m	Reactive Oxygen Species Pathway	Neuron	2 H2O2_N[m] -> O2_N[m]	Cat	EC-1.11.1.6
RN_ros10_c	Reactive Oxygen Species Pathway	Neuron	2 H2O2_N[c] -> O2_N[c]	Cat	EC-1.11.1.6
RA_crn1_c	Creatine Metabolism	Astrocyte	Glycine_A[c] + Arginine_A[c] -> Ornithine_A[c] + Guanidinoacetate_A[c]	Gatm	EC-2.1.4.1
RA_crn2_m	Creatine Metabolism	Astrocyte	Glycine_A[m] + Arginine_A[m] -> Ornithine_A[m] + Guanidinoacetate_A[m]	Gatm	EC-2.1.4.1
RA_crn3_c	Creatine Metabolism	Astrocyte	Guanidinoacetate_A[c] + S-adenosyl-L-methionine_A[c] -> S-adenosyl-L-homocysteine_A[c] + Creatine_A[c]	Gamt	EC-2.1.1.2
RA_crn4_c	Creatine Metabolism	Astrocyte	Creatine_A[c] + ATP_A[c] <-> CreatinePhosphate_A[c] + ADP_A[c]	Ckb & Ckm	EC-2.7.3.2
RA_crn5_m	Creatine Metabolism	Astrocyte	Creatine_A[m] + ATP_A[m] <-> CreatinePhosphate_A[m] + ADP_A[m]	Ckmt1 & Ckmt2 & Slc25a4 & Vdac1 & Vdac2 & Vdac3	EC-2.7.3.2
RN_crn1_c	Creatine Metabolism	Neuron	Glycine_N[c] + Arginine_N[c] -> Ornithine_N[c] + Guanidinoacetate_N[c]	Gatm	EC-2.1.4.1
RN_crn2_m	Creatine Metabolism	Neuron	Glycine_N[m] + Arginine_N[m] -> Ornithine_N[m] + Guanidinoacetate_N[m]	Gatm	EC-2.1.4.1
RN_crn3_c	Creatine Metabolism	Neuron	Guanidinoacetate_N[c] + S-adenosyl-L-methionine_N[c] -> S-adenosyl-L-homocysteine_N[c] + Creatine_N[c]	Gamt	EC-2.1.1.2
RN_crn4_c	Creatine Metabolism	Neuron	Creatine_N[c] + ATP_N[c] <-> CreatinePhosphate_N[c] + ADP_N[c]	Ckb & Ckm	EC-2.7.3.2
RN_crn5_m	Creatine Metabolism	Neuron	Creatine_N[m] + ATP_N[m] <-> CreatinePhosphate_N[m] + ADP_N[m]	Ckmt1 & Ckmt2 & Slc25a4 & Vdac1 & Vdac2 & Vdac3	EC-2.7.3.2
RA_heme1_m	Heme Metabolism	Astrocyte	Glycine_A[m] + Succinyl-CoA_A[m] -> CO2_A[m] + 5-amino-levulinate_A[m] + CoenzymeA_A[m]	Alas2 | Alas1	EC-2.3.1.37
RA_heme2_c	Heme Metabolism	Astrocyte	Glycine_A[c] + Succinyl-CoA_A[c] -> CO2_A[c] + 5-amino-levulinate_A[c] + CoenzymeA_A[c]	Alas1	EC-2.3.1.37
RA_heme3_c	Heme Metabolism	Astrocyte	2 5-amino-levulinate_A[c] -> porphobilinogen_A[c]	Alad	EC-4.2.1.24
RA_heme4_c	Heme Metabolism	Astrocyte	4 porphobilinogen_A[c] -> 4 NH4_A[c] + hydroxymethylbilane_A[c]	Hmbs	EC-2.5.1.61
RA_heme5_c	Heme Metabolism	Astrocyte	hydroxymethylbilane_A[c] -> uroporphyrinogen_A[c]	Uros	EC-4.2.1.75
RA_heme6_c	Heme Metabolism	Astrocyte	uroporphyrinogen_A[c] -> 4 CO2_A[c] + coproporphyrinogen_A[c]	Urod	EC-4.1.1.37
RA_heme7_m	Heme Metabolism	Astrocyte	coproporphyrinogen_A[m] + O2_A[m] -> protoporphyrinogen_A[m] + 2 CO2_A[m]	Cpox	EC-1.3.3.3
RA_heme8_m	Heme Metabolism	Astrocyte	protoporphyrinogen_A[m] + 3 O2_A[m] -> protoporphyrin_A[m] + 3 H2O2_A[m]	Ppox	EC-1.3.3.4
RA_heme9_m	Heme Metabolism	Astrocyte	protoporphyrin_A[m] -> protoheme_A[m]	Fech	EC-4.99.1.1
RA_heme10_c	Heme Metabolism	Astrocyte	protoheme_A[c] + 3 O2_A[c] + 3 NADPH_A[c] -> biliverdin_A[c] + 3 NADP_A[c]	Hmox1 | Hmox2	EC-1.14.99.3
RA_heme11_c	Heme Metabolism	Astrocyte	biliverdin_A[c] + NADPH_A[c] -> bilirubin_A[c] + NADP_A[c]	Blvra | Blvrb	EC-1.3.1.24
RN_heme1_m	Heme Metabolism	Neuron	Glycine_N[m] + Succinyl-CoA_N[m] -> CO2_N[m] + 5-amino-levulinate_N[m] + CoenzymeA_N[m]	Alas2 | Alas1	EC-2.3.1.37
RN_heme2_c	Heme Metabolism	Neuron	Glycine_N[c] + Succinyl-CoA_N[c] -> CO2_N[c] + 5-amino-levulinate_N[c] + CoenzymeA_N[c]	Alas1	EC-2.3.1.37
RN_heme3_c	Heme Metabolism	Neuron	2 5-amino-levulinate_N[c] -> porphobilinogen_N[c]	Alad	EC-4.2.1.24
RN_heme4_c	Heme Metabolism	Neuron	4 porphobilinogen_N[c] -> 4 NH4_N[c] + hydroxymethylbilane_N[c]	Hmbs	EC-2.5.1.61
RN_heme5_c	Heme Metabolism	Neuron	hydroxymethylbilane_N[c] -> uroporphyrinogen_N[c]	Uros	EC-4.2.1.75
RN_heme6_c	Heme Metabolism	Neuron	uroporphyrinogen_N[c] -> 4 CO2_N[c] + coproporphyrinogen_N[c]	Urod	EC-4.1.1.37
RN_heme7_m	Heme Metabolism	Neuron	coproporphyrinogen_N[m] + O2_N[m] -> protoporphyrinogen_N[m] + 2 CO2_N[m]	Cpox	EC-1.3.3.3
RN_heme8_m	Heme Metabolism	Neuron	protoporphyrinogen_N[m] + 3 O2_N[m] -> protoporphyrin_N[m] + 3 H2O2_N[m]	Ppox	EC-1.3.3.4
RN_heme9_m	Heme Metabolism	Neuron	protoporphyrin_N[m] -> protoheme_N[m]	Fech	EC-4.99.1.1
RN_heme10_c	Heme Metabolism	Neuron	protoheme_N[c] + 3 O2_N[c] + 3 NADPH_N[c] -> biliverdin_N[c] + 3 NADP_N[c]	Hmox1 | Hmox2	EC-1.14.99.3
RN_heme11_c	Heme Metabolism	Neuron	biliverdin_N[c] + NADPH_N[c] -> bilirubin_N[c] + NADP_N[c]	Blvra | Blvrb	EC-1.3.1.24
RA_purn1_c	Purine Nucleoside Metabolism	Astrocyte	adenosine_A[c] + ATP_A[c] -> AMP_A[c] + ADP_A[c]	Adk	EC-2.7.1.20
RA_purn2_c	Purine Nucleoside Metabolism	Astrocyte	AMP_A[c] + ATP_A[c] -> 2 ADP_A[c]	Ak1 | Ak5 | Ak7 | Taf9 | Ak8	EC-2.7.4.3
RA_purn3_m	Purine Nucleoside Metabolism	Astrocyte	AMP_A[m] + ATP_A[m] -> 2 ADP_A[m]	Ak2 | Ak3	EC-2.7.4.3
RA_purn4_c	Purine Nucleoside Metabolism	Astrocyte	ATP_A[c] -> AMP_A[c] + 2 phosphate_A[c]	Entpd1 | Entpd8	EC-3.6.1.5
RA_purn5_c	Purine Nucleoside Metabolism	Astrocyte	ADP_A[c] -> AMP_A[c] + phosphate_A[c]	Entpd3 | Entpd4 | Entpd5 | Nudt9 | Nudt5 | Cant1	EC-3.6.1.6
RA_purn6_c	Purine Nucleoside Metabolism	Astrocyte	AMP_A[c] -> adenosine_A[c] + phosphate_A[c]	Nt5c3 | Nt5e | Nt5c1b | Nt5dc2 | Nt5c2 | Entpd3 | Nt5c | Nt5m | Nt5c1a | Nt5dc1 | Nt5dc3	EC-3.1.3.5
RA_purn7_c	Purine Nucleoside Metabolism	Astrocyte	ATP_A[c] -> ADP_A[c] + phosphate_A[c]	Fxyd2	EC-3.6.3.9
RA_purn8_c	Purine Nucleoside Metabolism	Astrocyte	guanosine_A[c] + phosphate_A[c] <-> ribose-1-phosphate_A[c] + guanine_A[c]	Pnp | Pnp2	EC-2.4.2.1
RA_purn9_c	Purine Nucleoside Metabolism	Astrocyte	5-phospho-D-ribose-1-diphosphate_A[c] + guanine_A[c] -> GMP_A[c] + diphosphate_A[c]	Hprt	EC-2.4.2.8
RA_purn10_c	Purine Nucleoside Metabolism	Astrocyte	Ribose-5-phosphate_A[c] + ATP_A[c] -> AMP_A[c] + 5-phospho-D-ribose-1-diphosphate_A[c]	Prpsap2 | Prpsap1 | Prps2	EC-2.7.6.1
RA_purn11_c	Purine Nucleoside Metabolism	Astrocyte	ribose-1-phosphate_A[c] -> Ribose-5-phosphate_A[c]	Pgm2	EC-5.4.2.7
RA_purn12_c	Purine Nucleoside Metabolism	Astrocyte	GMP_A[c] + ATP_A[c] -> GDP_A[c] + ADP_A[c]	Mpp5 | Guk1	EC-2.7.4.8
RA_purn13_c	Purine Nucleoside Metabolism	Astrocyte	GDP_A[c] + ATP_A[c] -> GTP_A[c] + ADP_A[c]	Rp2h | Nme5 | Nme2 | Nme1	EC-2.7.4.6
RA_purn14_m	Purine Nucleoside Metabolism	Astrocyte	GDP_A[m] + ATP_A[m] -> GTP_A[m] + ADP_A[m]	Nme4 | Nme3 | Nme1 | Nme6	EC-2.7.4.6
RA_purn15_c	Purine Nucleoside Metabolism	Astrocyte	GTP_A[c] -> GDP_A[c] + phosphate_A[c]	Dnm3 | Dnm1l | Dnm2 | Dnm1	EC-3.6.5.5
RA_purn16_m	Purine Nucleoside Metabolism	Astrocyte	GTP_A[m] -> GDP_A[m] + phosphate_A[m]	Dnm3 | Dnm1l | Dnm2 | Dnm1	EC-3.6.5.5
RA_purn17_c	Purine Nucleoside Metabolism	Astrocyte	GMP_A[c] -> guanosine_A[c] + phosphate_A[c]	Nt5c3 | Nt5e | Nt5c1b | Nt5dc2 | Nt5c2 | Entpd3 | Nt5c | Nt5m | Nt5c1a | Nt5dc1 | Nt5dc3	EC-3.1.3.5
RA_purn18_c	Purine Nucleoside Metabolism	Astrocyte	GTP_A[c] -> GMP_A[c] + diphosphate_A[c]	Entpd1 | Entpd8	EC-3.6.1.5
RA_purn19_c	Purine Nucleoside Metabolism	Astrocyte	GDP_A[c] -> GMP_A[c] + phosphate_A[c]	Entpd3 | Entpd4 | Entpd5 | Nudt9 | Nudt5 | Cant1	EC-3.6.1.6
RA_pyrn1_c	Pirimidine Nucleoside Metabolism	Astrocyte	UTP_A[c] -> UDP_A[c] + phosphate_A[c]	Ntpcr | Cdc6 | Katna1 | Abca7 | Entpd3 | Clpx | Mmaa | Ruvbl2 | Clpb | Katnal1 | Abcb4 | Abcb1b | Abcb1a | Ntp	EC-3.6.1.15
RA_pyrn2_m	Pirimidine Nucleoside Metabolism	Astrocyte	UDP_A[m] + ATP_A[m] -> UTP_A[m] + ADP_A[m]	Nme4 | Nme3 | Nme1 | Nme6	EC-2.7.4.6
RA_pyrn3_c	Pirimidine Nucleoside Metabolism	Astrocyte	UDP_A[c] + ATP_A[c] -> UTP_A[c] + ADP_A[c]	Rp2h | Nme5 | Nme2 | Nme1	EC-2.7.4.6
RA_pyrn4_c	Pirimidine Nucleoside Metabolism	Astrocyte	UDP_A[c] -> UMP_A[c] + phosphate_A[c]	Entpd3 | Nudt9 | Nudt5 | Entpd4 | Entpd5 | Cant1	EC-3.6.1.6
RA_pyrn5_c	Pirimidine Nucleoside Metabolism	Astrocyte	UMP_A[c] + ATP_A[c] -> UDP_A[c] + ADP_A[c]	Cmpk1	EC-2.7.4.14
RA_pyrn6_m	Pirimidine Nucleoside Metabolism	Astrocyte	UMP_A[m] + ATP_A[m] -> UDP_A[m] + ADP_A[m]	Cmpk2	EC-2.7.4.14
RA_pyrn7_c	Pirimidine Nucleoside Metabolism	Astrocyte	UTP_A[c] -> UMP_A[c] + diphosphate_A[c]	Entpd1 | Entpd8	EC-3.6.1.5
RA_pyrn8_c	Pirimidine Nucleoside Metabolism	Astrocyte	uridine_A[c] + ATP_A[c] -> UMP_A[c] + ADP_A[c]	Nmrk1 | Uck1 | Uck2	EC-2.7.1.48
RA_pyrn9_c	Pirimidine Nucleoside Metabolism	Astrocyte	uridine_A[c] + phosphate_A[c] -> ribose-1-phosphate_A[c] + uracil_A[c]	Upp1 | Upp2	EC-2.4.2.3
RA_pyrn10_m	Pirimidine Nucleoside Metabolism	Astrocyte	uridine_A[m] + phosphate_A[m] -> ribose-1-phosphate_A[m] + uracil_A[m]	Upp2	EC-2.4.2.3
RA_pyrn11_c	Pirimidine Nucleoside Metabolism	Astrocyte	UMP_A[c] -> uridine_A[c] + phosphate_A[c]	Nt5c3 | Nt5e | Nt5c1b | Nt5dc2 | Nt5c2 | Entpd3 | Nt5c | Nt5m | Nt5c1a | Nt5dc1 | Nt5dc3	EC-3.1.3.5
RA_pyrn12_c	Pirimidine Nucleoside Metabolism	Astrocyte	cytidine_A[c] -> NH4_A[c] + uridine_A[c]	Apobec1 | Aicda | Cda	EC-3.5.4.5
RA_pyrn13_m	Pirimidine Nucleoside Metabolism	Astrocyte	CMP_A[m] + ATP_A[m] -> CDP_A[m] + ADP_A[m]	Cmpk2	EC-2.7.4.14
RA_pyrn14_c	Pirimidine Nucleoside Metabolism	Astrocyte	CMP_A[c] + ATP_A[c] -> CDP_A[c] + ADP_A[c]	Cmpk2 | Cmpk1	EC-2.7.4.14
RA_pyrn15_c	Pirimidine Nucleoside Metabolism	Astrocyte	CDP_A[c] -> CMP_A[c] + phosphate_A[c]	Entpd3 | Nudt9 | Nudt5 | Entpd4 | Entpd5 | Cant1	EC-3.6.1.6
RA_pyrn16_m	Pirimidine Nucleoside Metabolism	Astrocyte	CDP_A[m] + ATP_A[m] -> CTP_A[m] + ADP_A[m]	Nme4 | Nme3 | Nme1 | Nme6	EC-2.7.4.6
RA_pyrn17_c	Pirimidine Nucleoside Metabolism	Astrocyte	CDP_A[c] + ATP_A[c] -> CTP_A[c] + ADP_A[c]	Rp2h | Nme5 | Nme2 | Nme1	EC-2.7.4.6
RA_pyrn18_c	Pirimidine Nucleoside Metabolism	Astrocyte	CTP_A[c] -> CMP_A[c] + diphosphate_A[c]	Entpd1 | Entpd8	EC-3.6.1.5
RA_pyrn19_c	Pirimidine Nucleoside Metabolism	Astrocyte	CTP_A[c] -> CDP_A[c] + phosphate_A[c]	Ntpcr | Cdc6 | Katna1 | Abca7 | Entpd3 | Clpx | Mmaa | Ruvbl2 | Clpb | Katnal1 | Abcb4 | Abcb1b | Abcb1a | Ntp	EC-3.6.1.15
RA_pyrn20_c	Pirimidine Nucleoside Metabolism	Astrocyte	CMP_A[c] -> cytidine_A[c] + phosphate_A[c]	Nt5c3 | Nt5e | Nt5c1b | Nt5dc2 | Nt5c2 | Entpd3 | Nt5c | Nt5m | Nt5c1a | Nt5dc1 | Nt5dc3	EC-3.1.3.5
RA_pyrn21_c	Pirimidine Nucleoside Metabolism	Astrocyte	cytidine_A[c] + ATP_A[c] -> ADP_A[c] + CMP_A[c]	Nmrk1 | Uck1 | Uck2	EC-2.7.1.48
RN_purn1_c	Purine Nucleoside Metabolism	Neuron	adenosine_N[c] + ATP_N[c] -> AMP_N[c] + ADP_N[c]	Adk	EC-2.7.1.20
RN_purn2_c	Purine Nucleoside Metabolism	Neuron	AMP_N[c] + ATP_N[c] -> 2 ADP_N[c]	Ak1 | Ak5 | Ak7 | Taf9 | Ak8	EC-2.7.4.3
RN_purn3_m	Purine Nucleoside Metabolism	Neuron	AMP_N[m] + ATP_N[m] -> 2 ADP_N[m]	Ak2 | Ak3	EC-2.7.4.3
RN_purn4_c	Purine Nucleoside Metabolism	Neuron	ATP_N[c] -> AMP_N[c] + 2 phosphate_N[c]	Entpd1 | Entpd8	EC-3.6.1.5
RN_purn5_c	Purine Nucleoside Metabolism	Neuron	ADP_N[c] -> AMP_N[c] + phosphate_N[c]	Entpd3 | Entpd4 | Entpd5 | Nudt9 | Nudt5 | Cant1	EC-3.6.1.6
RN_purn6_c	Purine Nucleoside Metabolism	Neuron	AMP_N[c] -> adenosine_N[c] + phosphate_N[c]	Nt5c3 | Nt5e | Nt5c1b | Nt5dc2 | Nt5c2 | Entpd3 | Nt5c | Nt5m | Nt5c1a | Nt5dc1 | Nt5dc3	EC-3.1.3.5
RN_purn7_c	Purine Nucleoside Metabolism	Neuron	ATP_N[c] -> ADP_N[c] + phosphate_N[c]	Fxyd2	EC-3.6.3.9
RN_purn8_c	Purine Nucleoside Metabolism	Neuron	guanosine_N[c] + phosphate_N[c] <-> ribose-1-phosphate_N[c] + guanine_N[c]	Pnp | Pnp2	EC-2.4.2.1
RN_purn9_c	Purine Nucleoside Metabolism	Neuron	5-phospho-D-ribose-1-diphosphate_N[c] + guanine_N[c] -> GMP_N[c] + diphosphate_N[c]	Hprt	EC-2.4.2.8
RN_purn10_c	Purine Nucleoside Metabolism	Neuron	Ribose-5-phosphate_N[c] + ATP_N[c] -> AMP_N[c] + 5-phospho-D-ribose-1-diphosphate_N[c]	Prpsap2 | Prpsap1 | Prps2	EC-2.7.6.1
RN_purn11_c	Purine Nucleoside Metabolism	Neuron	ribose-1-phosphate_N[c] -> Ribose-5-phosphate_N[c]	Pgm2	EC-5.4.2.7
RN_purn12_c	Purine Nucleoside Metabolism	Neuron	GMP_N[c] + ATP_N[c] -> GDP_N[c] + ADP_N[c]	Mpp5 | Guk1	EC-2.7.4.8
RN_purn13_c	Purine Nucleoside Metabolism	Neuron	GDP_N[c] + ATP_N[c] -> GTP_N[c] + ADP_N[c]	Rp2h | Nme5 | Nme2 | Nme1	EC-2.7.4.6
RN_purn14_m	Purine Nucleoside Metabolism	Neuron	GDP_N[m] + ATP_N[m] -> GTP_N[m] + ADP_N[m]	Nme4 | Nme3 | Nme1 | Nme6	EC-2.7.4.6
RN_purn15_c	Purine Nucleoside Metabolism	Neuron	GTP_N[c] -> GDP_N[c] + phosphate_N[c]	Dnm3 | Dnm1l | Dnm2 | Dnm1	EC-3.6.5.5
RN_purn16_m	Purine Nucleoside Metabolism	Neuron	GTP_N[m] -> GDP_N[m] + phosphate_N[m]	Dnm3 | Dnm1l | Dnm2 | Dnm1	EC-3.6.5.5
RN_purn17_c	Purine Nucleoside Metabolism	Neuron	GMP_N[c] -> guanosine_N[c] + phosphate_N[c]	Nt5c3 | Nt5e | Nt5c1b | Nt5dc2 | Nt5c2 | Entpd3 | Nt5c | Nt5m | Nt5c1a | Nt5dc1 | Nt5dc3	EC-3.1.3.5
RN_purn18_c	Purine Nucleoside Metabolism	Neuron	GTP_N[c] -> GMP_N[c] + diphosphate_N[c]	Entpd1 | Entpd8	EC-3.6.1.5
RN_purn19_c	Purine Nucleoside Metabolism	Neuron	GDP_N[c] -> GMP_N[c] + phosphate_N[c]	Entpd3 | Entpd4 | Entpd5 | Nudt9 | Nudt5 | Cant1	EC-3.6.1.6
RN_pyrn1_c	Pirimidine Nucleoside Metabolism	Neuron	UTP_N[c] -> UDP_N[c] + phosphate_N[c]	Ntpcr | Cdc6 | Katna1 | Abca7 | Entpd3 | Clpx | Mmaa | Ruvbl2 | Clpb | Katnal1 | Abcb4 | Abcb1b | Abcb1a | Ntp	EC-3.6.1.15
RN_pyrn2_m	Pirimidine Nucleoside Metabolism	Neuron	UDP_N[m] + ATP_N[m] -> UTP_N[m] + ADP_N[m]	Nme4 | Nme3 | Nme1 | Nme6	EC-2.7.4.6
RN_pyrn3_c	Pirimidine Nucleoside Metabolism	Neuron	UDP_N[c] + ATP_N[c] -> UTP_N[c] + ADP_N[c]	Rp2h | Nme5 | Nme2 | Nme1	EC-2.7.4.6
RN_pyrn4_c	Pirimidine Nucleoside Metabolism	Neuron	UDP_N[c] -> UMP_N[c] + phosphate_N[c]	Entpd3 | Nudt9 | Nudt5 | Entpd4 | Entpd5 | Cant1	EC-3.6.1.6
RN_pyrn5_c	Pirimidine Nucleoside Metabolism	Neuron	UMP_N[c] + ATP_N[c] -> UDP_N[c] + ADP_N[c]	Cmpk1 | Cmpk2	EC-2.7.4.22
RN_pyrn6_m	Pirimidine Nucleoside Metabolism	Neuron	UMP_N[m] + ATP_N[m] -> UDP_N[m] + ADP_N[m]	Cmpk2	EC-2.7.4.22
RN_pyrn7_c	Pirimidine Nucleoside Metabolism	Neuron	UTP_N[c] -> UMP_N[c] + diphosphate_N[c]		EC-3.6.1.5
RN_pyrn8_c	Pirimidine Nucleoside Metabolism	Neuron	uridine_N[c] + ATP_N[c] -> UMP_N[c] + ADP_N[c]	Nmrk1 | Uck1 | Uck2	EC-2.7.1.48
RN_pyrn9_c	Pirimidine Nucleoside Metabolism	Neuron	uridine_N[c] + phosphate_N[c] -> ribose-1-phosphate_N[c] + uracil_N[c]	Upp1 | Upp2	EC-2.4.2.3
RN_pyrn10_m	Pirimidine Nucleoside Metabolism	Neuron	uridine_N[m] + phosphate_N[m] -> ribose-1-phosphate_N[m] + uracil_N[m]	Upp2	EC-2.4.2.3
RN_pyrn11_c	Pirimidine Nucleoside Metabolism	Neuron	UMP_N[c] -> uridine_N[c] + phosphate_N[c]
RN_pyrn12_c	Pirimidine Nucleoside Metabolism	Neuron	cytidine_N[c] -> NH4_N[c] + uridine_N[c]	Apobec1 | Aicda | Cda	EC-3.5.4.5
RN_pyrn13_m	Pirimidine Nucleoside Metabolism	Neuron	CMP_N[m] + ATP_N[m] -> CDP_N[m] + ADP_N[m]	Cmpk2	EC-2.7.4.14
RN_pyrn14_c	Pirimidine Nucleoside Metabolism	Neuron	CMP_N[c] + ATP_N[c] -> CDP_N[c] + ADP_N[c]	Cmpk1	EC-2.7.4.14
RN_pyrn15_c	Pirimidine Nucleoside Metabolism	Neuron	CDP_N[c] -> CMP_N[c] + phosphate_N[c]	Entpd3 | Nudt9 | Nudt5 | Entpd4 | Entpd5 | Cant1	EC-3.6.1.6
RN_pyrn16_m	Pirimidine Nucleoside Metabolism	Neuron	CDP_N[m] + ATP_N[m] -> CTP_N[m] + ADP_N[m]	Nme4 | Nme3 | Nme1 | Nme6	EC-2.7.4.6
RN_pyrn17_c	Pirimidine Nucleoside Metabolism	Neuron	CDP_N[c] + ATP_N[c] -> CTP_N[c] + ADP_N[c]	Rp2h | Nme5 | Nme2 | Nme1	EC-2.7.4.6
RN_pyrn18_c	Pirimidine Nucleoside Metabolism	Neuron	CTP_N[c] -> CMP_N[c] + diphosphate_N[c]		EC-3.6.1.5
RN_pyrn19_c	Pirimidine Nucleoside Metabolism	Neuron	CTP_N[c] -> CDP_N[c] + phosphate_N[c]	Cdc6 | Katna1 | Abca7 | Entpd3 | Clpx | Mmaa | Ruvbl2 | Clpb | Katnal1 | Abcb4 | Abcb1b | Abcb1a | Ntp	EC-3.6.1.15
RN_pyrn20_c	Pirimidine Nucleoside Metabolism	Neuron	CMP_N[c] -> cytidine_N[c] + phosphate_N[c]
RN_pyrn21_c	Pirimidine Nucleoside Metabolism	Neuron	cytidine_N[c] + ATP_N[c] -> ADP_N[c] + CMP_N[c]	Nmrk1 | Uck1 | Uck2	EC-2.7.1.48
RA_glg1_c	Glycogen Degradation Metabolism	Astrocyte	Glycogen_A[c] + phosphate_A[c] -> Glucose-1-phosphate_A[c]	Pygm | Pygl | Pygb	EC-2.4.1.1
RA_glg2_c	Glycogen Degradation Metabolism	Astrocyte	Glucose-1-phosphate_A[c] <-> Glucose-6-phosphate_A[c]	Pgm1 | Pgm2 | Pgm2l1 | Pgm3 | Pgm5	EC-5.4.2.2
RA_ket1_m	Ketone Body Degradation	Astrocyte	Acetoacetate_A[m] + Succinyl-CoA_A[m] -> Acetoacetyl-CoA_A[m] + Succinate_A[m]	Oxct2a | Oxct2b | Oxct1	EC-2.8.3.5
RA_ket2_m	Ketone Body Degradation	Astrocyte	Acetoacetyl-CoA_A[m] + CoenzymeA_A[m] <-> 2 Acetyl-CoA_A[m]	Acat1 | Acat2	EC-2.3.1.9
RA_ket3_c	Ketone Body Degradation	Astrocyte	Acetoacetyl-CoA_A[c] + CoenzymeA_A[c] <-> 2 Acetyl-CoA_A[c]	Acat2	EC-2.3.1.9
RA_ket4_m	Ketone Body Degradation	Astrocyte	beta-hydroxybutyrate_A[m] + NAD_A[m] <-> Acetoacetate_A[m] + NADH_A[m]	Bdh1	EC-1.1.1.30
RA_ket5_c	Ketone Body Degradation	Astrocyte	beta-hydroxybutyrate_A[c] + NAD_A[c] <-> Acetoacetate_A[c] + NADH_A[c]	Bdh2	EC-1.1.1.30
RN_ket1_m	Ketone Body Degradation	Neuron	Acetoacetate_N[m] + Succinyl-CoA_N[m] -> Acetoacetyl-CoA_N[m] + Succinate_N[m]	Oxct1 | Oxct2a | Oxct2b	EC-2.8.3.5
RN_ket2_m	Ketone Body Degradation	Neuron	Acetoacetyl-CoA_N[m] + CoenzymeA_N[m] <-> 2 Acetyl-CoA_N[m]	Acat1 | Acat2	EC-2.3.1.9
RN_ket3_c	Ketone Body Degradation	Neuron	Acetoacetyl-CoA_N[c] + CoenzymeA_N[c] <-> 2 Acetyl-CoA_N[c]	Acat2	EC-2.3.1.9
RN_ket4_m	Ketone Body Degradation	Neuron	beta-hydroxybutyrate_N[m] + NAD_N[m] <-> Acetoacetate_N[m] + NADH_N[m]	Bdh1	EC-1.1.1.30
RN_ket5_c	Ketone Body Degradation	Neuron	beta-hydroxybutyrate_N[c] + NAD_N[c] <-> Acetoacetate_N[c] + NADH_N[c]	Bdh2	EC-1.1.1.30
RA_main1_c	Maintenance	Astrocyte	ATP_A[c] -> ADP_A[c] + phosphate_A[c]
RN_main1_c	Maintenance	Neuron	ATP_N[c] -> ADP_N[c] + phosphate_N[c]
RA_phos1_c	Phosphate Metabolism	Astrocyte	diphosphate_A[c] -> 2 phosphate_A[c]	Lhpp | Ppa1	EC-3.6.1.1
RA_phos2_m	Phosphate Metabolism	Astrocyte	diphosphate_A[m] -> 2 phosphate_A[m]	Ppa2 | Ppa1	EC-3.6.1.1
RN_phos1_c	Phosphate Metabolism	Neuron	diphosphate_N[c] -> 2 phosphate_N[c]	Lhpp | Ppa1	EC-3.6.1.1
RN_phos2_m	Phosphate Metabolism	Neuron	diphosphate_N[m] -> 2 phosphate_N[m]	Ppa2 | Ppa1	EC-3.6.1.1
RN_bcarb1_m	Bicarbonate Metabolism	Neuron	Bicarbonate_N[m] <-> CO2_N[m]	Car5b | Car15 | Car14 | Car13 | Car12 | Car4	EC-4.2.1.1
RN_bcarb2_c	Bicarbonate Metabolism	Neuron	Bicarbonate_N[c] <-> CO2_N[c]	Car15 | Car14 | Car13 | Car12 | Car4	EC-4.2.1.1
RA_macro1_c	Macromolecule Synthesis	Astrocyte	129.18 Cholesterol_A[c] + 60.6 Phosphatidyl-ethanolamine_A[c] + 58.35 Phosphatidyl-choline_A[c] + 23.44 Phosphatidyl-serine_A[c] + 10.72 sphingomyelin_A[c] + 5.99 phosphatidyl-inositol_A[c] + 2.84 cardiolipin_A[m] -> Lipid_A[c] + 0.571 phosphate_A[c]
RA_macro2_c	Macromolecule Synthesis	Astrocyte	328.25 Alanine_A[c] + 138.96 Arginine_A[c] + 33.50 Asparagine_A[c] + 321.27 Aspartate_A[c] + 45.93 Cysteine_A[c] + 1236.93 Glutamine_A[c] + 2323.97 Glutamate_A[c] + 875.06 Glycine_A[c] + 45.77 Histidine_A[c] + 43.28 Isoleucine_A[c] + 85.68 Leucine_A[c] + 58.01 Lysine_A[c] + 23.03 methionine_A[c] + 38.17 Phenylalanine_A[c] + 685.02 proline_A[c] + 283.11 Serine_A[c] + 121.08 threonine_A[c] + 35.28 …
RA_macro3_c	Macromolecule Synthesis	Astrocyte	516.58 AMP_A[c] + 861.05 CMP_A[c] + 976.05 GMP_A[c] + 516.58 UMP_A[c] -> RNA_A[c]
RA_macro4_c	Macromolecule Synthesis	Astrocyte	3844 Glucose-6-phosphate_A[c] -> Carbohydrates_A[c]
RA_macro5_c	Macromolecule Synthesis	Astrocyte	0.062 Carbohydrates_A[c] + 0.401 Lipid_A[c] + 0.499 Proteins_A[c] + 0.038 RNA_A[c] + 29.04 ATP_A[c] -> Macromolecule_A[c] + 29.04 ADP_A[c] + 29.04 phosphate_A[c]
RN_macro1_c	Macromolecule Synthesis	Neuron	129.18 Cholesterol_N[c] + 60.6 Phosphatidyl-ethanolamine_N[c] + 58.35 Phosphatidyl-choline_N[c] + 23.44 Phosphatidyl-serine_N[c] + 10.72 sphingomyelin_N[c] + 5.99 phosphatidyl-inositol_N[c] + 2.84 cardiolipin_N[m] -> Lipid_N[c] + 0.571 phosphate_N[c]
RN_macro2_c	Macromolecule Synthesis	Neuron	328.25 Alanine_N[c] + 138.96 Arginine_N[c] + 33.50 Asparagine_N[c] + 321.27 Aspartate_N[c] + 45.93 Cysteine_N[c] + 1236.93 Glutamine_N[c] + 2323.97 Glutamate_N[c] + 875.06 Glycine_N[c] + 45.77 Histidine_N[c] + 43.28 Isoleucine_N[c] + 85.68 Leucine_N[c] + 58.01 Lysine_N[c] + 23.03 methionine_N[c] + 38.17 Phenylalanine_N[c] + 685.02 proline_N[c] + 283.11 Serine_N[c] + 121.08 threonine_N[c] + 35.28 …
RN_macro3_c	Macromolecule Synthesis	Neuron	516.58 AMP_N[c] + 861.05 CMP_N[c] + 976.05 GMP_N[c] + 516.58 UMP_N[c] -> RNA_N[c]
RN_macro4_c	Macromolecule Synthesis	Neuron	3844 Glucose-6-phosphate_N[c] -> Carbohydrates_N[c]
RN_macro5_c	Macromolecule Synthesis	Neuron	0.062 Carbohydrates_N[c] + 0.401 Lipid_N[c] + 0.499 Proteins_N[c] + 0.038 RNA_N[c] + 29.04 ATP_N[c] -> Macromolecule_N[c] + 29.04 ADP_N[c] + 29.04 phosphate_N[c]
RA_t1_cm	Cytosol - Mitochondria Transport	Astrocyte	Pyruvate_A[c] <-> Pyruvate_A[m]	Mpc1 | Mpc2 | Slc16a1
RN_t1_cm	Cytosol - Mitochondria Transport	Neuron	Pyruvate_N[c] <-> Pyruvate_N[m]	Mpc1 | Mpc2 | Slc16a2
RN_t2_cm	Cytosol - Mitochondria Transport	Neuron	Fumarate_N[c] <-> Fumarate_N[m]	Slc25a10
RA_t2_cm	Cytosol - Mitochondria Transport	Astrocyte	Malate_A[c] <-> Malate_A[m]	Slc25a11
RN_t3_cm	Cytosol - Mitochondria Transport	Neuron	Malate_N[c] <-> Malate_N[m]	Slc25a11
RA_t3_cm	Cytosol - Mitochondria Transport	Astrocyte	Glutamine_A[m] <-> Glutamine_A[c]
RN_t4_cm	Cytosol - Mitochondria Transport	Neuron	Glutamine_N[m] <-> Glutamine_N[c]
RA_t4_cm	Cytosol - Mitochondria Transport	Astrocyte	Glutamate_A[c] <-> Glutamate_A[m]
RN_t5_cm	Cytosol - Mitochondria Transport	Neuron	Glutamate_N[c] <-> Glutamate_N[m]
RA_t5_cm	Cytosol - Mitochondria Transport	Astrocyte	GABA_A[c] <-> GABA_A[m]
RN_t6_cm	Cytosol - Mitochondria Transport	Neuron	GABA_N[c] <-> GABA_N[m]
RA_t6_cm	Cytosol - Mitochondria Transport	Astrocyte	Glycine_A[m] <-> Glycine_A[c]
RN_t7_cm	Cytosol - Mitochondria Transport	Neuron	Glycine_N[m] <-> Glycine_N[c]
RA_t7_cm	Cytosol - Mitochondria Transport	Astrocyte	tetrahydrofolate_A[m] <-> tetrahydrofolate_A[c]
RN_t8_cm	Cytosol - Mitochondria Transport	Neuron	tetrahydrofolate_N[m] <-> tetrahydrofolate_N[c]
RA_t8_cm	Cytosol - Mitochondria Transport	Astrocyte	Leucine_A[c] <-> Leucine_A[m]
RN_t9_cm	Cytosol - Mitochondria Transport	Neuron	Leucine_N[c] <-> Leucine_N[m]
RA_t9_cm	Cytosol - Mitochondria Transport	Astrocyte	Valine_A[c] <-> Valine_A[m]
RN_t10_cm	Cytosol - Mitochondria Transport	Neuron	Valine_N[c] <-> Valine_N[m]
RA_t10_cm	Cytosol - Mitochondria Transport	Astrocyte	Acetoacetate_A[m] <-> Acetoacetate_A[c]	Slc16a1
RN_t11_cm	Cytosol - Mitochondria Transport	Neuron	Acetoacetate_N[m] <-> Acetoacetate_N[c]	Slc16a1
RA_t11_cm	Cytosol - Mitochondria Transport	Astrocyte	alpha-ketoisocaproate_A[c] <-> alpha-ketoisocaproate_A[m]
RN_t12_cm	Cytosol - Mitochondria Transport	Neuron	alpha-ketoisocaproate_N[c] <-> alpha-ketoisocaproate_N[m]
RA_t12_cm	Cytosol - Mitochondria Transport	Astrocyte	alpha-keto-isovalerate_A[c] <-> alpha-keto-isovalerate_A[m]
RN_t13_cm	Cytosol - Mitochondria Transport	Neuron	alpha-keto-isovalerate_N[c] <-> alpha-keto-isovalerate_N[m]
RA_t13_cm	Cytosol - Mitochondria Transport	Astrocyte	alpha-keto-methylvalerate_A[c] <-> alpha-keto-methylvalerate_A[m]
RN_t14_cm	Cytosol - Mitochondria Transport	Neuron	alpha-keto-methylvalerate_N[c] <-> alpha-keto-methylvalerate_N[m]
RA_t14_cm	Cytosol - Mitochondria Transport	Astrocyte	Isoleucine_A[c] <-> Isoleucine_A[m]
RN_t15_cm	Cytosol - Mitochondria Transport	Neuron	Isoleucine_N[c] <-> Isoleucine_N[m]
RA_t15_cm	Cytosol - Mitochondria Transport	Astrocyte	S-1-pyrroline-5-carboxylate_A[m] <-> S-1-pyrroline-5-carboxylate_A[c]
RA_t16_cm	Cytosol - Mitochondria Transport	Astrocyte	Acetoacetyl-acp_A[c] <-> Acetoacetyl-acp_A[m]
RN_t16_cm	Cytosol - Mitochondria Transport	Neuron	Acetoacetyl-acp_N[c] <-> Acetoacetyl-acp_N[m]
RA_t17_cm	Cytosol - Mitochondria Transport	Astrocyte	Malonyl-CoA_A[c] <-> Malonyl-CoA_A[m]
RN_t17_cm	Cytosol - Mitochondria Transport	Neuron	Malonyl-CoA_N[c] <-> Malonyl-CoA_N[m]
RA_t18_cm	Cytosol - Mitochondria Transport	Astrocyte	Acetyl-acp_A[c] <-> Acetyl-acp_A[m]
RN_t18_cm	Cytosol - Mitochondria Transport	Neuron	Acetyl-acp_N[c] <-> Acetyl-acp_N[m]
RA_t19_cm	Cytosol - Mitochondria Transport	Astrocyte	Dihydroxyacetone-phosphate_A[m] <-> Dihydroxyacetone-phosphate_A[c]
RN_t19_cm	Cytosol - Mitochondria Transport	Neuron	Dihydroxyacetone-phosphate_N[m] <-> Dihydroxyacetone-phosphate_N[c]
RA_t20_cm	Cytosol - Mitochondria Transport	Astrocyte	Glycerol-3-phosphate_A[m] <-> Glycerol-3-phosphate_A[c]	Slc37a1
RN_t20_cm	Cytosol - Mitochondria Transport	Neuron	Glycerol-3-phosphate_N[m] <-> Glycerol-3-phosphate_N[c]	Slc37a1
RA_t21_cm	Cytosol - Mitochondria Transport	Astrocyte	ReducedGlutathione_A[m] <-> ReducedGlutathione_A[c]
RN_t21_cm	Cytosol - Mitochondria Transport	Neuron	ReducedGlutathione_N[m] <-> ReducedGlutathione_N[c]
RA_t22_cm	Cytosol - Mitochondria Transport	Astrocyte	beta-hydroxybutyrate_A[m] <-> beta-hydroxybutyrate_A[c]	Slc16a1
RN_t22_cm	Cytosol - Mitochondria Transport	Neuron	beta-hydroxybutyrate_N[m] <-> beta-hydroxybutyrate_N[c]	Slc16a1
RA_t23_cm	Cytosol - Mitochondria Transport	Astrocyte	Ornithine_A[c] <-> Ornithine_A[m]	Slc25a2 | Slc25a15
RN_t23_cm	Cytosol - Mitochondria Transport	Neuron	Ornithine_N[c] <-> Ornithine_N[m]	Slc25a2 | Slc25a15
RA_t24_cm	Cytosol - Mitochondria Transport	Astrocyte	Arginine_A[c] <-> Arginine_A[m]	Slc25a2 | Slc25a15
RN_t24_cm	Cytosol - Mitochondria Transport	Neuron	Arginine_N[c] <-> Arginine_N[m]	Slc25a2 | Slc25a15
RA_t25_cm	Cytosol - Mitochondria Transport	Astrocyte	Urea_A[c] <-> Urea_A[m]	Aqp9
RN_t25_cm	Cytosol - Mitochondria Transport	Neuron	Urea_N[c] <-> Urea_N[m]	Aqp9
RN_t26_cm	Cytosol - Mitochondria Transport	Neuron	Putrescine_N[c] <-> Putrescine_N[m]
RA_t26_cm	Cytosol - Mitochondria Transport	Astrocyte	Creatine_A[c] <-> Creatine_A[m]
RN_t27_cm	Cytosol - Mitochondria Transport	Neuron	Creatine_N[c] <-> Creatine_N[m]
RA_t27_cm	Cytosol - Mitochondria Transport	Astrocyte	5-amino-levulinate_A[c] <-> 5-amino-levulinate_A[m]
RN_t28_cm	Cytosol - Mitochondria Transport	Neuron	5-amino-levulinate_N[c] <-> 5-amino-levulinate_N[m]
RA_t28_cm	Cytosol - Mitochondria Transport	Astrocyte	coproporphyrinogen_A[m] <-> coproporphyrinogen_A[c]	Abcb6
RN_t29_cm	Cytosol - Mitochondria Transport	Neuron	coproporphyrinogen_N[m] <-> coproporphyrinogen_N[c]	Abcb6
RA_t29_cm	Cytosol - Mitochondria Transport	Astrocyte	CDP-diacylglycerol_A[m] <-> CDP-diacylglycerol_A[c]
RN_t30_cm	Cytosol - Mitochondria Transport	Neuron	CDP-diacylglycerol_N[m] <-> CDP-diacylglycerol_N[c]
RA_t30_cm	Cytosol - Mitochondria Transport	Astrocyte	H2O2_A[m] <-> H2O2_A[c]
RN_t31_cm	Cytosol - Mitochondria Transport	Neuron	H2O2_N[m] <-> H2O2_N[c]
RA_t31_cm	Cytosol - Mitochondria Transport	Astrocyte	NH4_A[m] <-> NH4_A[c]	Aqp9
RN_t32_cm	Cytosol - Mitochondria Transport	Neuron	NH4_N[m] <-> NH4_N[c]	Aqp9
RA_t32_cm	Cytosol - Mitochondria Transport	Astrocyte	O2_A[c] <-> O2_A[m]
RN_t33_cm	Cytosol - Mitochondria Transport	Neuron	O2_N[c] <-> O2_N[m]
RA_t33_cm	Cytosol - Mitochondria Transport	Astrocyte	CO2_A[c] <-> CO2_A[m]
RN_t34_cm	Cytosol - Mitochondria Transport	Neuron	CO2_N[c] <-> CO2_N[m]
RA_t34_cm	Cytosol - Mitochondria Transport	Astrocyte	Fumarate_A[c] <-> Fumarate_A[m]	Slc25a10
RA_t35_cm	Cytosol - Mitochondria Transport	Astrocyte	alpha-ketoglutarate_A[c] <-> alpha-ketoglutarate_A[m]
RN_t35_cm	Cytosol - Mitochondria Transport	Neuron	alpha-ketoglutarate_N[c] <-> alpha-ketoglutarate_N[m]
RA_t36_cm	Cytosol - Mitochondria Transport	Astrocyte	protoporphyrinogen_A[m] <-> protoporphyrinogen_A[c]
RN_t36_cm	Cytosol - Mitochondria Transport	Neuron	protoporphyrinogen_N[m] <-> protoporphyrinogen_N[c]
RA_t37_cm	Cytosol - Mitochondria Transport	Astrocyte	CreatinePhosphate_A[m] -> CreatinePhosphate_A[c]
RN_t37_cm	Cytosol - Mitochondria Transport	Neuron	CreatinePhosphate_N[m] -> CreatinePhosphate_N[c]
RA_t38_cm	Cytosol - Mitochondria Transport	Astrocyte	Lysine_A[c] -> Lysine_A[m]
RN_t38_cm	Cytosol - Mitochondria Transport	Neuron	Lysine_N[c] -> Lysine_N[m]	Slc25a2
RA_t39_cm	Cytosol - Mitochondria Transport	Astrocyte	2-oxobutanoate_A[c] <-> 2-oxobutanoate_A[m]	Slc16a7 | Slc16a1
RN_t39_cm	Cytosol - Mitochondria Transport	Neuron	2-oxobutanoate_N[c] <-> 2-oxobutanoate_N[m]	Slc16a7 | Slc16a1
RA_t40_cm	Cytosol - Mitochondria Transport	Astrocyte	threonine_A[c] <-> threonine_A[m]
RN_t40_cm	Cytosol - Mitochondria Transport	Neuron	threonine_N[c] <-> threonine_N[m]
RA_t41_cm	Cytosol - Mitochondria Transport	Astrocyte	s3_hydroxy_3_methylglutaryl-Coa_A[c] <-> s3_hydroxy_3_methylglutaryl-Coa_A[m]
RA_t42_cm	Cytosol - Mitochondria Transport	Astrocyte	proline_A[c] <-> proline_A[m]
RN_t41_cm	Cytosol - Mitochondria Transport	Neuron	proline_N[c] <-> proline_N[m]
RA_t43_cm	Cytosol - Mitochondria Transport	Astrocyte	AMP_A[c] <-> AMP_A[m]
RN_t42_cm	Cytosol - Mitochondria Transport	Neuron	AMP_N[c] <-> AMP_N[m]
RA_t44_cm	Cytosol - Mitochondria Transport	Astrocyte	CMP_A[c] <-> CMP_A[m]
RN_t43_cm	Cytosol - Mitochondria Transport	Neuron	CMP_N[c] <-> CMP_N[m]
RA_t45_cm	Cytosol - Mitochondria Transport	Astrocyte	CTP_A[c] <-> CTP_A[m]
RN_t44_cm	Cytosol - Mitochondria Transport	Neuron	CTP_N[c] <-> CTP_N[m]
RN_t45_cm	Cytosol - Mitochondria Transport	Neuron	Serine_N[c] -> Serine_N[m]
RA_t46_cm	Cytosol - Mitochondria Transport	Astrocyte	Succinyl-CoA_A[c] <-> Succinyl-CoA_A[m]
RN_t46_cm	Cytosol - Mitochondria Transport	Neuron	Succinyl-CoA_N[c] <-> Succinyl-CoA_N[m]
RA_t47_cm	Cytosol - Mitochondria Transport	Astrocyte	uridine_A[c] <-> uridine_A[m]
RN_t47_cm	Cytosol - Mitochondria Transport	Neuron	uridine_N[c] <-> uridine_N[m]
RN_t48_cm	Cytosol - Mitochondria Transport	Neuron	Alanine_N[c] -> Alanine_N[m]
RA_t48_cm	Cytosol - Mitochondria Transport	Astrocyte	S-adenosyl-L-methioninamine_A[c] <-> S-adenosyl-L-methioninamine_A[m]
RA_t49_cm	Cytosol - Mitochondria Transport	Astrocyte	Agmatine_A[c] <-> Agmatine_A[m]
RN_t49_cm	Cytosol - Mitochondria Transport	Neuron	Agmatine_N[c] <-> Agmatine_N[m]
RN_t50_cm	Cytosol - Mitochondria Transport	Neuron	Citrulline_N[c] <-> Citrulline_N[m]
RN_t51_cm	Cytosol - Mitochondria Transport	Neuron	Propionyl-CoA_N[c] <-> Propionyl-CoA_N[m]
RA_t50_cm	Cytosol - Mitochondria Transport	Astrocyte	glutaryl-CoA_A[c] <-> glutaryl-CoA_A[m]
RN_t52_cm	Cytosol - Mitochondria Transport	Neuron	glutaryl-CoA_N[c] <-> glutaryl-CoA_N[m]
RA_t51_cm	Cytosol - Mitochondria Transport	Astrocyte	protoporphyrinogen_A[c] <-> protoporphyrinogen_A[m]
RN_t53_cm	Cytosol - Mitochondria Transport	Neuron	protoporphyrinogen_N[c] <-> protoporphyrinogen_N[m]
RA_t52_cm	Cytosol - Mitochondria Transport	Astrocyte	Bicarbonate_A[m] <-> Bicarbonate_A[c]
RN_t54_cm	Cytosol - Mitochondria Transport	Neuron	Bicarbonate_N[m] <-> Bicarbonate_N[c]
RA_t53_cm	Cytosol - Mitochondria Transport	Astrocyte	phosphate_A[c] <-> phosphate_A[m]
RN_t55_cm	Cytosol - Mitochondria Transport	Neuron	phosphate_N[c] <-> phosphate_N[m]
RA_t54_cm	Cytosol - Mitochondria Transport	Astrocyte	diphosphate_A[c] <-> diphosphate_A[m]
RN_t56_cm	Cytosol - Mitochondria Transport	Neuron	diphosphate_N[c] <-> diphosphate_N[m]
RA_t55_cm	Cytosol - Mitochondria Transport	Astrocyte	CoenzymeA_A[m] <-> CoenzymeA_A[c]
RN_t57_cm	Cytosol - Mitochondria Transport	Neuron	CoenzymeA_N[m] <-> CoenzymeA_N[c]
RA_t56_cm	Cytosol - Mitochondria Transport	Astrocyte	protoheme_A[c] <-> protoheme_A[m]
RN_t58_cm	Cytosol - Mitochondria Transport	Neuron	protoheme_N[c] <-> protoheme_N[m]
RA_g3p1_c	Glycerol-3-phosphate Shuttle	Astrocyte	Dihydroxyacetone-phosphate_A[c] + NADH_A[c] -> Glycerol-3-phosphate_A[c] + NAD_A[c]	Gpd1l | Gpd1	EC-1.1.1.8
RA_g3p2_m	Glycerol-3-phosphate Shuttle	Astrocyte	Glycerol-3-phosphate_A[m] + FAD_A[m] -> Dihydroxyacetone-phosphate_A[m] + FADH2_A[m]	Gpd1 | Gpd2	EC-1.1.5.3
RN_g3p1_m	Glycerol-3-phosphate Shuttle	Neuron	Dihydroxyacetone-phosphate_N[m] + FADH2_N[m] -> Glycerol-3-phosphate_N[m] + FAD_N[m]	Gpd1 | Gpd2	EC-1.1.5.3
RA_shuttle1_cm	Fumarate/Malate Shuttle	Astrocyte	Fumarate_A[c] + Malate_A[m] <-> Fumarate_A[m] + Malate_A[c]	Slc25a10
RN_shuttle1_cm	Fumarate/Malate Shuttle	Neuron	Fumarate_N[c] + Malate_N[m] <-> Fumarate_N[m] + Malate_N[c]	Slc25a10
RA_shuttle2_cm	Malate/AKG Shuttle	Astrocyte	Malate_A[c] + alpha-ketoglutarate_A[m] <-> Malate_A[m] + alpha-ketoglutarate_A[c]	Slc25a11
RN_shuttle2_cm	Malate/AKG Shuttle	Neuron	Malate_N[c] + alpha-ketoglutarate_N[m] <-> Malate_N[m] + alpha-ketoglutarate_N[c]	Slc25a11
RA_shuttle3_cm	Malate/Citrate Shuttle	Astrocyte	Malate_A[c] + Citrate_A[m] <-> Malate_A[m] + Citrate_A[c]	Slc25a1
RN_shuttle3_cm	Malate/Citrate Shuttle	Neuron	Malate_N[c] + Citrate_N[m] <-> Malate_N[m] + Citrate_N[c]	Slc25a1
RA_shuttle4_cm	Malate/Isocitrate Shuttle	Astrocyte	Malate_A[c] + Isocitrate_A[m] <-> Malate_A[m] + Isocitrate_A[c]	Slc25a1
RN_shuttle4_cm	Malate/Isocitrate Shuttle	Neuron	Malate_N[c] + Isocitrate_N[m] <-> Malate_N[m] + Isocitrate_N[c]	Slc25a1
RA_shuttle5_cm	Aspartate/Glutamate Shuttle	Astrocyte	Aspartate_A[c] + Glutamate_A[m] <-> Aspartate_A[m] + Glutamate_A[c]	Slc25a12 | Slc25a13
RN_shuttle5_cm	Aspartate/Glutamate Shuttle	Neuron	Aspartate_N[c] + Glutamate_N[m] <-> Aspartate_N[m] + Glutamate_N[c]	Slc25a12 | Slc25a13
RA_shuttle6_cm	AKG/GSH Shuttle	Astrocyte	ReducedGlutathione_A[m] + alpha-ketoglutarate_A[c] <-> ReducedGlutathione_A[c] + alpha-ketoglutarate_A[m]	Slc25a11
RN_shuttle6_cm	AKG/GSH Shuttle	Neuron	ReducedGlutathione_N[m] + alpha-ketoglutarate_N[c] <-> ReducedGlutathione_N[c] + alpha-ketoglutarate_N[m]	Slc25a11
RA_shuttle7_cm	Ornithine/Citrulline Shuttle	Astrocyte	Citrulline_A[c] + Ornithine_A[m] <-> Citrulline_A[m] + Ornithine_A[c]	Slc25a2 | Slc25a15
RN_shuttle7_cm	Ornithine/Citrulline Shuttle	Neuron	Citrulline_N[c] + Ornithine_N[m] <-> Citrulline_N[m] + Ornithine_N[c]	Slc25a2 | Slc25a15
RA_shuttle8_cm	Ornithine/Arginine Shuttle	Astrocyte	Arginine_A[c] + Ornithine_A[m] <-> Arginine_A[m] + Ornithine_A[c]	Slc25a2 | Slc25a15
RN_shuttle8_cm	Ornithine/Arginine Shuttle	Neuron	Arginine_N[c] + Ornithine_N[m] <-> Arginine_N[m] + Ornithine_N[c]	Slc25a2 | Slc25a15
RA_shuttle9_cm	GTP/GDP Shuttle	Astrocyte	GDP_A[c] + GTP_A[m] <-> GDP_A[m] + GTP_A[c]	Slc25a26
RN_shuttle9_cm	GTP/GDP Shuttle	Neuron	GDP_N[c] + GTP_N[m] <-> GDP_N[m] + GTP_N[c]	Slc25a26
RA_shuttle10_cm	ADP/ATP Shuttle	Astrocyte	ADP_A[c] + ATP_A[m] -> ADP_A[m] + ATP_A[c]	Slc25a26 | Slc25a5 | Slc25a4
RN_shuttle10_cm	ADP/ATP Shuttle	Neuron	ADP_N[c] + ATP_N[m] -> ADP_N[m] + ATP_N[c]	Slc25a26 | Slc25a5 | Slc25a4
RA_shuttle11_cm	Citrate/PEP Shuttle	Astrocyte	Citrate_A[c] + Phosphoenol-pyruvate_A[m] <-> Citrate_A[m] + Phosphoenol-pyruvate_A[c]	Slc25a1
RN_shuttle11_cm	Citrate/PEP Shuttle	Neuron	Citrate_N[c] + Phosphoenol-pyruvate_N[m] <-> Citrate_N[m] + Phosphoenol-pyruvate_N[c]	Slc25a1
RA_shuttle12_cm	Citrate/AKG Shuttle	Astrocyte	Citrate_A[c] + alpha-ketoglutarate_A[m] <-> Citrate_A[m] + alpha-ketoglutarate_A[c]	Slc25a1
RN_shuttle12_cm	Citrate/AKG Shuttle	Neuron	Citrate_N[c] + alpha-ketoglutarate_N[m] <-> Citrate_N[m] + alpha-ketoglutarate_N[c]	Slc25a1
RA_shuttle13_cm	Citrate/Succinate Shuttle	Astrocyte	Citrate_A[c] + Succinate_A[m] <-> Citrate_A[m] + Succinate_A[c]	Slc25a1
RN_shuttle13_cm	Citrate/Succinate Shuttle	Neuron	Citrate_N[c] + Succinate_N[m] <-> Citrate_N[m] + Succinate_N[c]	Slc25a1
RA_shuttle14_cm	Citrate/Oxoloacetate Shuttle	Astrocyte	Citrate_A[c] + Oxoloacetate_A[m] <-> Citrate_A[m] + Oxoloacetate_A[c]	Slc25a1
RN_shuttle14_cm	Citrate/Oxoloacetate Shuttle	Neuron	Citrate_N[c] + Oxoloacetate_N[m] <-> Citrate_N[m] + Oxoloacetate_N[c]	Slc25a1
RA_shuttle15_cm	Citrate/Isocitrate Shuttle	Astrocyte	Citrate_A[c] + Isocitrate_A[m] <-> Citrate_A[m] + Isocitrate_A[c]	Slc25a1
RN_shuttle15_cm	Citrate/Isocitrate Shuttle	Neuron	Citrate_N[c] + Isocitrate_N[m] <-> Citrate_N[m] + Isocitrate_N[c]	Slc25a1
RA_shuttle16_cm	Succinate/P Shuttle	Astrocyte	Succinate_A[c] + phosphate_A[m] <-> Succinate_A[m] + phosphate_A[c]
RN_shuttle16_cm	Succinate/P Shuttle	Neuron	Succinate_N[c] + phosphate_N[m] <-> Succinate_N[m] + phosphate_N[c]
RA_shuttle17_cm	alpha/ketoadipate-AKG Shuttle	Astrocyte	alpha-ketoadipate_A[c] + alpha-ketoglutarate_A[m] <-> alpha-ketoadipate_A[m] + alpha-ketoglutarate_A[c]	Slc25a21
RN_shuttle17_cm	alpha/ketoadipate-AKG Shuttle	Neuron	alpha-ketoadipate_N[c] + alpha-ketoglutarate_N[m] <-> alpha-ketoadipate_N[m] + alpha-ketoglutarate_N[c]	Slc25a21
Ex_Glc	Exchange	Astrocyte/Neuron	EXT -> Glucose
Ex_A_Glc	Exchange	Astrocyte	Glucose -> Glucose_A[c]
Ex_N_Glc	Exchange	Neuron	Glucose -> Glucose_N[c]
Ex_A_Lac	Exchange	Astrocyte	Lactate_A[c] -> EXT
Ex_N_Lac	Exchange	Neuron	Lactate_N[c] -> EXT
Ex_O2	Exchange	Astrocyte/Neuron	EXT -> O2
Ex_A_O2	Exchange	Astrocyte	O2 -> O2_A[c]
Ex_N_O2	Exchange	Neuron	O2 -> O2_N[c]
Ex_A_CO2	Exchange	Astrocyte	CO2_A[c] -> EXT
Ex_N_CO2	Exchange	Neuron	CO2_N[c] -> EXT
Ex_A_NH3	Exchange	Astrocyte	EXT <-> NH4_A[c]
Ex_Bic	Exchange	Astrocyte/Neuron	EXT <-> Bicarbonate
Ex_A_Bic	Exchange	Astrocyte	Bicarbonate <-> Bicarbonate_A[c]
Ex_N_Bic	Exchange	Neuron	Bicarbonate <-> Bicarbonate_N[c]
Ex_Pi	Exchange	Astrocyte/Neuron	EXT <-> phosphate
Ex_A_Pi	Exchange	Astrocyte	phosphate <-> phosphate_A[c]
Ex_N_Pi	Exchange	Neuron	phosphate <-> phosphate_N[c]
Ex_A_Ggen	Exchange	Astrocyte	EXT -> Glycogen_A[c]
Ex_A_Lina	Exchange	Astrocyte	EXT -> Linoleate_A[c]
Ex_A_Linn	Exchange	Astrocyte	EXT -> Linolenate_A[c]
Ex_Chol	Exchange	Astrocyte/Neuron	EXT -> Choline
Ex_A_Chol	Exchange	Astrocyte	Choline -> Choline_A[c]
Ex_N_Chol	Exchange	Neuron	Choline -> Choline_N[c]
EX_Ino	Exchange	Astrocyte/Neuron	EXT -> myo-inositol
EX_A_Ino	Exchange	Astrocyte	myo-inositol -> myo-inositol_A[c]
EX_N_Ino	Exchange	Neuron	myo-inositol -> myo-inositol_N[c]
Ex_N_Hchol	Exchange	Neuron	24-hydroxycholesterol_N[c] -> EXT
Ex_A_Leu	Exchange	Astrocyte	EXT -> Leucine_A[c]	Slc7a5 & Slc3a2 | Slc7a8 & Slc3a2 | Slc6a15 | Slc7a5 | Slc43a1 | Slc43a2 | Slc7a7 | Slc7a6
Ex_A_Ile	Exchange	Astrocyte	EXT -> Isoleucine_A[c]	Slc7a5 & Slc3a2 | Slc7a8 & Slc3a2 | Slc6a15 | Slc7a5 | Slc43a1 | Slc43a2
Ex_A_Cys	Exchange	Astrocyte	EXT -> Cystine_A[c]
Ex_A_Val	Exchange	Astrocyte	EXT -> Valine_A[c]	Slc7a5 & Slc3a2 | Slc7a8 & Slc3a2 | Slc6a15 | Slc43a1 | Slc43a2
Ex_A_Arg	Exchange	Astrocyte	EXT -> Arginine_A[c]
Ex_Tyr	Exchange	Astrocyte/Neuron	EXT <-> Tyrosine
Ex_A_Tyr	Exchange	Astrocyte	Tyrosine <-> Tyrosine_A[c]	Slc7a5 & Slc3a2 | Slc7a8
Ex_N_Tyr	Exchange	Neuron	Tyrosine <-> Tyrosine_N[c]	Slc7a5 & Slc3a2 | Slc7a8
Ex_Tryp	Exchange	Astrocyte/Neuron	EXT -> Tryptophan
Ex_A_Tryp	Exchange	Astrocyte	Tryptophan <-> Tryptophan_A[c]	Slc7a5 & Slc3a2 | Slc7a8 & Slc7a5
Ex_N_Tryp	Exchange	Neuron	Tryptophan <-> Tryptophan_N[c]	Slc7a5 & Slc3a2 | Slc7a8 & Slc7a5
Ex_Lys	Exchange	Astrocyte/Neuron	EXT -> Lysine
Ex_A_Lys	Exchange	Astrocyte	Lysine <-> Lysine_A[c]	Slc7a7 | Slc7a1 | Slc7a2 | Slc7a3 | Slc7a9
Ex_N_Lys	Exchange	Neuron	Lysine <-> Lysine_N[c]	Slc7a7 | Slc7a1 | Slc7a2 | Slc7a3 | Slc7a9
Ex_Phe	Exchange	Astrocyte/Neuron	EXT -> Phenylalanine
Ex_A_Phe	Exchange	Astrocyte	Phenylalanine <-> Phenylalanine_A[c]	Slc7a5 & Slc3a2 | Slc7a8
Ex_N_Phe	Exchange	Neuron	Phenylalanine <-> Phenylalanine_N[c]	Slc7a5 & Slc3a2 | Slc7a8
Ex_His	Exchange	Astrocyte/Neuron	EXT -> Histidine
Ex_A_His	Exchange	Astrocyte	Histidine <-> Histidine_A[c]	Slc38a1 | Slc38a2 | Slc38a3 | Slc38a5 | Slc38a7 | Slc38a8 | Slc7a5 | Slc7a6 | Slc7a7 | Slc7a1 | Slc15a3
Ex_N_His	Exchange	Neuron	Histidine <-> Histidine_N[c]	Slc38a1 | Slc38a2 | Slc38a3 | Slc38a5 | Slc38a7 | Slc38a8 | Slc7a5 | Slc7a6 | Slc7a7 | Slc7a1 | Slc15a3
Ex_Orn	Exchange	Astrocyte/Neuron	EXT <-> Ornithine
Ex_A_Orn	Exchange	Astrocyte	Ornithine <-> Ornithine_A[c]	Slc7a7 | Slc7a1 | Slc7a3 | Slc7a4
Ex_N_Orn	Exchange	Neuron	Ornithine <-> Ornithine_N[c]	Slc7a7 | Slc7a1 | Slc7a3 | Slc7a4
Ex_Tau	Exchange	Astrocyte/Neurone	EXT <-> Taurine
Ex_A_Tau	Exchange	Astrocyte	Taurine <-> Taurine_A[c]
Ex_N_Tau	Exchange	Neuron	Taurine <-> Taurine_N[c]
Ex_Met	Exchange	Astrocyte/Neuron	EXT -> methionine
Ex_A_Met	Exchange	Astrocyte	methionine <-> methionine_A[c]	Slc7a5 & Slc3a2 | Slc7a8 & Slc3a2 | Slc6a15 |Slc43a1 | Slc7a7 | Slc7a6 | Slc43a2 | Slc38a1
Ex_N_Met	Exchange	Neuron	methionine <-> methionine_N[c]	Slc7a5 & Slc3a2 | Slc7a8 & Slc3a2 | Slc6a15 |Slc43a1 | Slc7a7 | Slc7a6 | Slc43a2 | Slc38a1
Ex_Thr	Exchange	Astrocyte/Neuron	EXT -> threonine
Ex_A_Thr	Exchange	Astrocyte	threonine <-> threonine_A[c]	Slc1a4 | Slc1a5 | Slc7a8 | Slc7a10
Ex_N_Thr	Exchange	Neuron	threonine <-> threonine_N[c]	Slc1a4 | Slc1a5 | Slc7a8 | Slc7a10
Ex_A_Asn	Exchange	Astrocyte	Asparagine_A[c] -> EXT	Slc38a3 | Slc38a5
Ex_N_Asn	Exchange	Neuron	Asparagine_N[c] -> EXT	Slc38a3 | Slc38a5
Ex_A_Gln	Exchange	Astrocyte	Glutamine_A[c] -> EXT	Slc1a5 | Slc7a5 | Slc7a8 | Slc7a9 & Slc3a1 | Slc38a3 | Slc38a5
Ex_N_Glut	Exchange	Neuron	Glutamate_N[c] -> EXT	Slc1a7 | Slc1a4 | Slc1a2 | Slc16a1 | Slc16a2 | Slc16a7 | Slc35a1 | Slc16a9 | Slc16a13 | Slc16a14 | Slc16a10 | Slc16a8 | Slc16a3 | Slc16a6 | Slc16a12 | Slc16a4 | Slc16a5 | Slc16a11 | Slc1a5 | Slc7a3 | Slc7a5 | Slc7a11 | Slc7a8 | Slc7a9 | Slc7a10 | Slc5a4b | Slc7a13 | Slc7a6 | Slc7a4 | Slc7a12 | Slc7a14 | Slc7a15 | Slc7a1 | Slc7a2
Ex_BHB	Exchange	Astrocyte/Neuron	EXT -> beta-hydroxybutyrate
Ex_A_BHB	Exchange	Astrocyte	beta-hydroxybutyrate -> beta-hydroxybutyrate_A[c]
Ex_N_BHB	Exchange	Neuron	beta-hydroxybutyrate -> beta-hydroxybutyrate_N[c]
Ex_Aca	Exchange	Astrocyte/Neuron	EXT -> Acetoacetate
Ex_A_Aca	Exchange	Astrocyte	Acetoacetate -> Acetoacetate_A[c]
Ex_N_Aca	Exchange	Neuron	Acetoacetate -> Acetoacetate_N[c]
Ex_THF_A	Exchange	Astrocyte	EXT -> tetrahydrofolate_A[c]
Ex_THF_N	Exchange	Neuron	EXT -> tetrahydrofolate_N[c]
Ex_Ade	Exchange	Astrocyte/Neuron	EXT <-> adenosine
Ex_A_Ade	Exchange	Astrocyte	adenosine <-> adenosine_A[c]
Ex_N_Ade	Exchange	Neuron	adenosine <-> adenosine_N[c]
Ex_Gua	Exchange	Astrocyte/Neuron	EXT -> guanosine
Ex_A_Gua	Exchange	Astrocyte	guanosine -> guanosine_A[c]
Ex_N_Gua	Exchange	Neuron	guanosine -> guanosine_N[c]
Ex_Uri	Exchange	Astrocyte/Neuron	EXT -> uridine
Ex_A_Uri	Exchange	Astrocyte	uridine -> uridine_A[c]
Ex_N_Uri	Exchange	Neuron	uridine -> uridine_N[c]
Ex_Cyt	Exchange	Astrocyte/Neuron	EXT -> cytidine
Ex_A_Cyt	Exchange	Astrocyte	cytidine -> cytidine_A[c]
Ex_N_Cyt	Exchange	Neuron	cytidine -> cytidine_N[c]
Ex_N_Dopa	Exchange	Neuron	Dopamine_N[c] -> EXT	Slc6a3
Ex_A_Norepi	Exchange	Astrocyte	Norepinephrine_A[c] -> EXT	Slc6a2
Ex_N_Norepi	Exchange	Neuron	Norepinephrine_N[c] -> EXT	Slc6a2
Ex_N_Epi	Exchange	Neuron	Epinephrine_N[c] -> EXT
Ex_A_Ser	Exchange	Astrocyte	Seratonin_A[c] -> EXT	Slc6a4
Ex_N_Ser	Exchange	Neuron	Seratonin_N[c] -> EXT	Slc6a4
Ex_A_Mel	Exchange	Astrocyte	Melatonin_A[c] -> EXT
Ex_N_Mel	Exchange	Neuron	Melatonin_N[c] -> EXT
Ex_N_Achol	Exchange	Neuron	Acetylcholine_N[c] -> EXT
Ex_N_Gsh	Exchange	Neuron	ReducedGlutathione_N[c] -> EXT
Ex_A_CPh	Exchange	Astrocyte	CreatinePhosphate_A[c] -> EXT
Ex_N_CPh	Exchange	Neuron	CreatinePhosphate_N[c] -> EXT
Ex_N_3ap	Exchange	Neuron	3-acetamidopropanal_N[c] -> EXT
Ex_N_2ob	Exchange	Neuron	2-oxobutanoate_N[c] -> EXT
Ex_A_Blr	Exchange	Astrocyte	bilirubin_A[c] -> EXT
Ex_N_Blr	Exchange	Neuron	bilirubin_N[c] -> EXT
Ex_A_Ure	Exchange	Astrocyte	Urea_A[c] -> EXT
Ex_N_Ure	Exchange	Neuron	Urea_N[c] -> EXT
Ex_N_MTA	Exchange	Neuron	S-methyl-5-thioadenosine_N[c] -> EXT
EX_A_Mhist	Exchange	Astrocyte	methylhistamine_A[c] -> EXT
EX_N_Mhist	Exchange	Neuron	methylhistamine_N[c] -> EXT
Ex_A_HVA	Exchange	Astrocyte	Homovanillate_A[c] -> EXT
Ex_N_Nmel	Exchange	Neuron	Neuromelanin_N[c] -> EXT
Ex_N_DHPA	Exchange	Neuron	3,4-Dihydroxyphenylacetate_N[c] -> EXT		EC-1.2.2.1
Ex_A_For	Exchange	Astrocyte	formate_A[c] -> EXT		EC-1.2.2.1
Ex_N_For	Exchange	Neuron	formate_N[c] -> EXT
Ex_A_Macro	Exchange	Astrocyte	Macromolecule_A[c] -> EXT
Ex_N_Macro	Exchange	Neuron	Macromolecule_N[c] -> EXT
